# Supplementary material for: Voltammetric sensor for electrochemical determination of the floral origin of honey based on a zinc oxide nanoparticle modified carbon paste electrode
Source: Copernicus journal article supplement (doi:10.5194/jsss-7-319-2018), 2018-04-26
Supplement: Supplementary file 1 [file jsss-7-319-2018-supplement.zip]

Archive with 2 entries (2 files):
- E-tongue responses for ZnONPs electrode.xls
- jsss-7-319-2018-supplement-title-page.pdf
