# Supplementary material for: Voltammetric sensor for electrochemical determination of the floral origin of honey based on a zinc oxide nanoparticle modified carbon paste electrode
Source: Copernicus journal article supplement (doi:10.5194/jsss-7-319-2018), 2018-04-26
Supplement: Supplementary file 1 [file jsss-7-319-2018-supplement.zip › E-tongue responses for ZnONPs electrode.xls]

## Sheet: RAW DATA (50 x 383)
						Electronic tongue responses obtained from ZnO NPs CPs electrode for different floral origin of honey
Applied Vtg		EUCALYPTUS ORIGIN											LEECHI ORIGIN											PUMPKIN ORIGIN												MUSTARD ORIGIN											TIL ORIGIN
-0.4493		e1	E2	E3	E4	E5	E6	E7	E8	E9	E10		L1	L2	L3	L4	L5	L6	L7	L8	L9	L10		P1	P2	P3	P4	P5	P6	P7	P8	P9	P10			M1	M2	M3	M4	M5	M6	M7	M8	M9	M10		T1	T2	T3
-0.4466		-4.004e-06	-3.75e-06	-3.716e-06	-3.625e-06	-3.643e-06	-3.626e-06	-3.644e-06	-3.638e-06	-3.75e-06	-3.625e-06		-9.373e-06	-9.067e-06	-8.537e-06	-8.545e-06	-8.483e-06	-8.315e-06	-8.155e-06	-8.156e-06	-8.311e-06	-8.243e-06		-5.448e-06	-5.394e-06	-5.425e-06	-5.348e-06	-5.21e-06	-7.469e-06	-6.371e-06	-6.297e-06	-6.208e-06	-6.141e-06			-7.591e-06	-7.36e-06	-7.299e-06	-7.233e-06	-7.209e-06	-7.008e-06	-7.055e-06	-7.021e-06	-7.034e-06	-6.913e-06		-1.6853e-05	-1.5467e-05	-1.5549e-05
-0.4378		-3.365e-06	-3.147e-06	-3.113e-06	-3.023e-06	-3.008e-06	-3.013e-06	-2.985e-06	-3.028e-06	-3.147e-06	-3.023e-06		-7.968e-06	-7.677e-06	-7.247e-06	-7.173e-06	-7.132e-06	-6.972e-06	-6.873e-06	-6.82e-06	-6.955e-06	-6.929e-06		-4.227e-06	-4.171e-06	-4.131e-06	-4.154e-06	-4.028e-06	-5.928e-06	-5.024e-06	-4.993e-06	-4.871e-06	-4.856e-06			-6.001e-06	-5.794e-06	-5.785e-06	-5.638e-06	-5.655e-06	-5.483e-06	-5.485e-06	-5.484e-06	-5.489e-06	-5.353e-06		-1.5009e-05	-1.3638e-05	-1.3706e-05
-0.432		-2.854e-06	-2.813e-06	-2.659e-06	-2.803e-06	-2.727e-06	-2.754e-06	-2.577e-06	-2.627e-06	-2.813e-06	-2.803e-06		-6.905e-06	-6.566e-06	-6.217e-06	-6.133e-06	-6.076e-06	-5.981e-06	-5.865e-06	-5.801e-06	-5.882e-06	-5.896e-06		-3.41e-06	-3.355e-06	-3.403e-06	-3.365e-06	-3.358e-06	-5.054e-06	-4.266e-06	-4.127e-06	-4.013e-06	-4.015e-06			-4.977e-06	-4.816e-06	-4.733e-06	-4.643e-06	-4.607e-06	-4.533e-06	-4.502e-06	-4.453e-06	-4.471e-06	-4.379e-06		-1.3519e-05	-1.2265e-05	-1.2265e-05
-0.428		-2.609e-06	-2.48e-06	-2.436e-06	-2.384e-06	-2.392e-06	-2.349e-06	-2.398e-06	-2.396e-06	-2.48e-06	-2.384e-06		-5.981e-06	-5.729e-06	-5.341e-06	-5.34e-06	-5.264e-06	-5.123e-06	-5.011e-06	-5.001e-06	-5.079e-06	-5.021e-06		-2.86e-06	-2.824e-06	-2.858e-06	-2.765e-06	-2.749e-06	-4.352e-06	-3.617e-06	-3.53e-06	-3.468e-06	-3.363e-06			-4.173e-06	-4.009e-06	-3.956e-06	-3.893e-06	-3.882e-06	-3.734e-06	-3.787e-06	-3.744e-06	-3.737e-06	-3.67e-06		-1.2197e-05	-1.1082e-05	-1.1106e-05
-0.419		-2.374e-06	-2.178e-06	-2.169e-06	-2.1577e-06	-2.1395e-06	-2.134e-06	-2.1018e-06	-2.1113e-06	-2.178e-06	-2.1577e-06		-5.192e-06	-4.97e-06	-4.645e-06	-4.563e-06	-4.514e-06	-4.387e-06	-4.316e-06	-4.255e-06	-4.364e-06	-4.335e-06		-2.427e-06	-2.4e-06	-2.365e-06	-2.389e-06	-2.345e-06	-3.725e-06	-3.089e-06	-3.061e-06	-2.954e-06	-2.948e-06			-3.54e-06	-3.386e-06	-3.358e-06	-3.262e-06	-3.281e-06	-3.143e-06	-3.164e-06	-3.146e-06	-3.156e-06	-3.064e-06		-1.111e-05	-9.986e-06	-1.0001e-05
-0.4138		-2.111e-06	-1.9973e-06	-1.9355e-06	-1.9495e-06	-1.9277e-06	-1.9257e-06	-1.8729e-06	-1.879e-06	-1.9973e-06	-1.9495e-06		-4.524e-06	-4.244e-06	-3.992e-06	-3.901e-06	-3.849e-06	-3.78e-06	-3.686e-06	-3.604e-06	-3.678e-06	-3.697e-06		-2.0041e-06	-1.9675e-06	-1.9631e-06	-1.9567e-06	-1.9709e-06	-3.254e-06	-2.695e-06	-2.589e-06	-2.462e-06	-2.484e-06			-2.982e-06	-2.857e-06	-2.789e-06	-2.705e-06	-2.681e-06	-2.639e-06	-2.603e-06	-2.562e-06	-2.563e-06	-2.503e-06		-1.0123e-05	-9.073e-06	-9.039e-06
-0.4052		-1.9101e-06	-1.8037e-06	-1.7562e-06	-1.7436e-06	-1.7235e-06	-1.7142e-06	-1.6941e-06	-1.6873e-06	-1.8037e-06	-1.7436e-06		-3.894e-06	-3.679e-06	-3.387e-06	-3.391e-06	-3.315e-06	-3.199e-06	-3.104e-06	-3.116e-06	-3.145e-06	-3.112e-06		-1.6909e-06	-1.6501e-06	-1.6502e-06	-1.6383e-06	-1.6677e-06	-2.878e-06	-2.313e-06	-2.239e-06	-2.184e-06	-2.093e-06			-2.472e-06	-2.347e-06	-2.297e-06	-2.262e-06	-2.249e-06	-2.125e-06	-2.176e-06	-2.131e-06	-2.142e-06	-2.086e-06		-9.184e-06	-8.246e-06	-8.225e-06
-0.4017		-1.7337e-06	-1.6222e-06	-1.5791e-06	-1.5627e-06	-1.544e-06	-1.5355e-06	-1.5085e-06	-1.5127e-06	-1.6222e-06	-1.5627e-06		-3.325e-06	-3.162e-06	-2.897e-06	-2.822e-06	-2.763e-06	-2.679e-06	-2.624e-06	-2.569e-06	-2.665e-06	-2.643e-06		-1.4127e-06	-1.3742e-06	-1.3719e-06	-1.3727e-06	-1.4133e-06	-2.464e-06	-1.9813e-06	-1.9123e-06	-1.8439e-06	-1.8159e-06			-2.081e-06	-1.9105e-06	-1.8795e-06	-1.8089e-06	-1.818e-06	-1.7257e-06	-1.7269e-06	-1.7072e-06	-1.7195e-06	-1.6527e-06		-8.398e-06	-7.425e-06	-7.417e-06
-0.3953		-1.5577e-06	-1.4585e-06	-1.4137e-06	-1.4137e-06	-1.3945e-06	-1.3981e-06	-1.3513e-06	-1.3529e-06	-1.4585e-06	-1.4137e-06		-2.855e-06	-2.631e-06	-2.424e-06	-2.337e-06	-2.297e-06	-2.256e-06	-2.176e-06	-2.091e-06	-2.168e-06	-2.198e-06		-1.1678e-06	-1.1333e-06	-1.1305e-06	-1.13e-06	-1.1873e-06	-2.165e-06	-1.7078e-06	-1.6377e-06	-1.5738e-06	-1.5494e-06			-1.6671e-06	-1.5522e-06	-1.5141e-06	-1.4473e-06	-1.4541e-06	-1.3747e-06	-1.3724e-06	-1.3465e-06	-1.3584e-06	-1.3011e-06		-7.677e-06	-6.749e-06	-6.69e-06
-0.388		-1.4123e-06	-1.3292e-06	-1.2718e-06	-1.2701e-06	-1.2585e-06	-1.2402e-06	-1.2281e-06	-1.2116e-06	-1.3292e-06	-1.2701e-06		-2.385e-06	-2.201e-06	-1.9866e-06	-1.9366e-06	-1.8979e-06	-1.8275e-06	-1.7489e-06	-1.7261e-06	-1.7922e-06	-1.7885e-06		-9.606e-07	-9.283e-07	-9.309e-07	-9.247e-07	-9.906e-07	-1.8999e-06	-1.464e-06	-1.3915e-06	-1.3473e-06	-1.3113e-06			-1.3305e-06	-1.2147e-06	-1.1821e-06	-1.1229e-06	-1.1366e-06	-1.0469e-06	-1.0507e-06	-1.0314e-06	-1.0486e-06	-9.92e-07		-6.917e-06	-6.114e-06	-6.052e-06
-0.3839		-1.291e-06	-1.1942e-06	-1.156e-06	-1.1391e-06	-1.1209e-06	-1.1126e-06	-1.0902e-06	-1.0904e-06	-1.1942e-06	-1.1391e-06		-1.9585e-06	-1.8078e-06	-1.5934e-06	-1.5428e-06	-1.5089e-06	-1.4471e-06	-1.3791e-06	-1.3495e-06	-1.4239e-06	-1.427e-06		-7.803e-07	-7.502e-07	-7.494e-07	-7.51e-07	-8.233e-07	-1.6542e-06	-1.2441e-06	-1.1869e-06	-1.1393e-06	-1.1108e-06			-1.0409e-06	-9.176e-07	-8.907e-07	-8.256e-07	-8.53e-07	-7.646e-07	-7.614e-07	-7.485e-07	-7.666e-07	-7.135e-07		-6.306e-06	-5.443e-06	-5.406e-06
-0.377		-1.1607e-06	-1.0704e-06	-1.0311e-06	-1.0287e-06	-1.0088e-06	-1.0075e-06	-9.709e-07	-9.741e-07	-1.0704e-06	-1.0287e-06		-1.5798e-06	-1.4347e-06	-1.2332e-06	-1.184e-06	-1.1589e-06	-1.1054e-06	-1.0394e-06	-1.0124e-06	-1.0831e-06	-1.0975e-06		-6.217e-07	-5.925e-07	-5.943e-07	-5.988e-07	-6.748e-07	-1.4378e-06	-1.0581e-06	-9.961e-07	-9.446e-07	-9.279e-07			-7.796e-07	-6.644e-07	-6.356e-07	-5.708e-07	-6.006e-07	-5.21e-07	-5.112e-07	-4.942e-07	-5.103e-07	-4.712e-07		-5.728e-06	-4.9e-06	-4.808e-06
-0.3716		-1.0514e-06	-9.786e-07	-9.242e-07	-9.249e-07	-9.131e-07	-8.988e-07	-8.793e-07	-8.651e-07	-9.786e-07	-9.249e-07		-1.2245e-06	-1.0979e-06	-8.982e-07	-8.595e-07	-8.418e-07	-7.888e-07	-7.188e-07	-7.072e-07	-7.805e-07	-7.937e-07		-4.879e-07	-4.586e-07	-4.668e-07	-4.627e-07	-5.423e-07	-1.2463e-06	-8.862e-07	-8.239e-07	-7.868e-07	-7.623e-07			-5.444e-07	-4.315e-07	-4.03e-07	-3.513e-07	-3.892e-07	-2.975e-07	-2.935e-07	-2.778e-07	-2.983e-07	-2.655e-07		-5.104e-06	-4.383e-06	-4.291e-06
-0.3664		-9.628e-07	-8.731e-07	-8.406e-07	-8.234e-07	-8.063e-07	-7.971e-07	-7.802e-07	-7.804e-07	-8.731e-07	-8.234e-07		-8.981e-07	-7.882e-07	-5.982e-07	-5.596e-07	-5.494e-07	-5.022e-07	-4.423e-07	-4.23e-07	-5.094e-07	-5.243e-07		-3.719e-07	-3.445e-07	-3.479e-07	-3.529e-07	-4.303e-07	-1.0669e-06	-7.293e-07	-6.804e-07	-6.367e-07	-6.249e-07			-3.523e-07	-2.337e-07	-2.162e-07	-1.607e-07	-2.073e-07	-1.154e-07	-1.056e-07	-9.84e-08	-1.13e-07	-8.13e-08		-4.612e-06	-3.805e-06	-3.746e-06
-0.3597		-8.556e-07	-7.762e-07	-7.407e-07	-7.351e-07	-7.159e-07	-7.117e-07	-6.903e-07	-6.888e-07	-7.762e-07	-7.351e-07		-6.154e-07	-5.048e-07	-3.251e-07	-2.911e-07	-2.896e-07	-2.514e-07	-1.915e-07	-1.738e-07	-2.588e-07	-2.854e-07		-2.66e-07	-2.383e-07	-2.43e-07	-2.487e-07	-3.26e-07	-9.103e-07	-5.928e-07	-5.427e-07	-5.033e-07	-4.915e-07			-1.821e-07	3.2767e-07	3.2767e-07	3.2767e-07	3.2767e-07	3.2767e-07	3.2767e-07	3.2767e-07	3.2767e-07	3.2767e-07		-4.123e-06	-3.352e-06	-3.243e-06
-0.3541		-7.708e-07	-7.093e-07	-6.544e-07	-6.591e-07	-6.491e-07	-6.366e-07	-6.112e-07	-6.007e-07	-7.093e-07	-6.591e-07		-3.431e-07	-2.562e-07	-7.34e-08	-5.42e-08	-5.88e-08	-2.08e-08	2.153e-07	2.2312e-07	-4.36e-08	-6.68e-08		-1.699e-07	3.0582e-07	3.0548e-07	-1.529e-07	-2.321e-07	-7.699e-07	-4.681e-07	-4.134e-07	-3.894e-07	-3.675e-07			3.2767e-07	9.2e-08	1.12e-07	1.543e-07	9.75e-08	1.946e-07	1.985e-07	2.11e-07	1.877e-07	2.076e-07		-3.616e-06	-2.904e-06	-2.815e-06
-0.351		-7.045e-07	-6.258e-07	-5.971e-07	-5.783e-07	-5.651e-07	-5.537e-07	-5.417e-07	-5.422e-07	-6.258e-07	-5.783e-07		-1.125e-07	-4.31e-08	2.9784e-07	3.1256e-07	3.0628e-07	3.2767e-07	3.2767e-07	3.2767e-07	3.0703e-07	2.8282e-07		3.2767e-07	-6.27e-08	-6.66e-08	3.2767e-07	3.02e-07	-6.347e-07	-3.559e-07	-3.174e-07	-2.844e-07	-2.714e-07			9.23e-08	3.2767e-07	3.2767e-07	3.2767e-07	3.2767e-07	3.2767e-07	3.2767e-07	3.2767e-07	3.2767e-07	3.2767e-07		-3.226e-06	-2.433e-06	-2.365e-06
-0.3417		-6.281e-07	-5.479e-07	-5.158e-07	-5.081e-07	-4.906e-07	-4.892e-07	-4.64e-07	-4.673e-07	-5.479e-07	-5.081e-07		2.6122e-07	3.1534e-07	3.252e-07	3.396e-07	3.188e-07	3.41e-07	3.981e-07	4.094e-07	3.085e-07	2.71e-07		-1.2e-08	3.2767e-07	3.2767e-07	2e-10	-6.91e-08	-5.201e-07	-2.598e-07	-2.122e-07	-1.834e-07	-1.725e-07			3.2767e-07	2.922e-07	3.107e-07	3.517e-07	2.862e-07	3.741e-07	3.844e-07	3.925e-07	3.702e-07	3.797e-07		-2.819e-06	-2.071e-06	-1.9532e-06
-0.3356		-5.56e-07	-4.956e-07	-4.47e-07	-4.559e-07	-4.462e-07	-4.339e-07	-4.05e-07	-3.984e-07	-4.956e-07	-4.559e-07		3.2767e-07	3.172e-07	4.831e-07	4.821e-07	4.555e-07	4.805e-07	5.343e-07	5.322e-07	4.319e-07	4.024e-07		3.2767e-07	7.69e-08	6.19e-08	3.2767e-07	3.2767e-07	-4.145e-07	-1.646e-07	3.2767e-07	3.2767e-07	3.2767e-07			2.717e-07	3.584e-07	3.672e-07	3.965e-07	3.347e-07	4.232e-07	4.303e-07	4.36e-07	4.183e-07	4.24e-07		-2.42e-06	-1.7012e-06	-1.5911e-06
-0.3305		-4.935e-07	-4.347e-07	-3.987e-07	-3.871e-07	-3.747e-07	-3.64e-07	-3.548e-07	-3.588e-07	-4.347e-07	-3.871e-07		4.115e-07	4.457e-07	6.044e-07	6.042e-07	5.752e-07	5.903e-07	6.364e-07	6.431e-07	5.397e-07	5.017e-07		1.043e-07	3.2767e-07	3.2767e-07	1.219e-07	5.77e-08	-3.149e-07	3.2767e-07	-3.9e-08	-8.7e-09	3.7e-09			3.189e-07	4.136e-07	4.185e-07	4.451e-07	3.853e-07	4.671e-07	4.79e-07	4.814e-07	4.579e-07	4.684e-07		-2.1201e-06	-1.3711e-06	-1.2522e-06
-0.3243		-4.379e-07	-3.663e-07	-3.358e-07	-3.316e-07	-3.141e-07	-3.168e-07	-2.932e-07	-2.941e-07	-3.663e-07	-3.316e-07		5.19e-07	5.565e-07	7.056e-07	7.034e-07	6.674e-07	6.744e-07	7.235e-07	7.265e-07	6.291e-07	5.873e-07		3.2767e-07	1.807e-07	1.756e-07	3.2767e-07	3.2767e-07	-2.243e-07	6.7e-09	3.2767e-07	3.2767e-07	3.2767e-07			3.67e-07	4.507e-07	4.61e-07	4.882e-07	4.249e-07	5.036e-07	5.099e-07	5.152e-07	4.924e-07	4.962e-07		-1.8308e-06	-1.0817e-06	-9.513e-07
-0.3176		-3.836e-07	-3.213e-07	-2.784e-07	-2.895e-07	-2.814e-07	-2.726e-07	-2.467e-07	-2.36e-07	-3.213e-07	-2.895e-07		6.148e-07	6.365e-07	7.89e-07	7.743e-07	7.357e-07	7.488e-07	7.935e-07	7.887e-07	6.939e-07	6.596e-07		2.109e-07	3.2767e-07	3.2767e-07	2.196e-07	1.678e-07	3.2767e-07	3.2767e-07	1.139e-07	1.368e-07	1.418e-07			4.121e-07	4.864e-07	4.919e-07	5.111e-07	4.544e-07	5.289e-07	5.334e-07	5.345e-07	5.194e-07	5.178e-07		-1.5744e-06	-8.233e-07	-6.853e-07
-0.3091		-3.326e-07	-2.757e-07	-2.369e-07	-2.316e-07	-2.228e-07	-2.18e-07	-2.047e-07	8.616e-08	-2.757e-07	-2.316e-07		6.828e-07	7.032e-07	8.43e-07	8.344e-07	7.948e-07	8.01e-07	8.41e-07	8.434e-07	7.486e-07	7.117e-07		3.2767e-07	2.644e-07	2.63e-07	3.2767e-07	3.2767e-07	-5.15e-08	1.456e-07	3.2767e-07	3.2767e-07	3.2767e-07			4.411e-07	5.144e-07	5.141e-07	5.358e-07	4.748e-07	5.489e-07	5.575e-07	5.595e-07	5.37e-07	5.406e-07		-1.3487e-06	-5.986e-07	-4.541e-07
-0.3058		-2.932e-07	-2.192e-07	7.688e-08	8.393e-08	9.485e-08	9.864e-08	1.1628e-07	1.4326e-07	-2.192e-07	8.393e-08		7.326e-07	7.561e-07	8.875e-07	8.772e-07	8.363e-07	8.374e-07	8.801e-07	8.824e-07	7.921e-07	7.544e-07		2.872e-07	2.992e-07	2.941e-07	2.99e-07	2.547e-07	3.2767e-07	3.2767e-07	2.336e-07	2.559e-07	2.58e-07			4.657e-07	5.336e-07	5.365e-07	5.566e-07	5.006e-07	5.639e-07	5.686e-07	5.756e-07	5.596e-07	5.534e-07		-1.1548e-06	-4.154e-07	-2.645e-07
-0.2995		-2.453e-07	8.158e-08	1.331e-07	1.406e-07	1.5338e-07	1.5678e-07	1.7674e-07	1.8798e-07	8.158e-08	1.406e-07		7.781e-07	7.936e-07	9.268e-07	9.068e-07	8.669e-07	8.756e-07	9.167e-07	9.126e-07	8.261e-07	7.982e-07		3.212e-07	3.337e-07	3.27e-07	3.309e-07	2.922e-07	8.62e-08	2.662e-07	3.2767e-07	2.947e-07	3.05e-07			4.998e-07	5.583e-07	5.585e-07	5.69e-07	5.166e-07	5.811e-07	5.849e-07	5.87e-07	5.677e-07	5.661e-07		-9.827e-07	-2.562e-07	-1.1e-07
-0.2928		-2.04e-07	1.3116e-07	1.7224e-07	1.793e-07	1.9274e-07	1.9648e-07	2.1563e-07	2.2344e-07	1.3116e-07	1.793e-07		8.064e-07	8.222e-07	9.421e-07	9.322e-07	8.932e-07	8.951e-07	9.347e-07	9.346e-07	8.528e-07	8.196e-07		3.421e-07	3.601e-07	3.552e-07	3.608e-07	3.204e-07	3.2767e-07	3.047e-07	3.372e-07	3.368e-07	3.464e-07			5.179e-07	5.741e-07	5.68e-07	5.831e-07	5.328e-07	5.894e-07	5.961e-07	5.963e-07	5.786e-07	5.81e-07		-8.45e-07	-1.34e-07	2.509e-07
-0.2886		7.937e-08	1.7104e-07	2.0694e-07	2.147e-07	2.2828e-07	2.3147e-07	2.5022e-07	2.564e-07	1.7104e-07	2.147e-07		8.283e-07	8.451e-07	9.585e-07	9.489e-07	9.132e-07	9.112e-07	9.465e-07	9.488e-07	8.763e-07	8.437e-07		3.793e-07	3.91e-07	3.9e-07	3.89e-07	3.527e-07	1.94e-07	3.425e-07	3.733e-07	3.88e-07	3.882e-07			5.337e-07	5.831e-07	5.83e-07	5.988e-07	5.512e-07	5.986e-07	6.029e-07	6.041e-07	5.91e-07	5.881e-07		-7.313e-07	2.1026e-07	3.2767e-07
-0.2816		1.2792e-07	2.0491e-07	2.4028e-07	2.4797e-07	2.6024e-07	2.6378e-07	2.826e-07	2.884e-07	2.0491e-07	2.4797e-07		8.498e-07	8.596e-07	9.751e-07	9.573e-07	9.218e-07	9.302e-07	9.649e-07	9.614e-07	8.914e-07	8.702e-07		4.069e-07	4.219e-07	4.152e-07	4.189e-07	3.908e-07	3.2767e-07	3.928e-07	4.13e-07	4.244e-07	4.345e-07			5.556e-07	5.961e-07	5.948e-07	6.044e-07	5.577e-07	6.112e-07	6.065e-07	6.139e-07	5.944e-07	5.916e-07		-6.215e-07	3.1208e-07	1.819e-07
-0.2757		1.6291e-07	2.3418e-07	2.6894e-07	2.7629e-07	2.8911e-07	2.9206e-07	2.23e-08	2.36e-08	2.3418e-07	2.7629e-07		8.615e-07	8.734e-07	9.786e-07	9.712e-07	9.356e-07	9.395e-07	9.719e-07	9.729e-07	9.06e-07	8.801e-07		4.227e-07	4.427e-07	4.419e-07	4.404e-07	4.093e-07	2.956e-07	4.271e-07	4.498e-07	4.589e-07	4.647e-07			5.668e-07	6.086e-07	5.995e-07	6.078e-07	5.677e-07	6.133e-07	6.147e-07	6.187e-07	6.052e-07	6.038e-07		-5.375e-07	1.012e-07	3.2767e-07
-0.271		1.9289e-07	2.6496e-07	1.61e-08	2.64e-08	3.59e-08	4.14e-08	2.7925e-07	2.8322e-07	2.6496e-07	2.64e-08		8.699e-07	8.896e-07	9.875e-07	9.785e-07	9.476e-07	9.477e-07	9.797e-07	9.838e-07	9.217e-07	8.985e-07		4.507e-07	4.674e-07	4.623e-07	4.675e-07	4.375e-07	3.271e-07	4.63e-07	4.828e-07	5.016e-07	5.032e-07			5.776e-07	6.154e-07	6.128e-07	6.208e-07	5.829e-07	6.211e-07	6.254e-07	6.264e-07	6.078e-07	6.125e-07		-4.591e-07	3.2767e-07	2.707e-07
-0.2634		2.2195e-07	2.9186e-07	2.6786e-07	2.7489e-07	2.8347e-07	2.8666e-07	7.62e-08	8.16e-08	2.9186e-07	2.7489e-07		8.856e-07	8.979e-07	9.963e-07	9.798e-07	9.505e-07	9.576e-07	9.909e-07	9.873e-07	9.307e-07	9.167e-07		4.738e-07	4.901e-07	4.849e-07	4.89e-07	4.681e-07	3.674e-07	4.994e-07	5.234e-07	5.3e-07	5.367e-07			5.958e-07	6.255e-07	6.184e-07	6.244e-07	5.886e-07	6.321e-07	6.232e-07	6.282e-07	6.132e-07	6.119e-07		-3.829e-07	1.854e-07	2.872e-07
-0.2578		2.4814e-07	3.51e-08	7.35e-08	6.78e-08	7.87e-08	8.52e-08	3.1932e-07	3.235e-07	3.51e-08	6.78e-08		8.968e-07	9.056e-07	9.942e-07	9.876e-07	9.61e-07	9.657e-07	9.895e-07	9.905e-07	9.395e-07	9.215e-07		4.925e-07	5.072e-07	5.04e-07	5.061e-07	4.858e-07	4.05e-07	5.284e-07	5.489e-07	5.597e-07	5.62e-07			6.01e-07	6.315e-07	6.216e-07	6.28e-07	5.968e-07	6.293e-07	6.345e-07	6.342e-07	6.205e-07	6.228e-07		-3.258e-07	3.2767e-07	3.128e-07
-0.2557		2.7318e-07	2.8208e-07	3.0417e-07	3.1107e-07	3.2064e-07	3.2399e-07	1.214e-07	1.154e-07	2.8208e-07	3.1107e-07		8.982e-07	9.154e-07	9.967e-07	9.899e-07	9.656e-07	9.666e-07	9.929e-07	9.989e-07	9.493e-07	9.304e-07		5.11e-07	5.269e-07	5.239e-07	5.283e-07	5.087e-07	4.392e-07	5.538e-07	5.755e-07	5.912e-07	5.967e-07			6.078e-07	6.328e-07	6.316e-07	6.37e-07	6.078e-07	6.362e-07	6.375e-07	6.436e-07	6.263e-07	6.268e-07		-2.608e-07	2.45e-07	3.268e-07
-0.2449		3.8e-08	9.61e-08	1.163e-07	1.248e-07	1.281e-07	1.371e-07	3.2767e-07	3.2767e-07	9.61e-08	1.248e-07		9.088e-07	9.2e-07	1.0015e-06	9.882e-07	9.625e-07	9.73e-07	9.997e-07	9.967e-07	9.512e-07	9.42e-07		5.304e-07	5.439e-07	5.388e-07	5.447e-07	5.334e-07	4.692e-07	5.859e-07	6.058e-07	6.144e-07	6.179e-07			6.212e-07	6.386e-07	6.339e-07	6.378e-07	6.076e-07	6.438e-07	6.35e-07	6.408e-07	6.296e-07	6.25e-07		-1.982e-07	2.66e-07	3.42e-07
-0.2395		2.6776e-07	3.181e-07	3.2767e-07	3.2767e-07	3.2767e-07	3.2767e-07	1.694e-07	1.665e-07	3.181e-07	3.2767e-07		9.164e-07	9.27e-07	1.0028e-06	9.949e-07	9.732e-07	9.804e-07	1.0002e-06	1.0031e-06	9.594e-07	9.48e-07		5.479e-07	5.604e-07	5.57e-07	5.619e-07	5.471e-07	5.113e-07	6.162e-07	6.287e-07	6.447e-07	6.462e-07			6.291e-07	6.502e-07	6.39e-07	6.424e-07	6.165e-07	6.466e-07	6.444e-07	6.484e-07	6.331e-07	6.367e-07		1.1611e-07	2.978e-07	3.628e-07
-0.23485		9.2e-08	1.336e-07	1.532e-07	1.576e-07	1.691e-07	1.68e-07	3.2767e-07	3.2767e-07	1.336e-07	1.576e-07		9.151e-07	9.324e-07	9.97e-07	9.895e-07	9.731e-07	9.688e-07	9.925e-07	1.001e-06	9.644e-07	9.483e-07		5.634e-07	5.762e-07	5.743e-07	5.833e-07	5.658e-07	5.306e-07	6.351e-07	6.529e-07	6.656e-07	6.762e-07			6.313e-07	6.493e-07	6.433e-07	6.5e-07	6.257e-07	6.487e-07	6.467e-07	6.55e-07	6.414e-07	6.398e-07		1.7984e-07	3.112e-07	3.704e-07
-0.22857		2.9827e-07	3.2767e-07	3.2767e-07	3.2767e-07	3.2767e-07	3.2767e-07	1.976e-07	1.993e-07	3.2767e-07	3.2767e-07		9.212e-07	9.287e-07	9.976e-07	9.851e-07	9.666e-07	9.738e-07	9.947e-07	9.933e-07	9.586e-07	9.535e-07		5.773e-07	5.934e-07	5.839e-07	5.948e-07	5.883e-07	5.589e-07	6.629e-07	6.754e-07	6.889e-07	6.918e-07			6.444e-07	6.542e-07	6.491e-07	6.498e-07	6.274e-07	6.579e-07	6.444e-07	6.484e-07	6.416e-07	6.374e-07		2.2989e-07	3.317e-07	3.826e-07
-0.2225		1.27e-07	1.696e-07	1.875e-07	1.877e-07	1.91e-07	1.997e-07	3.2767e-07	3.2767e-07	1.696e-07	1.877e-07		9.237e-07	9.294e-07	9.912e-07	9.859e-07	9.683e-07	9.745e-07	9.889e-07	9.949e-07	9.598e-07	9.521e-07		5.886e-07	6.031e-07	6.034e-07	6.053e-07	6.034e-07	5.911e-07	6.817e-07	6.909e-07	7.068e-07	7.116e-07			6.438e-07	6.572e-07	6.474e-07	6.511e-07	6.318e-07	6.515e-07	6.512e-07	6.558e-07	6.421e-07	6.468e-07		2.7307e-07	3.525e-07	3.953e-07
-0.21361		3.2767e-07	3.2767e-07	3.2767e-07	3.2767e-07	3.2767e-07	3.2767e-07	2.287e-07	2.235e-07	3.2767e-07	3.2767e-07		9.186e-07	9.353e-07	9.848e-07	9.82e-07	9.658e-07	9.67e-07	9.85e-07	9.913e-07	9.643e-07	9.512e-07		6.03e-07	6.15e-07	6.127e-07	6.229e-07	6.165e-07	6.069e-07	6.982e-07	7.144e-07	7.282e-07	7.34e-07			6.489e-07	6.602e-07	6.555e-07	6.588e-07	6.41e-07	6.57e-07	6.556e-07	6.624e-07	6.536e-07	6.52e-07		4.41e-08	3.633e-07	4.06e-07
-0.2105		1.554e-07	1.983e-07	2.154e-07	2.259e-07	2.3e-07	2.432e-07	3.2767e-07	3.2767e-07	1.983e-07	2.259e-07		9.206e-07	9.307e-07	9.865e-07	9.756e-07	9.619e-07	9.689e-07	9.865e-07	9.843e-07	9.586e-07	9.561e-07		6.182e-07	6.275e-07	6.243e-07	6.336e-07	6.319e-07	6.343e-07	7.186e-07	7.349e-07	7.44e-07	7.481e-07			6.604e-07	6.672e-07	6.607e-07	6.578e-07	6.391e-07	6.648e-07	6.545e-07	6.611e-07	6.462e-07	6.484e-07		2.9433e-07	3.787e-07	4.104e-07
-0.20383		3.2767e-07	3.2767e-07	3.2767e-07	3.2767e-07	3.2767e-07	2.418e-07	2.651e-07	2.622e-07	3.2767e-07	3.2767e-07		9.242e-07	9.308e-07	9.786e-07	9.752e-07	9.626e-07	9.648e-07	9.805e-07	9.872e-07	9.598e-07	9.541e-07		6.246e-07	6.355e-07	6.412e-07	6.436e-07	6.475e-07	6.619e-07	7.398e-07	7.496e-07	7.595e-07	7.659e-07			6.641e-07	6.671e-07	6.623e-07	6.635e-07	6.488e-07	6.616e-07	6.603e-07	6.623e-07	6.528e-07	6.575e-07		1.135e-07	3.984e-07	4.209e-07
-0.19772		2.003e-07	2.268e-07	2.489e-07	2.413e-07	2.527e-07	3.2767e-07	2.658e-07	2.708e-07	2.268e-07	2.413e-07		9.192e-07	9.378e-07	9.732e-07	9.758e-07	9.626e-07	9.62e-07	9.781e-07	9.824e-07	9.663e-07	9.529e-07		6.364e-07	6.5e-07	6.492e-07	6.565e-07	6.54e-07	6.762e-07	7.502e-07	7.688e-07	7.784e-07	7.85e-07			6.697e-07	6.687e-07	6.674e-07	6.691e-07	6.595e-07	6.657e-07	6.641e-07	6.728e-07	6.64e-07	6.614e-07		3.2767e-07	4.039e-07	4.326e-07
-0.19258		3.2767e-07	3.2767e-07	2.5e-07	3.2767e-07	2.659e-07	2.83e-07	2.819e-07	2.8e-07	3.2767e-07	3.2767e-07		9.279e-07	9.334e-07	9.779e-07	9.7e-07	9.599e-07	9.681e-07	9.826e-07	9.803e-07	9.62e-07	9.629e-07		6.472e-07	6.61e-07	6.587e-07	6.666e-07	6.74e-07	6.983e-07	7.687e-07	7.808e-07	7.921e-07	7.982e-07			6.739e-07	6.758e-07	6.724e-07	6.715e-07	6.567e-07	6.779e-07	6.662e-07	6.7e-07	6.606e-07	6.62e-07		1.86e-07	4.19e-07	4.37e-07
-0.18631		2.222e-07	2.552e-07	2.638e-07	2.785e-07	2.815e-07	2.89e-07	2.998e-07	2.882e-07	2.552e-07	2.785e-07		9.303e-07	9.365e-07	9.722e-07	9.731e-07	9.62e-07	9.69e-07	9.795e-07	9.844e-07	9.641e-07	9.618e-07		6.561e-07	6.682e-07	6.743e-07	6.764e-07	6.846e-07	7.214e-07	7.857e-07	7.947e-07	8.082e-07	8.087e-07			6.787e-07	6.774e-07	6.694e-07	6.738e-07	6.618e-07	6.716e-07	6.698e-07	6.739e-07	6.675e-07	6.712e-07		3.2767e-07	4.386e-07	4.509e-07
-0.18045		3.2767e-07	2.602e-07	2.823e-07	2.759e-07	2.851e-07	2.972e-07	3.085e-07	3.035e-07	2.602e-07	2.759e-07		9.307e-07	9.471e-07	9.765e-07	9.787e-07	9.696e-07	9.693e-07	9.835e-07	9.881e-07	9.762e-07	9.679e-07		6.691e-07	6.834e-07	6.839e-07	6.926e-07	6.957e-07	7.372e-07	7.958e-07	8.163e-07	8.273e-07	8.341e-07			6.862e-07	6.793e-07	6.794e-07	6.827e-07	6.753e-07	6.818e-07	6.811e-07	6.869e-07	6.752e-07	6.799e-07		2.456e-07	4.489e-07	4.645e-07
-0.1762		2.399e-07	2.746e-07	2.82e-07	2.969e-07	3e-07	3.135e-07	3.118e-07	3.124e-07	2.746e-07	2.969e-07		9.394e-07	9.426e-07	9.794e-07	9.701e-07	9.656e-07	9.706e-07	9.854e-07	9.843e-07	9.708e-07	9.759e-07		6.822e-07	6.894e-07	6.888e-07	7.021e-07	7.122e-07	7.53e-07	8.101e-07	8.249e-07	8.323e-07	8.428e-07			6.908e-07	6.879e-07	6.854e-07	6.822e-07	6.772e-07	6.893e-07	6.764e-07	6.81e-07	6.728e-07	6.798e-07		2.687e-07	4.622e-07	4.662e-07
-0.16797		3.2767e-07	2.885e-07	2.955e-07	3.086e-07	3.15e-07	3.294e-07	3.302e-07	3.258e-07	2.885e-07	3.086e-07		9.443e-07	9.475e-07	9.76e-07	9.774e-07	9.696e-07	9.759e-07	9.82e-07	9.876e-07	9.763e-07	9.747e-07		6.845e-07	6.986e-07	7.028e-07	7.066e-07	7.171e-07	7.745e-07	8.27e-07	8.353e-07	8.497e-07	8.508e-07			6.967e-07	6.888e-07	6.825e-07	6.863e-07	6.813e-07	6.872e-07	6.818e-07	6.882e-07	6.816e-07	6.835e-07		2.873e-07	4.784e-07	4.832e-07
-0.16251		2.779e-07	2.93e-07	3.139e-07	3.041e-07	3.147e-07	3.237e-07	3.451e-07	3.365e-07	2.93e-07	3.041e-07		9.456e-07	9.556e-07	9.789e-07	9.816e-07	9.759e-07	9.771e-07	9.856e-07	9.894e-07	9.842e-07	9.809e-07		6.995e-07	7.134e-07	7.082e-07	7.158e-07	7.269e-07	7.848e-07	8.328e-07	8.52e-07	8.638e-07	8.702e-07			6.978e-07	6.913e-07	6.929e-07	6.95e-07	6.909e-07	6.921e-07	6.883e-07	6.978e-07	6.904e-07	6.874e-07		3.137e-07	4.867e-07	4.953e-07
-0.1602		2.811e-07	3.04e-07	3.138e-07	3.256e-07	3.283e-07	3.425e-07	3.413e-07	3.362e-07	3.04e-07	3.256e-07		9.54e-07	9.565e-07	9.85e-07	9.784e-07	9.741e-07	9.835e-07	9.922e-07	9.918e-07	9.836e-07	9.899e-07		7.064e-07	7.193e-07	7.166e-07	7.316e-07	7.427e-07	8.025e-07	8.473e-07	8.611e-07	8.729e-07	8.858e-07			7.067e-07	7.012e-07	6.974e-07	6.946e-07	6.972e-07	7.017e-07	6.903e-07	6.982e-07	6.937e-07	6.946e-07		3.434e-07	4.984e-07	5.004e-07
-0.14995		2.873e-07	3.185e-07	3.269e-07	3.384e-07	3.46e-07	3.601e-07	3.598e-07	3.522e-07	3.185e-07	3.384e-07		9.59e-07	9.628e-07	9.846e-07	9.866e-07	9.811e-07	9.884e-07	9.922e-07	9.985e-07	9.906e-07	9.921e-07		7.107e-07	7.235e-07	7.286e-07	7.32e-07	7.491e-07	8.242e-07	8.646e-07	8.677e-07	8.86e-07	8.911e-07			7.131e-07	7.04e-07	6.97e-07	7.007e-07	6.973e-07	7.055e-07	6.98e-07	7.017e-07	6.933e-07	7.015e-07		3.638e-07	5.156e-07	5.19e-07
-0.14397		3.121e-07	3.275e-07	3.449e-07	3.317e-07	3.436e-07	3.493e-07	3.751e-07	3.687e-07	3.275e-07	3.317e-07		9.634e-07	9.736e-07	9.906e-07	9.919e-07	9.881e-07	9.878e-07	9.97e-07	1.0037e-06	1.0004e-06	9.994e-07		7.272e-07	7.368e-07	7.373e-07	7.457e-07	7.561e-07	8.349e-07	8.692e-07	8.826e-07	9.018e-07	9.044e-07			7.206e-07	7.079e-07	7.033e-07	7.068e-07	7.097e-07	7.096e-07	7.026e-07	7.132e-07	7.025e-07	7.07e-07		3.845e-07	5.256e-07	5.308e-07
-0.13707		3.174e-07	3.326e-07	3.493e-07	3.533e-07	3.55e-07	3.718e-07	3.689e-07	3.681e-07	3.326e-07	3.533e-07		9.725e-07	9.758e-07	9.971e-07	9.914e-07	9.902e-07	9.979e-07	1.0032e-06	1.004e-06	1.0047e-06	1.0094e-06		7.331e-07	7.441e-07	7.423e-07	7.583e-07	7.736e-07	8.512e-07	8.828e-07	8.963e-07	9.085e-07	9.195e-07			7.249e-07	7.159e-07	7.14e-07	7.123e-07	7.145e-07	7.182e-07	7.046e-07	7.145e-07	7.104e-07	7.099e-07		4.107e-07	5.374e-07	5.413e-07
-0.13284		3.183e-07	3.486e-07	3.504e-07	3.666e-07	3.729e-07	3.865e-07	3.904e-07	3.824e-07	3.486e-07	3.666e-07		9.807e-07	9.821e-07	9.974e-07	1.0009e-06	9.994e-07	1.0058e-06	1.0071e-06	1.013e-06	1.0102e-06	1.0124e-06		7.374e-07	7.511e-07	7.566e-07	7.61e-07	7.79e-07	8.723e-07	8.953e-07	9.048e-07	9.196e-07	9.228e-07			7.272e-07	7.224e-07	7.149e-07	7.174e-07	7.129e-07	7.22e-07	7.137e-07	7.193e-07	7.126e-07	7.139e-07		4.314e-07	5.53e-07	5.602e-07
-0.12668		3.421e-07	3.651e-07	3.712e-07	3.665e-07	3.763e-07	3.794e-07	3.983e-07	3.944e-07	3.651e-07	3.665e-07		9.893e-07	9.987e-07	1.0084e-06	1.0114e-06	1.0092e-06	1.0115e-06	1.0157e-06	1.0264e-06	1.0246e-06	1.0252e-06		7.532e-07	7.668e-07	7.693e-07	7.788e-07	7.924e-07	8.896e-07	9.072e-07	9.239e-07	9.404e-07	9.414e-07			7.398e-07	7.251e-07	7.221e-07	7.263e-07	7.308e-07	7.244e-07	7.235e-07	7.339e-07	7.285e-07	7.296e-07		4.549e-07	5.656e-07	5.793e-07
-0.11835		3.5e-07	3.591e-07	3.813e-07	3.791e-07	3.845e-07	4.011e-07	3.938e-07	4.04e-07	3.591e-07	3.791e-07		9.946e-07	1.0008e-06	1.0144e-06	1.0101e-06	1.0098e-06	1.0181e-06	1.025e-06	1.0237e-06	1.028e-06	1.0329e-06		7.558e-07	7.711e-07	7.722e-07	7.897e-07	8.047e-07	8.958e-07	9.169e-07	9.313e-07	9.402e-07	9.546e-07			7.506e-07	7.356e-07	7.316e-07	7.309e-07	7.312e-07	7.378e-07	7.274e-07	7.368e-07	7.258e-07	7.286e-07		4.806e-07	5.77e-07	5.878e-07
-0.11498		3.5e-07	3.737e-07	3.787e-07	3.958e-07	4.016e-07	4.099e-07	4.15e-07	4.091e-07	3.737e-07	3.958e-07		1.0066e-06	1.0056e-06	1.0175e-06	1.0195e-06	1.0223e-06	1.0233e-06	1.0268e-06	1.034e-06	1.033e-06	1.0353e-06		7.635e-07	7.794e-07	7.88e-07	7.948e-07	8.077e-07	9.206e-07	9.275e-07	9.339e-07	9.533e-07	9.587e-07			7.513e-07	7.438e-07	7.349e-07	7.373e-07	7.375e-07	7.402e-07	7.364e-07	7.388e-07	7.31e-07	7.358e-07		4.969e-07	5.952e-07	6.025e-07
-0.10908		3.679e-07	3.918e-07	3.975e-07	3.959e-07	4.083e-07	4.097e-07	4.274e-07	4.222e-07	3.918e-07	3.959e-07		1.0097e-06	1.0168e-06	1.0226e-06	1.0278e-06	1.0291e-06	1.0294e-06	1.0326e-06	1.0403e-06	1.0445e-06	1.043e-06		7.752e-07	7.938e-07	8.047e-07	8.098e-07	8.201e-07	9.316e-07	9.393e-07	9.56e-07	9.721e-07	9.693e-07			7.608e-07	7.475e-07	7.444e-07	7.482e-07	7.512e-07	7.437e-07	7.426e-07	7.511e-07	7.449e-07	7.454e-07		5.13e-07	6.038e-07	6.188e-07
-0.10247		3.782e-07	3.865e-07	4.089e-07	4.048e-07	4.088e-07	4.226e-07	4.249e-07	4.358e-07	3.865e-07	4.048e-07		1.022e-06	1.0242e-06	1.0322e-06	1.0323e-06	1.0329e-06	1.0387e-06	1.0465e-06	1.0438e-06	1.0497e-06	1.056e-06		7.827e-07	8.059e-07	8.075e-07	8.216e-07	8.306e-07	9.454e-07	9.508e-07	9.703e-07	9.765e-07	9.839e-07			7.691e-07	7.602e-07	7.54e-07	7.532e-07	7.539e-07	7.615e-07	7.498e-07	7.576e-07	7.474e-07	7.504e-07		5.433e-07	6.154e-07	6.328e-07
-0.09764		3.761e-07	3.996e-07	4.02e-07	4.186e-07	4.284e-07	4.37e-07	4.342e-07	4.333e-07	3.996e-07	4.186e-07		1.0325e-06	1.0292e-06	1.0389e-06	1.0431e-06	1.0443e-06	1.0491e-06	1.0484e-06	1.0556e-06	1.0547e-06	1.0609e-06		7.9e-07	8.128e-07	8.226e-07	8.304e-07	8.346e-07	9.644e-07	9.645e-07	9.786e-07	9.896e-07	9.905e-07			7.743e-07	7.709e-07	7.584e-07	7.585e-07	7.592e-07	7.632e-07	7.633e-07	7.615e-07	7.524e-07	7.627e-07		5.601e-07	6.366e-07	6.519e-07
-0.09046		3.98e-07	4.158e-07	4.252e-07	4.268e-07	4.37e-07	4.455e-07	4.528e-07	4.467e-07	4.158e-07	4.268e-07		1.036e-06	1.0432e-06	1.0477e-06	1.052e-06	1.0513e-06	1.0537e-06	1.0576e-06	1.0658e-06	1.0702e-06	1.0706e-06		8.056e-07	8.298e-07	8.387e-07	8.514e-07	8.464e-07	9.779e-07	9.776e-07	9.967e-07	1.0089e-06	1.0106e-06			7.832e-07	7.75e-07	7.702e-07	7.739e-07	7.712e-07	7.727e-07	7.762e-07	7.77e-07	7.662e-07	7.722e-07		5.809e-07	6.504e-07	6.697e-07
-0.08501		4.068e-07	4.075e-07	4.368e-07	4.293e-07	4.357e-07	4.462e-07	4.567e-07	4.637e-07	4.075e-07	4.293e-07		1.049e-06	1.0496e-06	1.0593e-06	1.0579e-06	1.0572e-06	1.0642e-06	1.0724e-06	1.0684e-06	1.0766e-06	1.083e-06		8.107e-07	8.472e-07	8.484e-07	8.674e-07	8.532e-07	9.898e-07	9.901e-07	1.0044e-06	1.0178e-06	1.0257e-06			7.95e-07	7.914e-07	7.774e-07	7.806e-07	7.744e-07	7.886e-07	7.782e-07	7.838e-07	7.727e-07	7.757e-07		6.063e-07	6.658e-07	6.804e-07
-0.08123		4.041e-07	4.265e-07	4.28e-07	4.459e-07	4.528e-07	4.658e-07	4.655e-07	4.56e-07	4.265e-07	4.459e-07		1.0622e-06	1.0568e-06	1.0649e-06	1.0696e-06	1.0709e-06	1.0764e-06	1.075e-06	1.0825e-06	1.0838e-06	1.0881e-06		8.202e-07	8.547e-07	8.704e-07	8.79e-07	8.607e-07	1.011e-06	1.0077e-06	1.0219e-06	1.034e-06	1.0316e-06			7.98e-07	8.013e-07	7.849e-07	7.905e-07	7.862e-07	7.983e-07	7.98e-07	7.939e-07	7.805e-07	7.895e-07		6.224e-07	6.885e-07	7.027e-07
-0.07203		4.213e-07	4.437e-07	4.467e-07	4.53e-07	4.628e-07	4.701e-07	4.81e-07	4.763e-07	4.437e-07	4.53e-07		1.0671e-06	1.0706e-06	1.0742e-06	1.0795e-06	1.0783e-06	1.0816e-06	1.0858e-06	1.0929e-06	1.0995e-06	1.0988e-06		8.358e-07	8.766e-07	8.879e-07	8.988e-07	8.737e-07	1.0229e-06	1.018e-06	1.0425e-06	1.0562e-06	1.0508e-06			8.055e-07	8.075e-07	7.957e-07	8.074e-07	7.942e-07	8.096e-07	8.05e-07	8.12e-07	7.948e-07	7.986e-07		6.469e-07	7.011e-07	7.213e-07
-0.06626		4.315e-07	4.363e-07	4.608e-07	4.544e-07	4.605e-07	4.736e-07	4.822e-07	4.888e-07	4.363e-07	4.544e-07		1.0868e-06	1.0805e-06	1.0947e-06	1.0915e-06	1.0886e-06	1.0998e-06	1.1059e-06	1.1024e-06	1.108e-06	1.1177e-06		8.545e-07	8.986e-07	9.024e-07	9.191e-07	8.844e-07	1.0396e-06	1.0392e-06	1.0665e-06	1.0744e-06	1.0722e-06			8.247e-07	8.267e-07	8.132e-07	8.136e-07	8.02e-07	8.264e-07	8.182e-07	8.241e-07	8.09e-07	8.103e-07		6.765e-07	7.236e-07	7.407e-07
-0.06285		4.364e-07	4.497e-07	4.561e-07	4.685e-07	4.807e-07	4.931e-07	4.92e-07	4.817e-07	4.497e-07	4.685e-07		1.091e-06	1.0868e-06	1.0981e-06	1.1019e-06	1.1018e-06	1.1078e-06	1.1083e-06	1.1164e-06	1.1165e-06	1.1206e-06		8.584e-07	9.064e-07	9.225e-07	9.375e-07	8.874e-07	1.0575e-06	1.0575e-06	1.0768e-06	1.0886e-06	1.0877e-06			8.262e-07	8.436e-07	8.188e-07	8.276e-07	8.11e-07	8.38e-07	8.394e-07	8.374e-07	8.156e-07	8.238e-07		6.933e-07	7.442e-07	7.57e-07
-0.05521		4.454e-07	4.666e-07	4.729e-07	4.786e-07	4.942e-07	4.946e-07	5.077e-07	5.018e-07	4.666e-07	4.786e-07		1.1001e-06	1.103e-06	1.1112e-06	1.1154e-06	1.1117e-06	1.1125e-06	1.1226e-06	1.129e-06	1.1316e-06	1.1322e-06		8.758e-07	9.31e-07	9.456e-07	9.567e-07	8.975e-07	1.0715e-06	1.0718e-06	1.0916e-06	1.1118e-06	1.1087e-06			8.43e-07	8.49e-07	8.379e-07	8.467e-07	8.233e-07	8.542e-07	8.499e-07	8.561e-07	8.34e-07	8.373e-07		7.164e-07	7.602e-07	7.769e-07
-0.04885		4.554e-07	4.662e-07	4.896e-07	4.792e-07	4.869e-07	4.993e-07	5.149e-07	5.173e-07	4.662e-07	4.792e-07		1.1167e-06	1.1096e-06	1.1292e-06	1.1235e-06	1.1211e-06	1.1315e-06	1.1385e-06	1.1371e-06	1.1397e-06	1.1467e-06		8.98e-07	9.527e-07	9.587e-07	9.772e-07	9.112e-07	1.0881e-06	1.0946e-06	1.1224e-06	1.1322e-06	1.1286e-06			8.591e-07	8.718e-07	8.504e-07	8.552e-07	8.296e-07	8.717e-07	8.619e-07	8.655e-07	8.452e-07	8.499e-07		7.392e-07	7.793e-07	7.96e-07
-0.04047		4.649e-07	4.705e-07	4.91e-07	4.963e-07	5.074e-07	5.162e-07	5.183e-07	5.185e-07	4.705e-07	4.963e-07		1.1266e-06	1.1214e-06	1.1388e-06	1.1393e-06	1.1372e-06	1.1439e-06	1.1481e-06	1.1558e-06	1.1516e-06	1.153e-06		9.051e-07	9.673e-07	9.834e-07	9.991e-07	9.177e-07	1.105e-06	1.1161e-06	1.1385e-06	1.1488e-06	1.1482e-06			8.611e-07	8.89e-07	8.625e-07	8.761e-07	8.406e-07	8.846e-07	8.868e-07	8.842e-07	8.594e-07	8.685e-07		7.615e-07	8.015e-07	8.184e-07
-0.03691		4.704e-07	4.905e-07	5.045e-07	5.094e-07	5.254e-07	5.233e-07	5.33e-07	5.297e-07	4.905e-07	5.094e-07		1.1361e-06	1.1368e-06	1.1545e-06	1.157e-06	1.1512e-06	1.1539e-06	1.166e-06	1.1729e-06	1.1664e-06	1.1644e-06		9.237e-07	9.916e-07	1.0056e-06	1.0214e-06	9.288e-07	1.1165e-06	1.132e-06	1.1677e-06	1.1823e-06	1.1722e-06			8.767e-07	9.034e-07	8.827e-07	8.948e-07	8.562e-07	9.032e-07	9.001e-07	9.03e-07	8.808e-07	8.853e-07		7.855e-07	8.175e-07	8.4e-07
-0.03053		4.783e-07	4.953e-07	5.198e-07	5.163e-07	5.196e-07	5.285e-07	5.468e-07	5.487e-07	4.953e-07	5.163e-07		1.1501e-06	1.1455e-06	1.1763e-06	1.1694e-06	1.1608e-06	1.1729e-06	1.1877e-06	1.187e-06	1.177e-06	1.1822e-06		9.482e-07	1.0136e-06	1.0268e-06	1.0461e-06	9.429e-07	1.1349e-06	1.1588e-06	1.1902e-06	1.2026e-06	1.1971e-06			8.968e-07	9.248e-07	9.009e-07	9.092e-07	8.645e-07	9.272e-07	9.214e-07	9.229e-07	8.911e-07	9.033e-07		8.103e-07	8.403e-07	8.564e-07
-0.02265		4.899e-07	4.949e-07	5.272e-07	5.251e-07	5.414e-07	5.409e-07	5.487e-07	5.58e-07	4.949e-07	5.251e-07		1.1624e-06	1.1594e-06	1.1886e-06	1.1901e-06	1.181e-06	1.184e-06	1.2031e-06	1.206e-06	1.1916e-06	1.19e-06		9.625e-07	1.0292e-06	1.0507e-06	1.0669e-06	9.51e-07	1.1516e-06	1.1814e-06	1.2036e-06	1.2257e-06	1.2194e-06			9.11e-07	9.437e-07	9.129e-07	9.283e-07	8.8e-07	9.434e-07	9.432e-07	9.432e-07	9.132e-07	9.272e-07		8.317e-07	8.627e-07	8.798e-07
-0.019047		4.884e-07	5.164e-07	5.335e-07	5.401e-07	5.567e-07	5.575e-07	5.722e-07	5.633e-07	5.164e-07	5.401e-07		1.1727e-06	1.1742e-06	1.2073e-06	1.2092e-06	1.1988e-06	1.2008e-06	1.2197e-06	1.2238e-06	1.2085e-06	1.203e-06		9.86e-07	1.0597e-06	1.0776e-06	1.0914e-06	9.639e-07	1.1608e-06	1.1994e-06	1.2413e-06	1.258e-06	1.2437e-06			9.277e-07	9.59e-07	9.395e-07	9.527e-07	8.991e-07	9.624e-07	9.62e-07	9.646e-07	9.354e-07	9.435e-07		8.523e-07	8.806e-07	9.013e-07
-0.012307		5.028e-07	5.224e-07	5.534e-07	5.551e-07	5.643e-07	5.629e-07	5.845e-07	5.9e-07	5.224e-07	5.551e-07		1.1938e-06	1.1877e-06	1.2348e-06	1.2283e-06	1.2141e-06	1.2256e-06	1.2483e-06	1.2464e-06	1.2226e-06	1.2258e-06		1.0123e-06	1.0866e-06	1.103e-06	1.1189e-06	9.884e-07	1.1804e-06	1.2345e-06	1.2707e-06	1.2804e-06	1.2777e-06			9.487e-07	9.848e-07	9.556e-07	9.727e-07	9.145e-07	9.899e-07	9.806e-07	9.872e-07	9.538e-07	9.642e-07		8.834e-07	9.041e-07	9.219e-07
-0.006337		5.128e-07	5.183e-07	5.631e-07	5.592e-07	5.748e-07	5.713e-07	5.864e-07	5.98e-07	5.183e-07	5.592e-07		1.2054e-06	1.2009e-06	1.2476e-06	1.2515e-06	1.2342e-06	1.2417e-06	1.2654e-06	1.2675e-06	1.2358e-06	1.2333e-06		1.0263e-06	1.1018e-06	1.1259e-06	1.1396e-06	9.954e-07	1.1967e-06	1.2512e-06	1.2961e-06	1.3066e-06	1.2985e-06			9.616e-07	1.0059e-06	9.756e-07	9.896e-07	9.325e-07	1.004e-06	1.0069e-06	1.006e-06	9.756e-07	9.888e-07		9.02e-07	9.266e-07	9.459e-07
-0.000674		5.083e-07	5.408e-07	5.664e-07	5.751e-07	5.97e-07	5.915e-07	6.075e-07	6.025e-07	5.408e-07	5.751e-07		1.2132e-06	1.2173e-06	1.2709e-06	1.2722e-06	1.2548e-06	1.2587e-06	1.2857e-06	1.2913e-06	1.2561e-06	1.2496e-06		1.0544e-06	1.1317e-06	1.1521e-06	1.1676e-06	1.0117e-06	1.2069e-06	1.2756e-06	1.3238e-06	1.3404e-06	1.3284e-06			9.79e-07	1.0237e-06	1.0008e-06	1.02e-06	9.529e-07	1.0283e-06	1.0328e-06	1.0319e-06	1.0009e-06	1.0163e-06		9.267e-07	9.461e-07	9.657e-07
0.005958		5.186e-07	5.508e-07	5.875e-07	5.917e-07	6.071e-07	5.981e-07	6.232e-07	6.286e-07	5.508e-07	5.917e-07		1.2342e-06	1.2293e-06	1.2964e-06	1.2889e-06	1.2694e-06	1.2817e-06	1.3138e-06	1.308e-06	1.2703e-06	1.2698e-06		1.0788e-06	1.1575e-06	1.174e-06	1.1947e-06	1.0366e-06	1.2179e-06	1.304e-06	1.3445e-06	1.3625e-06	1.3593e-06			1.0037e-06	1.047e-06	1.0207e-06	1.0386e-06	9.707e-07	1.0546e-06	1.0479e-06	1.0513e-06	1.0189e-06	1.0324e-06		9.525e-07	9.673e-07	9.814e-07
0.011074		5.293e-07	5.453e-07	5.99e-07	5.944e-07	6.138e-07	6.088e-07	6.376e-07	6.371e-07	5.453e-07	5.944e-07		1.2508e-06	1.2446e-06	1.3154e-06	1.3176e-06	1.2961e-06	1.305e-06	1.3339e-06	1.3326e-06	1.2886e-06	1.2818e-06		1.0956e-06	1.18e-06	1.1995e-06	1.2193e-06	1.0488e-06	1.2341e-06	1.3274e-06	1.3747e-06	1.3902e-06	1.3862e-06			1.0222e-06	1.0708e-06	1.0395e-06	1.0559e-06	9.891e-07	1.0735e-06	1.0783e-06	1.077e-06	1.0443e-06	1.0587e-06		9.667e-07	9.903e-07	1.009e-06
0.013788		5.32e-07	5.686e-07	6.013e-07	6.125e-07	6.34e-07	6.235e-07	6.509e-07	6.446e-07	5.686e-07	6.125e-07		1.2632e-06	1.265e-06	1.3393e-06	1.34e-06	1.3199e-06	1.3252e-06	1.3579e-06	1.3608e-06	1.3112e-06	1.3011e-06		1.125e-06	1.2083e-06	1.2264e-06	1.2495e-06	1.0728e-06	1.2455e-06	1.351e-06	1.4054e-06	1.4255e-06	1.4244e-06			1.0361e-06	1.0885e-06	1.0671e-06	1.0861e-06	1.0175e-06	1.0998e-06	1.101e-06	1.104e-06	1.0691e-06	1.0853e-06		9.933e-07	1.0068e-06	1.0289e-06
0.023779		5.362e-07	5.809e-07	6.242e-07	6.318e-07	6.504e-07	6.416e-07	6.614e-07	6.702e-07	5.809e-07	6.318e-07		1.2839e-06	1.2829e-06	1.3679e-06	1.361e-06	1.3365e-06	1.3532e-06	1.3881e-06	1.3829e-06	1.3298e-06	1.3254e-06		1.1493e-06	1.2335e-06	1.2528e-06	1.2792e-06	1.102e-06	1.2538e-06	1.3816e-06	1.4386e-06	1.4571e-06	1.4512e-06			1.0648e-06	1.1083e-06	1.0857e-06	1.1043e-06	1.0336e-06	1.1234e-06	1.1178e-06	1.125e-06	1.0944e-06	1.1059e-06		1.0213e-06	1.0276e-06	1.0486e-06
0.029699		5.475e-07	5.814e-07	6.387e-07	6.345e-07	6.555e-07	6.524e-07	6.874e-07	6.858e-07	5.814e-07	6.345e-07		1.3016e-06	1.3001e-06	1.389e-06	1.3884e-06	1.366e-06	1.3784e-06	1.41e-06	1.4099e-06	1.3515e-06	1.3426e-06		1.1736e-06	1.2581e-06	1.2799e-06	1.3021e-06	1.1152e-06	1.2707e-06	1.4098e-06	1.4622e-06	1.4858e-06	1.481e-06			1.0833e-06	1.1327e-06	1.106e-06	1.1248e-06	1.0546e-06	1.1448e-06	1.1503e-06	1.1499e-06	1.1152e-06	1.1338e-06		1.0369e-06	1.0538e-06	1.0718e-06
0.03454		5.552e-07	6.006e-07	6.464e-07	6.527e-07	6.785e-07	6.644e-07	6.926e-07	6.877e-07	6.006e-07	6.527e-07		1.3155e-06	1.3222e-06	1.4102e-06	1.412e-06	1.3892e-06	1.3955e-06	1.4317e-06	1.4387e-06	1.3772e-06	1.3612e-06		1.1994e-06	1.2836e-06	1.3091e-06	1.3353e-06	1.1423e-06	1.2784e-06	1.4318e-06	1.486e-06	1.5176e-06	1.52e-06			1.1032e-06	1.1528e-06	1.1352e-06	1.1563e-06	1.0844e-06	1.168e-06	1.1744e-06	1.1792e-06	1.147e-06	1.1608e-06		1.0568e-06	1.0693e-06	1.0856e-06
0.04158		5.536e-07	6.16e-07	6.657e-07	6.741e-07	6.911e-07	6.901e-07	7.113e-07	7.169e-07	6.16e-07	6.741e-07		1.3405e-06	1.3416e-06	1.4397e-06	1.4352e-06	1.4109e-06	1.4275e-06	1.4644e-06	1.4604e-06	1.3982e-06	1.3886e-06		1.227e-06	1.3123e-06	1.3322e-06	1.3605e-06	1.1762e-06	1.2899e-06	1.4646e-06	1.5282e-06	1.5492e-06	1.5514e-06			1.1297e-06	1.1768e-06	1.1552e-06	1.1766e-06	1.1047e-06	1.2016e-06	1.1919e-06	1.1992e-06	1.1693e-06	1.1825e-06		1.0808e-06	1.0892e-06	1.108e-06
0.04763		5.684e-07	6.266e-07	6.816e-07	6.82e-07	7.003e-07	6.922e-07	7.362e-07	7.379e-07	6.266e-07	6.82e-07		1.3659e-06	1.3678e-06	1.467e-06	1.4689e-06	1.4454e-06	1.4601e-06	1.4923e-06	1.4969e-06	1.4285e-06	1.415e-06		1.2616e-06	1.3439e-06	1.3698e-06	1.3905e-06	1.1995e-06	1.309e-06	1.4996e-06	1.56e-06	1.5922e-06	1.5868e-06			1.1525e-06	1.2057e-06	1.1813e-06	1.2043e-06	1.1315e-06	1.2251e-06	1.2286e-06	1.2285e-06	1.1992e-06	1.2136e-06		1.101e-06	1.1165e-06	1.135e-06
0.05607		5.798e-07	6.402e-07	6.991e-07	6.991e-07	7.256e-07	7.116e-07	7.373e-07	7.457e-07	6.402e-07	6.991e-07		1.3802e-06	1.3944e-06	1.4879e-06	1.4902e-06	1.4697e-06	1.4781e-06	1.5155e-06	1.5227e-06	1.4546e-06	1.4347e-06		1.2832e-06	1.3702e-06	1.3998e-06	1.4245e-06	1.2323e-06	1.3089e-06	1.523e-06	1.59e-06	1.6208e-06	1.6265e-06			1.1698e-06	1.2207e-06	1.209e-06	1.2275e-06	1.1632e-06	1.2469e-06	1.2523e-06	1.2586e-06	1.2328e-06	1.2449e-06		1.12e-06	1.1278e-06	1.1508e-06
0.05906		5.751e-07	6.577e-07	7.081e-07	7.213e-07	7.434e-07	7.402e-07	7.596e-07	7.657e-07	6.577e-07	7.213e-07		1.4048e-06	1.4098e-06	1.5174e-06	1.5141e-06	1.4926e-06	1.5081e-06	1.5471e-06	1.5444e-06	1.4772e-06	1.4643e-06		1.3092e-06	1.4008e-06	1.4238e-06	1.4528e-06	1.264e-06	1.3238e-06	1.5606e-06	1.6243e-06	1.6547e-06	1.6574e-06			1.1983e-06	1.2483e-06	1.2346e-06	1.2526e-06	1.1755e-06	1.2779e-06	1.2726e-06	1.2795e-06	1.2502e-06	1.2643e-06		1.147e-06	1.1467e-06	1.164e-06
0.06661		5.897e-07	6.708e-07	7.263e-07	7.361e-07	7.592e-07	7.407e-07	7.865e-07	7.907e-07	6.708e-07	7.361e-07		1.4303e-06	1.435e-06	1.54e-06	1.5448e-06	1.5226e-06	1.5355e-06	1.5709e-06	1.5759e-06	1.5037e-06	1.4893e-06		1.3379e-06	1.4271e-06	1.4617e-06	1.484e-06	1.2961e-06	1.341e-06	1.5916e-06	1.6499e-06	1.6922e-06	1.6962e-06			1.2191e-06	1.2725e-06	1.2531e-06	1.2766e-06	1.21e-06	1.2984e-06	1.3043e-06	1.308e-06	1.2787e-06	1.2978e-06		1.1558e-06	1.1701e-06	1.1844e-06
0.0731		6.038e-07	6.814e-07	7.497e-07	7.458e-07	7.757e-07	7.663e-07	7.944e-07	8.064e-07	6.814e-07	7.458e-07		1.4485e-06	1.4654e-06	1.562e-06	1.5716e-06	1.5503e-06	1.5578e-06	1.598e-06	1.6024e-06	1.5368e-06	1.5123e-06		1.3683e-06	1.4591e-06	1.492e-06	1.5199e-06	1.3277e-06	1.3427e-06	1.6198e-06	1.6955e-06	1.733e-06	1.7396e-06			1.2421e-06	1.2896e-06	1.2842e-06	1.3052e-06	1.2409e-06	1.3245e-06	1.3312e-06	1.342e-06	1.3132e-06	1.3262e-06		1.1727e-06	1.1789e-06	1.2071e-06
0.07776		6.003e-07	7.023e-07	7.56e-07	7.762e-07	7.988e-07	7.901e-07	8.18e-07	8.267e-07	7.023e-07	7.762e-07		1.4774e-06	1.4838e-06	1.595e-06	1.5941e-06	1.577e-06	1.5914e-06	1.6313e-06	1.6289e-06	1.56e-06	1.5474e-06		1.405e-06	1.4931e-06	1.5242e-06	1.554e-06	1.3635e-06	1.3584e-06	1.6553e-06	1.7349e-06	1.7715e-06	1.7772e-06			1.2665e-06	1.3214e-06	1.3102e-06	1.3307e-06	1.2594e-06	1.3592e-06	1.358e-06	1.3643e-06	1.3331e-06	1.3536e-06		1.1982e-06	1.1956e-06	1.2193e-06
0.08378		6.198e-07	7.205e-07	7.788e-07	7.948e-07	8.197e-07	8.075e-07	8.438e-07	8.466e-07	7.205e-07	7.948e-07		1.5e-06	1.5098e-06	1.6177e-06	1.6244e-06	1.6035e-06	1.621e-06	1.6543e-06	1.6602e-06	1.5869e-06	1.5713e-06		1.4338e-06	1.524e-06	1.5642e-06	1.5864e-06	1.4064e-06	1.3733e-06	1.6939e-06	1.7729e-06	1.8148e-06	1.8195e-06			1.2896e-06	1.3467e-06	1.3276e-06	1.353e-06	1.2921e-06	1.3769e-06	1.3857e-06	1.3921e-06	1.3664e-06	1.3864e-06		1.2089e-06	1.2205e-06	1.2384e-06
0.08932		6.401e-07	7.32e-07	8.047e-07	8.035e-07	8.325e-07	8.269e-07	8.596e-07	8.683e-07	7.32e-07	8.035e-07		1.5197e-06	1.5416e-06	1.6403e-06	1.651e-06	1.6324e-06	1.6428e-06	1.6832e-06	1.6873e-06	1.6211e-06	1.5997e-06		1.4696e-06	1.5609e-06	1.5951e-06	1.6296e-06	1.4419e-06	1.3807e-06	1.7268e-06	1.816e-06	1.8587e-06	1.8674e-06			1.3155e-06	1.3676e-06	1.3595e-06	1.3855e-06	1.3273e-06	1.4117e-06	1.4191e-06	1.4297e-06	1.3979e-06	1.4201e-06		1.2261e-06	1.2285e-06	1.2568e-06
0.09509		6.343e-07	7.558e-07	8.128e-07	8.338e-07	8.561e-07	8.514e-07	8.764e-07	8.882e-07	7.558e-07	8.338e-07		1.551e-06	1.5619e-06	1.6731e-06	1.6748e-06	1.6591e-06	1.6755e-06	1.7136e-06	1.7138e-06	1.6462e-06	1.636e-06		1.5067e-06	1.5976e-06	1.6341e-06	1.6674e-06	1.4878e-06	1.3965e-06	1.7701e-06	1.8552e-06	1.8978e-06	1.9144e-06			1.3392e-06	1.3983e-06	1.3921e-06	1.4126e-06	1.3537e-06	1.448e-06	1.4457e-06	1.4533e-06	1.4233e-06	1.4472e-06		1.247e-06	1.2475e-06	1.265e-06
0.10219		6.601e-07	7.801e-07	8.443e-07	8.58e-07	8.855e-07	8.816e-07	9.132e-07	9.137e-07	7.801e-07	8.58e-07		1.5812e-06	1.595e-06	1.7011e-06	1.7118e-06	1.694e-06	1.712e-06	1.7439e-06	1.7503e-06	1.6829e-06	1.6661e-06		1.548e-06	1.6408e-06	1.6851e-06	1.709e-06	1.5364e-06	1.4228e-06	1.8196e-06	1.9064e-06	1.9544e-06	1.9666e-06			1.3692e-06	1.4237e-06	1.4182e-06	1.449e-06	1.3867e-06	1.4744e-06	1.4824e-06	1.4913e-06	1.4642e-06	1.4859e-06		1.2582e-06	1.2712e-06	1.2902e-06
0.10709		6.846e-07	7.912e-07	8.694e-07	8.667e-07	8.971e-07	8.891e-07	9.358e-07	9.45e-07	7.912e-07	8.667e-07		1.6033e-06	1.6257e-06	1.7267e-06	1.7378e-06	1.7214e-06	1.7362e-06	1.7724e-06	1.7768e-06	1.7152e-06	1.6966e-06		1.5868e-06	1.6793e-06	1.72e-06	1.7549e-06	1.5656e-06	1.4317e-06	1.8526e-06	1.9546e-06	2.0001e-06	2.0187e-06			1.394e-06	1.4515e-06	1.4504e-06	1.4785e-06	1.4203e-06	1.5056e-06	1.5121e-06	1.5272e-06	1.4998e-06	1.5196e-06		1.2744e-06	1.2768e-06	1.3054e-06
0.10975		6.872e-07	8.155e-07	8.782e-07	9.029e-07	9.27e-07	9.242e-07	9.521e-07	9.59e-07	8.155e-07	9.029e-07		1.6339e-06	1.6463e-06	1.7577e-06	1.7618e-06	1.7476e-06	1.7683e-06	1.8047e-06	1.8074e-06	1.7413e-06	1.7334e-06		1.6257e-06	1.7235e-06	1.7624e-06	1.7976e-06	1.627e-06	1.4553e-06	1.9032e-06	2.0043e-06	2.0507e-06	2.0702e-06			1.4236e-06	1.4834e-06	1.4819e-06	1.508e-06	1.4523e-06	1.5429e-06	1.541e-06	1.5579e-06	1.5338e-06	1.5493e-06		1.294e-06	1.2951e-06	1.3152e-06
0.11963		7.117e-07	8.438e-07	9.093e-07	9.299e-07	9.58e-07	9.56e-07	9.898e-07	9.891e-07	8.438e-07	9.299e-07		1.6595e-06	1.6783e-06	1.7852e-06	1.7953e-06	1.7816e-06	1.8017e-06	1.8337e-06	1.8435e-06	1.776e-06	1.7624e-06		1.6665e-06	1.7636e-06	1.8123e-06	1.8431e-06	1.6745e-06	1.4856e-06	1.954e-06	2.0516e-06	2.1064e-06	2.1244e-06			1.4516e-06	1.5137e-06	1.5085e-06	1.5432e-06	1.4847e-06	1.5734e-06	1.5828e-06	1.5931e-06	1.5633e-06	1.5912e-06		1.3041e-06	1.3189e-06	1.3369e-06
0.12586		7.396e-07	8.66e-07	9.392e-07	9.392e-07	9.735e-07	9.636e-07	1.0154e-06	1.0203e-06	8.66e-07	9.392e-07		1.689e-06	1.7144e-06	1.8155e-06	1.8255e-06	1.8142e-06	1.8297e-06	1.8661e-06	1.8741e-06	1.8141e-06	1.7992e-06		1.7196e-06	1.8197e-06	1.8601e-06	1.8979e-06	1.7281e-06	1.5061e-06	2.0008e-06	2.1105e-06	2.1679e-06	2.1858e-06			1.4864e-06	1.5439e-06	1.547e-06	1.5787e-06	1.5306e-06	1.6132e-06	1.6174e-06	1.6356e-06	1.6101e-06	1.6351e-06		1.321e-06	1.3318e-06	1.3563e-06
0.1317		7.525e-07	8.889e-07	9.616e-07	9.776e-07	1.0008e-06	1.0064e-06	1.0303e-06	1.0394e-06	8.889e-07	9.776e-07		1.7179e-06	1.735e-06	1.8458e-06	1.8511e-06	1.8424e-06	1.8628e-06	1.8963e-06	1.9009e-06	1.8438e-06	1.8348e-06		1.7612e-06	1.8598e-06	1.9054e-06	1.9459e-06	1.7806e-06	1.5359e-06	2.0578e-06	2.1657e-06	2.2192e-06	2.2447e-06			1.5146e-06	1.578e-06	1.5851e-06	1.6142e-06	1.562e-06	1.652e-06	1.6526e-06	1.6713e-06	1.648e-06	1.6677e-06		1.3358e-06	1.3468e-06	1.3665e-06
0.1377		7.721e-07	9.22e-07	9.856e-07	1.0115e-06	1.0421e-06	1.0409e-06	1.0719e-06	1.076e-06	9.22e-07	1.0115e-06		1.7502e-06	1.7713e-06	1.8778e-06	1.8906e-06	1.8817e-06	1.9023e-06	1.9333e-06	1.9432e-06	1.88e-06	1.869e-06		1.8145e-06	1.9035e-06	1.9616e-06	1.9949e-06	1.8298e-06	1.5765e-06	2.1157e-06	2.2235e-06	2.283e-06	2.3049e-06			1.5514e-06	1.62e-06	1.6161e-06	1.6564e-06	1.6047e-06	1.6904e-06	1.6953e-06	1.7109e-06	1.686e-06	1.7118e-06		1.3496e-06	1.3692e-06	1.3938e-06
0.14346		8.085e-07	9.465e-07	1.0203e-06	1.0252e-06	1.0602e-06	1.0539e-06	1.0995e-06	1.1094e-06	9.465e-07	1.0252e-06		1.7825e-06	1.8109e-06	1.9136e-06	1.9252e-06	1.9168e-06	1.9374e-06	1.9704e-06	1.9812e-06	1.923e-06	1.9106e-06		1.8733e-06	1.9699e-06	2.0201e-06	2.056e-06	1.8944e-06	1.6137e-06	2.1763e-06	2.2921e-06	2.356e-06	2.373e-06			1.5893e-06	1.6533e-06	1.664e-06	1.6977e-06	1.6524e-06	1.7316e-06	1.7403e-06	1.7605e-06	1.7379e-06	1.7634e-06		1.3648e-06	1.3871e-06	1.4171e-06
0.15235		8.314e-07	9.717e-07	1.0513e-06	1.0636e-06	1.0936e-06	1.0993e-06	1.1205e-06	1.1396e-06	9.717e-07	1.0636e-06		1.8168e-06	1.8437e-06	1.9512e-06	1.9568e-06	1.9525e-06	1.9805e-06	2.0099e-06	2.0174e-06	1.9624e-06	1.9545e-06		1.921e-06	2.0229e-06	2.0701e-06	2.1174e-06	1.9578e-06	1.6523e-06	2.2405e-06	2.3566e-06	2.413e-06	2.4408e-06			1.6314e-06	1.7025e-06	1.7067e-06	1.7385e-06	1.6943e-06	1.7849e-06	1.7869e-06	1.8082e-06	1.7838e-06	1.8085e-06		1.3885e-06	1.4109e-06	1.4348e-06
0.15539		8.503e-07	1.0078e-06	1.0706e-06	1.0982e-06	1.1282e-06	1.1323e-06	1.1665e-06	1.1746e-06	1.0078e-06	1.0982e-06		1.8521e-06	1.8789e-06	1.9844e-06	1.9995e-06	1.996e-06	2.0154e-06	2.0485e-06	2.0605e-06	2.0018e-06	1.9921e-06		1.9778e-06	2.0778e-06	2.1327e-06	2.1696e-06	2.0193e-06	1.7076e-06	2.3033e-06	2.4146e-06	2.4803e-06	2.5026e-06			1.6728e-06	1.7446e-06	1.7486e-06	1.7869e-06	1.7412e-06	1.8277e-06	1.8347e-06	1.8536e-06	1.831e-06	1.86e-06		1.4014e-06	1.4391e-06	1.4612e-06
0.162		8.901e-07	1.0451e-06	1.1167e-06	1.1297e-06	1.1636e-06	1.1592e-06	1.205e-06	1.2142e-06	1.0451e-06	1.1297e-06		1.8914e-06	1.9264e-06	2.0259e-06	2.0431e-06	2.0398e-06	2.0584e-06	2.093e-06	2.1066e-06	2.0536e-06	2.0401e-06		2.0465e-06	2.1478e-06	2.1999e-06	2.2365e-06	2.091e-06	1.7561e-06	2.3796e-06	2.4961e-06	2.5614e-06	2.5834e-06			1.7231e-06	1.7861e-06	1.8037e-06	1.8424e-06	1.8024e-06	1.8824e-06	1.892e-06	1.9136e-06	1.894e-06	1.9177e-06		1.4194e-06	1.4632e-06	1.4946e-06
0.1683		9.158e-07	1.0621e-06	1.1469e-06	1.1583e-06	1.1874e-06	1.1952e-06	1.2252e-06	1.2511e-06	1.0621e-06	1.1583e-06		1.9301e-06	1.9608e-06	2.0655e-06	2.0808e-06	2.0772e-06	2.1068e-06	2.1384e-06	2.1444e-06	2.0947e-06	2.0879e-06		2.0979e-06	2.1903e-06	2.2466e-06	2.2943e-06	2.144e-06	1.8047e-06	2.444e-06	2.5646e-06	2.6226e-06	2.652e-06			1.7684e-06	1.8389e-06	1.8521e-06	1.8896e-06	1.8476e-06	1.9387e-06	1.9395e-06	1.9626e-06	1.9412e-06	1.9648e-06		1.4472e-06	1.4842e-06	1.5182e-06
0.17345		9.297e-07	1.0975e-06	1.1665e-06	1.1982e-06	1.23e-06	1.2358e-06	1.2681e-06	1.279e-06	1.0975e-06	1.1982e-06		1.9708e-06	2.0016e-06	2.1054e-06	2.1256e-06	2.1256e-06	2.1568e-06	2.1773e-06	2.1922e-06	2.1362e-06	2.1291e-06		2.1539e-06	2.257e-06	2.3138e-06	2.3478e-06	2.2156e-06	1.8673e-06	2.5121e-06	2.6289e-06	2.6911e-06	2.7157e-06			1.8136e-06	1.8904e-06	1.8993e-06	1.9416e-06	1.9009e-06	1.987e-06	1.9944e-06	2.0118e-06	1.9945e-06	2.0248e-06		1.4625e-06	1.5222e-06	1.551e-06
0.18003		9.763e-07	1.1385e-06	1.209e-06	1.2268e-06	1.2657e-06	1.2694e-06	1.307e-06	1.315e-06	1.1385e-06	1.2268e-06		2.0084e-06	2.0478e-06	2.1473e-06	2.1678e-06	2.1665e-06	2.1953e-06	2.2226e-06	2.2378e-06	2.1878e-06	2.1774e-06		2.2184e-06	2.3186e-06	2.3752e-06	2.413e-06	2.2834e-06	1.9231e-06	2.5846e-06	2.7007e-06	2.777e-06	2.782e-06			1.8648e-06	1.9333e-06	1.9537e-06	1.9971e-06	1.9611e-06	2.0392e-06	2.0454e-06	2.0734e-06	2.0522e-06	2.0813e-06		1.4854e-06	1.5486e-06	1.585e-06
0.18557		1.0049e-06	1.1558e-06	1.2422e-06	1.2533e-06	1.2825e-06	1.299e-06	1.3355e-06	1.3576e-06	1.1558e-06	1.2533e-06		2.0541e-06	2.0882e-06	2.1934e-06	2.2118e-06	2.2113e-06	2.2446e-06	2.2738e-06	2.2788e-06	2.2348e-06	2.229e-06		2.2735e-06	2.3762e-06	2.4238e-06	2.4759e-06	2.3488e-06	1.9867e-06	2.6529e-06	2.809e-06	2.782e-06	2.846e-06			1.9228e-06	1.9916e-06	2.0104e-06	2.0476e-06	2.0104e-06	2.1019e-06	2.0978e-06	2.1267e-06	2.1084e-06	2.1336e-06		1.5158e-06	1.5805e-06	1.6155e-06
0.18996		1.022e-06	1.1908e-06	1.2573e-06	1.2931e-06	1.3265e-06	1.3404e-06	1.3694e-06	1.3762e-06	1.1908e-06	1.2931e-06		2.0986e-06	2.1316e-06	2.2366e-06	2.26e-06	2.262e-06	2.2956e-06	2.3156e-06	2.3302e-06	2.2805e-06	2.2754e-06		2.3321e-06	2.4339e-06	2.4896e-06	2.527e-06	2.4176e-06	2.0581e-06	2.7256e-06	2.783e-06	2.855e-06	2.872e-06			1.9693e-06	2.0437e-06	2.0597e-06	2.1041e-06	2.0696e-06	2.1532e-06	2.1609e-06	2.18e-06	2.1638e-06	2.195e-06		1.5331e-06	1.6222e-06	1.657e-06
0.19821		1.0655e-06	1.2291e-06	1.2987e-06	1.3191e-06	1.3601e-06	1.3668e-06	1.4063e-06	1.4186e-06	1.2291e-06	1.3191e-06		2.1401e-06	2.1843e-06	2.281e-06	2.3054e-06	2.3059e-06	2.339e-06	2.3634e-06	2.3793e-06	2.3355e-06	2.3263e-06		2.3952e-06	2.4864e-06	2.55e-06	2.5858e-06	2.4746e-06	2.1251e-06	2.773e-06	2.896e-06	2.972e-06	2.976e-06			2.0216e-06	2.0932e-06	2.1151e-06	2.1616e-06	2.127e-06	2.2062e-06	2.2116e-06	2.2371e-06	2.221e-06	2.2525e-06		1.5641e-06	1.6511e-06	1.6986e-06
0.20366		1.0929e-06	1.2384e-06	1.3314e-06	1.3411e-06	1.375e-06	1.3913e-06	1.4315e-06	1.4511e-06	1.2384e-06	1.3411e-06		2.19e-06	2.2266e-06	2.3324e-06	2.3509e-06	2.3512e-06	2.3898e-06	2.4158e-06	2.4227e-06	2.3832e-06	2.3816e-06		2.4543e-06	2.5475e-06	2.595e-06	2.6399e-06	2.55e-06	2.1922e-06	2.865e-06	2.999e-06	3.012e-06	3.058e-06			2.0761e-06	2.148e-06	2.1683e-06	2.208e-06	2.1805e-06	2.2653e-06	2.2642e-06	2.2905e-06	2.2756e-06	2.3048e-06		1.5967e-06	1.6942e-06	1.7353e-06
0.20614		1.1176e-06	1.2774e-06	1.3418e-06	1.38e-06	1.4163e-06	1.4333e-06	1.459e-06	1.4664e-06	1.2774e-06	1.38e-06		2.2328e-06	2.2713e-06	2.3742e-06	2.3992e-06	2.4019e-06	2.4384e-06	2.4588e-06	2.4751e-06	2.4298e-06	2.4244e-06		2.5034e-06	2.5951e-06	2.6496e-06	2.6972e-06	2.6138e-06	2.2751e-06	3.028e-06	3.052e-06	3.094e-06	3.109e-06			2.1192e-06	2.1988e-06	2.2152e-06	2.2568e-06	2.2332e-06	2.3096e-06	2.3197e-06	2.338e-06	2.3276e-06	2.3606e-06		1.6236e-06	1.74e-06	1.78e-06
0.21588		1.1515e-06	1.3148e-06	1.3808e-06	1.4018e-06	1.4404e-06	1.45e-06	1.4937e-06	1.5039e-06	1.3148e-06	1.4018e-06		2.2766e-06	2.3228e-06	2.4184e-06	2.4436e-06	2.4444e-06	2.4776e-06	2.5056e-06	2.5222e-06	2.4824e-06	2.4742e-06		2.5652e-06	2.6553e-06	2.7052e-06	2.754e-06	2.6858e-06	2.3496e-06	3.192e-06	3.232e-06	3.248e-06	3.213e-06			2.171e-06	2.2393e-06	2.2641e-06	2.3097e-06	2.2876e-06	2.3611e-06	2.3636e-06	2.3906e-06	2.3805e-06	2.4088e-06		1.6578e-06	1.7777e-06	1.827e-06
0.2219		1.1826e-06	1.3344e-06	1.4126e-06	1.4192e-06	1.4543e-06	1.4767e-06	1.5199e-06	1.5375e-06	1.3344e-06	1.4192e-06		2.3313e-06	2.3672e-06	2.4728e-06	2.491e-06	2.4942e-06	2.5342e-06	2.5576e-06	2.5674e-06	2.5295e-06	2.5314e-06		2.63e-06	2.7182e-06	2.714e-06	2.814e-06	2.77e-06	2.4431e-06	3.38e-06	3.331e-06	3.312e-06	3.298e-06			2.2214e-06	2.2915e-06	2.316e-06	2.3534e-06	2.3322e-06	2.4099e-06	2.4149e-06	2.4402e-06	2.4312e-06	2.4568e-06		1.6968e-06	1.8268e-06	1.8748e-06
0.22909		1.2122e-06	1.3611e-06	1.4267e-06	1.4542e-06	1.4892e-06	1.5049e-06	1.5396e-06	1.5502e-06	1.3611e-06	1.4542e-06		2.3688e-06	2.4084e-06	2.5089e-06	2.5326e-06	2.5455e-06	2.5736e-06	2.5931e-06	2.6127e-06	2.5702e-06	2.5675e-06		2.678e-06	2.71e-06	2.805e-06	2.837e-06	2.8e-06	2.5378e-06	3.333e-06	3.275e-06	3.306e-06	3.325e-06			2.2533e-06	2.3311e-06	2.3478e-06	2.3941e-06	2.372e-06	2.4433e-06	2.4568e-06	2.4792e-06	2.4672e-06	2.4954e-06		1.7265e-06	1.8706e-06	1.9199e-06
0.23359		1.2396e-06	1.3901e-06	1.451e-06	1.4781e-06	1.519e-06	1.5262e-06	1.5644e-06	1.5766e-06	1.3901e-06	1.4781e-06		2.4062e-06	2.4532e-06	2.5464e-06	2.5708e-06	2.5829e-06	2.6054e-06	2.6328e-06	2.651e-06	2.6137e-06	2.6072e-06		2.756e-06	2.818e-06	2.857e-06	2.885e-06	2.873e-06	2.6353e-06	3.238e-06	3.332e-06	3.383e-06	3.372e-06			2.2898e-06	2.3564e-06	2.388e-06	2.4289e-06	2.4129e-06	2.4769e-06	2.4853e-06	2.5088e-06	2.5076e-06	2.5283e-06		1.763e-06	1.9123e-06	1.9682e-06
0.23963		1.2654e-06	1.4148e-06	1.476e-06	1.4942e-06	1.5227e-06	1.545e-06	1.5876e-06	1.6067e-06	1.4148e-06	1.4942e-06		2.4491e-06	2.486e-06	2.5867e-06	2.6042e-06	2.6178e-06	2.6467e-06	2.6728e-06	2.6856e-06	2.6484e-06	2.6523e-06		2.835e-06	2.879e-06	2.885e-06	2.965e-06	2.992e-06	2.7496e-06	3.339e-06	3.385e-06	3.416e-06	3.452e-06			2.3272e-06	2.3928e-06	2.4188e-06	2.4552e-06	2.4398e-06	2.5098e-06	2.5176e-06	2.54e-06	2.5336e-06	2.5549e-06		1.8029e-06	1.9595e-06	2.0093e-06
0.24834		1.2981e-06	1.4284e-06	1.4964e-06	1.5176e-06	1.5482e-06	1.5695e-06	1.5978e-06	1.6236e-06	1.4284e-06	1.5176e-06		2.481e-06	2.5224e-06	2.6142e-06	2.6398e-06	2.6539e-06	2.6786e-06	2.7e-06	2.748e-06	2.683e-06	2.6808e-06		2.82e-06	2.88e-06	2.963e-06	3.005e-06	3.047e-06	2.87e-06	3.382e-06	3.396e-06	3.459e-06	3.486e-06			2.3528e-06	2.4225e-06	2.4415e-06	2.4813e-06	2.4725e-06	2.5323e-06	2.547e-06	2.5668e-06	2.5646e-06	2.5883e-06		1.8373e-06	2.0091e-06	2.0595e-06
0.25142		1.3184e-06	1.4602e-06	1.5122e-06	1.5354e-06	1.5761e-06	1.5922e-06	1.6243e-06	1.6374e-06	1.4602e-06	1.5354e-06		2.5114e-06	2.5567e-06	2.6432e-06	2.6689e-06	2.6834e-06	2.707e-06	2.731e-06	2.775e-06	2.756e-06	2.726e-06		2.927e-06	2.988e-06	3.036e-06	3.06e-06	3.134e-06	2.928e-06	3.434e-06	3.515e-06	3.581e-06	3.579e-06			2.3786e-06	2.4389e-06	2.4693e-06	2.5081e-06	2.4984e-06	2.5576e-06	2.5681e-06	2.5903e-06	2.5897e-06	2.6126e-06		1.8721e-06	2.0459e-06	2.1067e-06
0.25806		1.346e-06	1.482e-06	1.5359e-06	1.56e-06	1.5901e-06	1.6074e-06	1.6463e-06	1.6682e-06	1.482e-06	1.56e-06		2.5427e-06	2.5795e-06	2.6722e-06	2.685e-06	2.703e-06	2.753e-06	2.799e-06	2.773e-06	2.741e-06	2.788e-06		3.022e-06	3.065e-06	3.105e-06	3.148e-06	3.299e-06	3.072e-06	3.588e-06	3.614e-06	3.643e-06	3.676e-06			2.4005e-06	2.4622e-06	2.4899e-06	2.524e-06	2.5164e-06	2.5779e-06	2.5826e-06	2.612e-06	2.6072e-06	2.6298e-06		1.914e-06	2.0853e-06	2.1448e-06
0.26444		1.3748e-06	1.4927e-06	1.556e-06	1.5782e-06	1.6123e-06	1.6314e-06	1.6607e-06	1.6844e-06	1.4927e-06	1.5782e-06		2.5632e-06	2.6052e-06	2.684e-06	2.75e-06	2.754e-06	2.757e-06	2.778e-06	2.802e-06	2.771e-06	2.754e-06		3.036e-06	3.09e-06	3.166e-06	3.195e-06	3.339e-06	3.201e-06	3.662e-06	3.687e-06	3.71e-06	3.747e-06			2.42e-06	2.4824e-06	2.5032e-06	2.5368e-06	2.5406e-06	2.5884e-06	2.6067e-06	2.6282e-06	2.6304e-06	2.6562e-06		1.9471e-06	2.1312e-06	2.1912e-06
0.26936		1.3953e-06	1.5291e-06	1.5717e-06	1.6012e-06	1.6412e-06	1.66e-06	1.6882e-06	1.6979e-06	1.5291e-06	1.6012e-06		2.5807e-06	2.6266e-06	2.706e-06	2.756e-06	2.784e-06	2.754e-06	2.784e-06	2.833e-06	2.809e-06	2.775e-06		3.177e-06	3.221e-06	3.27e-06	3.272e-06	3.467e-06	3.306e-06	3.746e-06	3.812e-06	3.875e-06	3.865e-06			2.4377e-06	2.4962e-06	2.5265e-06	2.5651e-06	2.5627e-06	2.6152e-06	2.6238e-06	2.6476e-06	2.6467e-06	2.6728e-06		1.9837e-06	2.1693e-06	2.231e-06
0.2766		1.4306e-06	1.5585e-06	1.6043e-06	1.6328e-06	1.6568e-06	1.6818e-06	1.7163e-06	1.7359e-06	1.5585e-06	1.6328e-06		2.605e-06	2.6398e-06	2.768e-06	2.735e-06	2.745e-06	2.799e-06	2.84e-06	2.805e-06	2.784e-06	2.836e-06		3.283e-06	3.325e-06	3.346e-06	3.387e-06	3.658e-06	3.473e-06	3.944e-06	3.944e-06	3.963e-06	4.006e-06			2.4656e-06	2.5224e-06	2.5536e-06	2.5839e-06	2.5832e-06	2.6376e-06	2.6385e-06	2.6721e-06	2.6681e-06	2.659e-06		2.0256e-06	2.2112e-06	2.2676e-06
0.2826		1.4632e-06	1.5729e-06	1.6312e-06	1.6491e-06	1.683e-06	1.7115e-06	1.7384e-06	1.7567e-06	1.5729e-06	1.6491e-06		2.6133e-06	2.6528e-06	2.72e-06	2.786e-06	2.786e-06	2.802e-06	2.822e-06	2.828e-06	2.794e-06	2.789e-06		3.326e-06	3.378e-06	3.432e-06	3.454e-06	3.712e-06	3.648e-06	4.046e-06	4.071e-06	4.068e-06	4.104e-06			2.4805e-06	2.5343e-06	2.5605e-06	2.5947e-06	2.6024e-06	2.6514e-06	2.6607e-06	2.67e-06	2.677e-06	2.721e-06		2.0491e-06	2.2477e-06	2.3073e-06
0.2856		1.496e-06	1.6198e-06	1.6507e-06	1.6811e-06	1.7171e-06	1.739e-06	1.7634e-06	1.7769e-06	1.6198e-06	1.6811e-06		2.6194e-06	2.663e-06	2.736e-06	2.775e-06	2.803e-06	2.767e-06	2.798e-06	2.854e-06	2.824e-06	2.799e-06		3.483e-06	3.513e-06	3.561e-06	3.588e-06	3.874e-06	3.795e-06	4.174e-06	4.217e-06	4.279e-06	4.284e-06			2.4997e-06	2.553e-06	2.5862e-06	2.6204e-06	2.6296e-06	2.6741e-06	2.6816e-06	2.714e-06	2.712e-06	2.743e-06		2.0842e-06	2.2739e-06	2.34e-06
0.2946		1.5336e-06	1.6467e-06	1.6928e-06	1.719e-06	1.7474e-06	1.7745e-06	1.7961e-06	1.816e-06	1.6467e-06	1.719e-06		2.6298e-06	2.67e-06	2.784e-06	2.74e-06	2.748e-06	2.81e-06	2.847e-06	2.814e-06	2.798e-06	2.847e-06		3.616e-06	3.645e-06	3.647e-06	3.72e-06	4.093e-06	3.991e-06	4.399e-06	4.377e-06	4.388e-06	4.428e-06			2.5264e-06	2.5736e-06	2.6061e-06	2.6432e-06	2.6479e-06	2.71e-06	2.669e-06	2.707e-06	2.711e-06	2.712e-06		2.1219e-06	2.3096e-06	2.3694e-06
0.3005		1.5811e-06	1.6747e-06	1.7314e-06	1.7443e-06	1.7752e-06	1.8016e-06	1.8382e-06	1.8516e-06	1.6747e-06	1.7443e-06		2.6336e-06	2.672e-06	2.746e-06	2.777e-06	2.792e-06	2.832e-06	2.809e-06	2.825e-06	2.795e-06	2.815e-06		3.718e-06	3.761e-06	3.795e-06	3.816e-06	4.217e-06	4.238e-06	4.549e-06	4.55e-06	4.572e-06	4.59e-06			2.5548e-06	2.6048e-06	2.628e-06	2.6665e-06	2.6776e-06	2.696e-06	2.74e-06	2.739e-06	2.727e-06	2.787e-06		2.1453e-06	2.3458e-06	2.4015e-06
0.3034		1.6242e-06	1.7273e-06	1.7633e-06	1.7845e-06	1.8172e-06	1.834e-06	1.8665e-06	1.8762e-06	1.7273e-06	1.7845e-06		2.6336e-06	2.688e-06	2.734e-06	2.772e-06	2.803e-06	2.768e-06	2.793e-06	2.847e-06	2.824e-06	2.8e-06		3.894e-06	3.9e-06	3.951e-06	4.02e-06	4.427e-06	4.427e-06	4.74e-06	4.749e-06	4.815e-06	4.852e-06			2.5858e-06	2.6345e-06	2.6671e-06	2.734e-06	2.763e-06	2.74e-06	2.777e-06	2.817e-06	2.821e-06	2.834e-06		2.1761e-06	2.3698e-06	2.43e-06
0.3124		1.6587e-06	1.771e-06	1.8083e-06	1.8294e-06	1.859e-06	1.8901e-06	1.9073e-06	1.9263e-06	1.771e-06	1.8294e-06		2.639e-06	2.676e-06	2.776e-06	2.745e-06	2.738e-06	2.808e-06	2.842e-06	2.805e-06	2.793e-06	2.85e-06		4.061e-06	4.088e-06	4.095e-06	4.165e-06	4.699e-06	4.698e-06	5.021e-06	4.977e-06	4.988e-06	5.033e-06			2.6264e-06	2.668e-06	2.696e-06	2.73e-06	2.741e-06	2.831e-06	2.738e-06	2.798e-06	2.793e-06	2.817e-06		2.2096e-06	2.3993e-06	2.456e-06
0.3189		1.7116e-06	1.8111e-06	1.8522e-06	1.8655e-06	1.8922e-06	1.9228e-06	1.9581e-06	1.9757e-06	1.8111e-06	1.8655e-06		2.6417e-06	2.671e-06	2.759e-06	2.782e-06	2.793e-06	2.836e-06	2.809e-06	2.845e-06	2.796e-06	2.822e-06		4.259e-06	4.248e-06	4.292e-06	4.305e-06	4.867e-06	5.04e-06	5.257e-06	5.197e-06	5.256e-06	5.247e-06			2.67e-06	2.739e-06	2.714e-06	2.744e-06	2.755e-06	2.819e-06	2.858e-06	2.862e-06	2.849e-06	2.902e-06		2.2357e-06	2.4313e-06	2.4889e-06
0.3267		1.7642e-06	1.8543e-06	1.8967e-06	1.9121e-06	1.9507e-06	1.9718e-06	1.9891e-06	2.0058e-06	1.8543e-06	1.9121e-06		2.6394e-06	2.718e-06	2.735e-06	2.759e-06	2.794e-06	2.77e-06	2.78e-06	2.847e-06	2.846e-06	2.807e-06		4.444e-06	4.443e-06	4.483e-06	4.569e-06	5.141e-06	5.257e-06	5.508e-06	5.469e-06	5.529e-06	5.565e-06			2.694e-06	2.739e-06	2.803e-06	2.847e-06	2.879e-06	2.869e-06	2.908e-06	2.952e-06	2.96e-06	2.976e-06		2.2666e-06	2.4566e-06	2.5165e-06
0.3304		1.8033e-06	1.906e-06	1.9402e-06	1.9673e-06	1.9952e-06	2.029e-06	2.0424e-06	2.06e-06	1.906e-06	1.9673e-06		2.647e-06	2.684e-06	2.781e-06	2.742e-06	2.765e-06	2.816e-06	2.845e-06	2.809e-06	2.8e-06	2.856e-06		4.67e-06	4.675e-06	4.682e-06	4.747e-06	5.464e-06	5.601e-06	5.851e-06	5.755e-06	5.76e-06	5.794e-06			2.807e-06	2.829e-06	2.872e-06	2.874e-06	2.871e-06	2.994e-06	2.901e-06	2.949e-06	2.946e-06	2.965e-06		2.304e-06	2.4888e-06	2.5411e-06
0.3369		1.8634e-06	1.9595e-06	1.9944e-06	2.0126e-06	2.0342e-06	2.0597e-06	2.1016e-06	2.1142e-06	1.9595e-06	2.0126e-06		2.6549e-06	2.677e-06	2.764e-06	2.794e-06	2.805e-06	2.838e-06	2.81e-06	2.867e-06	2.813e-06	2.829e-06		4.909e-06	4.881e-06	4.953e-06	4.947e-06	5.714e-06	6.023e-06	6.179e-06	6.046e-06	6.102e-06	6.079e-06			2.849e-06	2.908e-06	2.885e-06	2.917e-06	2.961e-06	2.993e-06	3.015e-06	3.037e-06	3.031e-06	3.085e-06		2.333e-06	2.5293e-06	2.578e-06
0.3445		1.9182e-06	2.0017e-06	2.0426e-06	2.0529e-06	2.0862e-06	2.118e-06	2.1343e-06	2.1567e-06	2.0017e-06	2.0529e-06		2.6572e-06	2.751e-06	2.744e-06	2.79e-06	2.817e-06	2.782e-06	2.816e-06	2.858e-06	2.87e-06	2.822e-06		5.148e-06	5.109e-06	5.143e-06	5.225e-06	5.984e-06	6.281e-06	6.449e-06	6.377e-06	6.411e-06	6.431e-06			2.912e-06	2.941e-06	3.008e-06	3.05e-06	3.086e-06	3.081e-06	3.098e-06	3.154e-06	3.141e-06	3.17e-06		2.3667e-06	2.5514e-06	2.6104e-06
0.3482		1.945e-06	2.0468e-06	2.0771e-06	2.1082e-06	2.1327e-06	2.1701e-06	2.188e-06	2.2083e-06	2.0468e-06	2.1082e-06		2.6721e-06	2.71e-06	2.803e-06	2.772e-06	2.809e-06	2.842e-06	2.878e-06	2.836e-06	2.837e-06	2.882e-06		5.393e-06	5.366e-06	5.364e-06	5.429e-06	6.331e-06	6.655e-06	6.824e-06	6.691e-06	6.675e-06	6.706e-06			3.024e-06	3.072e-06	3.091e-06	3.102e-06	3.097e-06	3.203e-06	3.139e-06	3.159e-06	3.158e-06	3.17e-06		2.4098e-06	2.5843e-06	2.6355e-06
0.3548		1.9984e-06	2.0889e-06	2.1216e-06	2.1506e-06	2.1774e-06	2.2128e-06	2.2407e-06	2.2534e-06	2.0889e-06	2.1506e-06		2.733e-06	2.717e-06	2.787e-06	2.824e-06	2.838e-06	2.859e-06	2.846e-06	2.898e-06	2.846e-06	2.85e-06		5.608e-06	5.541e-06	5.645e-06	5.615e-06	6.585e-06	7.07e-06	7.163e-06	6.982e-06	7.014e-06	7.005e-06			3.086e-06	3.143e-06	3.115e-06	3.181e-06	3.191e-06	3.216e-06	3.254e-06	3.26e-06	3.251e-06	3.308e-06		2.4396e-06	2.6296e-06	2.6738e-06
0.3604		2.0506e-06	2.1232e-06	2.1646e-06	2.178e-06	2.219e-06	2.2494e-06	2.2745e-06	2.2964e-06	2.1232e-06	2.178e-06		2.674e-06	2.784e-06	2.776e-06	2.837e-06	2.867e-06	2.824e-06	2.875e-06	2.897e-06	2.914e-06	2.853e-06		5.829e-06	5.775e-06	5.798e-06	5.87e-06	6.808e-06	7.32e-06	7.438e-06	7.36e-06	7.346e-06	7.362e-06			3.191e-06	3.203e-06	3.266e-06	3.309e-06	3.331e-06	3.328e-06	3.349e-06	3.394e-06	3.385e-06	3.399e-06		2.4847e-06	2.6592e-06	2.766e-06
0.366		2.0728e-06	2.1666e-06	2.1934e-06	2.225e-06	2.2548e-06	2.2918e-06	2.316e-06	2.3374e-06	2.1666e-06	2.225e-06		2.75e-06	2.748e-06	2.854e-06	2.819e-06	2.863e-06	2.901e-06	2.925e-06	2.89e-06	2.888e-06	2.937e-06		6.039e-06	6e-06	5.998e-06	6.046e-06	7.103e-06	7.661e-06	7.797e-06	7.63e-06	7.606e-06	7.628e-06			3.315e-06	3.353e-06	3.364e-06	3.375e-06	3.366e-06	3.467e-06	3.421e-06	3.418e-06	3.404e-06	3.439e-06		2.5347e-06	2.7058e-06	2.75e-06
0.3728		2.1194e-06	2.2004e-06	2.2344e-06	2.2616e-06	2.294e-06	2.3362e-06	2.361e-06	2.3718e-06	2.2004e-06	2.2616e-06		2.771e-06	2.781e-06	2.841e-06	2.891e-06	2.901e-06	2.93e-06	2.922e-06	2.959e-06	2.912e-06	2.92e-06		6.208e-06	6.142e-06	6.238e-06	6.227e-06	7.303e-06	8.028e-06	8.112e-06	7.909e-06	7.913e-06	7.917e-06			3.38e-06	3.428e-06	3.399e-06	3.467e-06	3.465e-06	3.497e-06	3.515e-06	3.523e-06	3.509e-06	3.564e-06		2.5736e-06	2.807e-06	2.828e-06
0.3783		2.1646e-06	2.2212e-06	2.2649e-06	2.2779e-06	2.3148e-06	2.3544e-06	2.3914e-06	2.4094e-06	2.2212e-06	2.2779e-06		2.754e-06	2.852e-06	2.863e-06	2.941e-06	2.943e-06	2.921e-06	2.961e-06	2.979e-06	2.99e-06	2.94e-06		6.387e-06	6.359e-06	6.376e-06	6.454e-06	7.501e-06	8.251e-06	8.35e-06	8.259e-06	8.237e-06	8.253e-06			3.497e-06	3.501e-06	3.559e-06	3.584e-06	3.624e-06	3.598e-06	3.625e-06	3.658e-06	3.651e-06	3.672e-06		2.6266e-06	2.79e-06	2.879e-06
0.3809		2.186e-06	2.2556e-06	2.2757e-06	2.3141e-06	2.3456e-06	2.3942e-06	2.4083e-06	2.4312e-06	2.2556e-06	2.3141e-06		2.83e-06	2.832e-06	2.939e-06	2.908e-06	2.944e-06	2.987e-06	3.021e-06	2.984e-06	2.958e-06	3.031e-06		6.537e-06	6.51e-06	6.522e-06	6.632e-06	7.747e-06	8.551e-06	8.667e-06	8.481e-06	8.463e-06	8.521e-06			3.619e-06	3.647e-06	3.649e-06	3.647e-06	3.675e-06	3.743e-06	3.673e-06	3.696e-06	3.675e-06	3.722e-06		2.6856e-06	2.859e-06	2.876e-06
0.3911		2.2288e-06	2.2894e-06	2.3087e-06	2.3447e-06	2.381e-06	2.4301e-06	2.4502e-06	2.4645e-06	2.2894e-06	2.3447e-06		2.876e-06	2.88e-06	2.941e-06	2.976e-06	2.997e-06	3.042e-06	3.027e-06	3.062e-06	3.017e-06	3.031e-06		6.662e-06	6.614e-06	6.727e-06	6.743e-06	7.893e-06	8.876e-06	8.941e-06	8.743e-06	8.747e-06	8.766e-06			3.709e-06	3.725e-06	3.687e-06	3.752e-06	3.747e-06	3.802e-06	3.788e-06	3.782e-06	3.77e-06	3.816e-06		2.766e-06	2.962e-06	2.976e-06
0.3962		2.273e-06	2.3084e-06	2.339e-06	2.3496e-06	2.3864e-06	2.4302e-06	2.4721e-06	2.4907e-06	2.3084e-06	2.3496e-06		2.873e-06	2.955e-06	2.993e-06	3.029e-06	3.044e-06	3.045e-06	3.061e-06	3.08e-06	3.096e-06	3.075e-06		6.825e-06	6.806e-06	6.831e-06	6.882e-06	8.04e-06	9.053e-06	9.13e-06	9.05e-06	9.064e-06	9.064e-06			3.802e-06	3.787e-06	3.84e-06	3.862e-06	3.904e-06	3.868e-06	3.887e-06	3.918e-06	3.904e-06	3.918e-06		2.813e-06	2.973e-06	3.029e-06
0.401		2.2981e-06	2.3354e-06	2.3469e-06	2.3819e-06	2.4082e-06	2.4702e-06	2.4802e-06	2.4965e-06	2.3354e-06	2.3819e-06		2.938e-06	2.934e-06	3.053e-06	3.02e-06	3.039e-06	3.095e-06	3.119e-06	3.094e-06	3.082e-06	3.141e-06		6.9e-06	6.907e-06	6.957e-06	7.113e-06	8.265e-06	9.305e-06	9.42e-06	9.243e-06	9.237e-06	9.328e-06			3.913e-06	3.926e-06	3.925e-06	3.902e-06	3.942e-06	3.976e-06	3.934e-06	3.939e-06	3.949e-06	3.948e-06		2.917e-06	3.032e-06	3.032e-06
0.4087		2.3265e-06	2.3628e-06	2.3683e-06	2.4074e-06	2.4346e-06	2.4894e-06	2.5101e-06	2.5233e-06	2.3628e-06	2.4074e-06		2.988e-06	2.986e-06	3.05e-06	3.097e-06	3.098e-06	3.148e-06	3.129e-06	3.168e-06	3.127e-06	3.139e-06		6.995e-06	7e-06	7.116e-06	7.161e-06	8.392e-06	9.586e-06	9.636e-06	9.462e-06	9.494e-06	9.512e-06			3.965e-06	3.999e-06	3.959e-06	4e-06	4.007e-06	4.054e-06	4.001e-06	4.012e-06	3.998e-06	4.023e-06		2.961e-06	3.129e-06	3.15e-06
0.4143		2.3726e-06	2.384e-06	2.3941e-06	2.4058e-06	2.4424e-06	2.4894e-06	2.5258e-06	2.5446e-06	2.384e-06	2.4058e-06		2.998e-06	3.067e-06	3.1e-06	3.135e-06	3.153e-06	3.147e-06	3.163e-06	3.206e-06	3.201e-06	3.189e-06		7.162e-06	7.158e-06	7.221e-06	7.339e-06	8.531e-06	9.769e-06	9.836e-06	9.736e-06	9.791e-06	9.794e-06			4.067e-06	4.048e-06	4.084e-06	4.09e-06	4.136e-06	4.088e-06	4.1e-06	4.136e-06	4.107e-06	4.113e-06		3.007e-06	3.163e-06	3.227e-06
0.4231		2.402e-06	2.4031e-06	2.4063e-06	2.4319e-06	2.4559e-06	2.5204e-06	2.5293e-06	2.5514e-06	2.4031e-06	2.4319e-06		3.04e-06	3.063e-06	3.159e-06	3.104e-06	3.15e-06	3.209e-06	3.216e-06	3.204e-06	3.216e-06	3.24e-06		7.215e-06	7.252e-06	7.323e-06	7.514e-06	8.734e-06	9.976e-06	1.008e-05	9.925e-06	9.938e-06	1.0043e-05			4.183e-06	4.17e-06	4.164e-06	4.134e-06	4.162e-06	4.201e-06	4.127e-06	4.147e-06	4.146e-06	4.128e-06		3.127e-06	3.22e-06	3.247e-06
0.4264		2.4296e-06	2.4313e-06	2.4148e-06	2.4523e-06	2.4758e-06	2.5352e-06	2.5546e-06	2.5653e-06	2.4313e-06	2.4523e-06		3.097e-06	3.094e-06	3.165e-06	3.195e-06	3.223e-06	3.24e-06	3.237e-06	3.272e-06	3.231e-06	3.252e-06		7.299e-06	7.332e-06	7.487e-06	7.498e-06	8.839e-06	1.0249e-05	1.0282e-05	1.0134e-05	1.017e-05	1.0198e-05			4.22e-06	4.253e-06	4.204e-06	4.209e-06	4.216e-06	4.244e-06	4.192e-06	4.174e-06	4.176e-06	4.195e-06		3.163e-06	3.341e-06	3.355e-06
0.4327		2.4718e-06	2.4522e-06	2.441e-06	2.4553e-06	2.4885e-06	2.541e-06	2.5708e-06	2.5769e-06	2.4522e-06	2.4553e-06		3.085e-06	3.183e-06	3.193e-06	3.247e-06	3.258e-06	3.249e-06	3.259e-06	3.306e-06	3.297e-06	3.285e-06		7.461e-06	7.487e-06	7.61e-06	7.72e-06	9.006e-06	1.0431e-05	1.0493e-05	1.0385e-05	1.0461e-05	1.0481e-05			4.318e-06	4.263e-06	4.301e-06	4.299e-06	4.336e-06	4.252e-06	4.281e-06	4.298e-06	4.269e-06	4.278e-06		3.209e-06	3.363e-06	3.419e-06
0.4396		2.5035e-06	2.465e-06	2.457e-06	2.4728e-06	2.4946e-06	2.5605e-06	2.5676e-06	2.5968e-06	2.465e-06	2.4728e-06		3.138e-06	3.175e-06	3.241e-06	3.216e-06	3.238e-06	3.292e-06	3.322e-06	3.293e-06	3.315e-06	3.332e-06		7.521e-06	7.594e-06	7.666e-06	7.866e-06	9.178e-06	1.0618e-05	1.0695e-05	1.0574e-05	1.058e-05	1.0693e-05			4.436e-06	4.369e-06	4.357e-06	4.304e-06	4.352e-06	4.372e-06	4.273e-06	4.297e-06	4.298e-06	4.283e-06		3.333e-06	3.418e-06	3.463e-06
0.4444		2.5256e-06	2.4883e-06	2.4552e-06	2.492e-06	2.5133e-06	2.5793e-06	2.5857e-06	2.5946e-06	2.4883e-06	2.492e-06		3.198e-06	3.194e-06	3.254e-06	3.287e-06	3.319e-06	3.322e-06	3.315e-06	3.356e-06	3.317e-06	3.341e-06		7.588e-06	7.634e-06	7.812e-06	7.89e-06	9.261e-06	1.0876e-05	1.0883e-05	1.0742e-05	1.0803e-05	1.0845e-05			4.436e-06	4.466e-06	4.407e-06	4.383e-06	4.394e-06	4.4e-06	4.369e-06	4.319e-06	4.311e-06	4.334e-06		3.38e-06	3.553e-06	3.563e-06
0.4508		2.5744e-06	2.5156e-06	2.4809e-06	2.4991e-06	2.5268e-06	2.5882e-06	2.6014e-06	2.6124e-06	2.5156e-06	2.4991e-06		3.186e-06	3.28e-06	3.282e-06	3.324e-06	3.344e-06	3.33e-06	3.342e-06	3.383e-06	3.387e-06	3.369e-06		7.723e-06	7.78e-06	7.935e-06	8.037e-06	9.434e-06	1.1063e-05	1.1083e-05	1.0987e-05	1.1066e-05	1.1108e-05			4.528e-06	4.464e-06	4.484e-06	4.489e-06	4.512e-06	4.418e-06	4.417e-06	4.43e-06	4.403e-06	4.405e-06		3.433e-06	3.575e-06	3.626e-06
0.4563		2.6046e-06	2.524e-06	2.4947e-06	2.5044e-06	2.5235e-06	2.5891e-06	2.6004e-06	2.6248e-06	2.524e-06	2.5044e-06		3.23e-06	3.257e-06	3.321e-06	3.317e-06	3.319e-06	3.362e-06	3.412e-06	3.362e-06	3.37e-06	3.403e-06		7.744e-06	7.841e-06	7.929e-06	8.101e-06	9.556e-06	1.1218e-05	1.1265e-05	1.1167e-05	1.116e-05	1.1272e-05			4.652e-06	4.553e-06	4.517e-06	4.462e-06	4.512e-06	4.501e-06	4.412e-06	4.392e-06	4.418e-06	4.388e-06		3.555e-06	3.622e-06	3.675e-06
0.4618		2.6256e-06	2.5495e-06	2.4913e-06	2.523e-06	2.5429e-06	2.6134e-06	2.6095e-06	2.6147e-06	2.5495e-06	2.523e-06		3.291e-06	3.281e-06	3.337e-06	3.358e-06	3.389e-06	3.397e-06	3.384e-06	3.423e-06	3.383e-06	3.42e-06		7.794e-06	7.858e-06	8.04e-06	8.118e-06	9.606e-06	1.1464e-05	1.141e-05	1.1275e-05	1.1333e-05	1.1386e-05			4.621e-06	4.624e-06	4.552e-06	4.512e-06	4.55e-06	4.485e-06	4.486e-06	4.414e-06	4.403e-06	4.449e-06		3.601e-06	3.765e-06	3.763e-06
0.4689		2.6781e-06	2.5745e-06	2.5171e-06	2.5327e-06	2.5516e-06	2.6149e-06	2.623e-06	2.6299e-06	2.5745e-06	2.5327e-06		3.269e-06	3.357e-06	3.345e-06	3.397e-06	3.405e-06	3.387e-06	3.396e-06	3.437e-06	3.454e-06	3.428e-06		7.88e-06	7.935e-06	8.091e-06	8.205e-06	9.72e-06	1.1594e-05	1.1531e-05	1.1459e-05	1.1525e-05	1.1579e-05			4.681e-06	4.579e-06	4.59e-06	4.612e-06	4.625e-06	4.516e-06	4.506e-06	4.504e-06	4.482e-06	4.477e-06		3.668e-06	3.772e-06	3.824e-06
0.4746		2.764e-06	2.5796e-06	2.5309e-06	2.5356e-06	2.5461e-06	2.6238e-06	2.6283e-06	2.6371e-06	2.5796e-06	2.5356e-06		3.325e-06	3.342e-06	3.397e-06	3.376e-06	3.381e-06	3.432e-06	3.462e-06	3.405e-06	3.427e-06	3.475e-06		7.877e-06	7.991e-06	8.056e-06	8.26e-06	9.792e-06	1.1736e-05	1.1665e-05	1.1569e-05	1.1558e-05	1.1684e-05			4.78e-06	4.648e-06	4.621e-06	4.546e-06	4.591e-06	4.574e-06	4.474e-06	4.471e-06	4.479e-06	4.446e-06		3.775e-06	3.842e-06	3.866e-06
0.4767		2.743e-06	2.6066e-06	2.5291e-06	2.5566e-06	2.5689e-06	2.6443e-06	2.632e-06	2.6316e-06	2.6066e-06	2.5566e-06		3.361e-06	3.34e-06	3.39e-06	3.412e-06	3.437e-06	3.448e-06	3.432e-06	3.47e-06	3.423e-06	3.47e-06		7.872e-06	7.918e-06	8.11e-06	8.22e-06	9.807e-06	1.195e-05	1.1754e-05	1.1597e-05	1.1666e-05	1.1776e-05			4.724e-06	4.699e-06	4.618e-06	4.578e-06	4.633e-06	4.57e-06	4.529e-06	4.473e-06	4.472e-06	4.491e-06		3.822e-06	3.96e-06	3.954e-06
0.4866		2.84e-06	2.6393e-06	2.5586e-06	2.568e-06	2.5838e-06	2.6418e-06	2.6467e-06	2.6508e-06	2.6393e-06	2.568e-06		3.34e-06	3.419e-06	3.405e-06	3.456e-06	3.445e-06	3.436e-06	3.436e-06	3.473e-06	3.5e-06	3.475e-06		7.914e-06	7.959e-06	8.098e-06	8.222e-06	9.86e-06	1.2035e-05	1.1814e-05	1.1734e-05	1.1798e-05	1.1861e-05			4.756e-06	4.629e-06	4.642e-06	4.64e-06	4.666e-06	4.561e-06	4.523e-06	4.499e-06	4.51e-06	4.487e-06		3.896e-06	3.973e-06	4.014e-06
0.4925		2.884e-06	2.6536e-06	2.5749e-06	2.5714e-06	2.5789e-06	2.6597e-06	2.6543e-06	2.6589e-06	2.6536e-06	2.5714e-06		3.405e-06	3.391e-06	3.464e-06	3.41e-06	3.424e-06	3.492e-06	3.488e-06	3.442e-06	3.459e-06	3.532e-06		7.917e-06	7.987e-06	8.031e-06	8.239e-06	9.903e-06	1.2162e-05	1.1881e-05	1.1769e-05	1.1795e-05	1.1903e-05			4.821e-06	4.682e-06	4.655e-06	4.564e-06	4.632e-06	4.564e-06	4.477e-06	4.472e-06	4.487e-06	4.445e-06		3.982e-06	4.052e-06	4.059e-06
0.4988		2.922e-06	2.6857e-06	2.5861e-06	2.6028e-06	2.6042e-06	2.6798e-06	2.6646e-06	2.6692e-06	2.6857e-06	2.6028e-06		3.416e-06	3.397e-06	3.43e-06	3.44e-06	3.468e-06	3.476e-06	3.447e-06	3.498e-06	3.465e-06	3.501e-06		7.84e-06	7.876e-06	8.059e-06	8.198e-06	9.894e-06	1.233e-05	1.1917e-05	1.1744e-05	1.1801e-05	1.194e-05			4.742e-06	4.707e-06	4.626e-06	4.578e-06	4.66e-06	4.56e-06	4.516e-06	4.47e-06	4.478e-06	4.475e-06		4.035e-06	4.154e-06	4.142e-06
0.5045		2.966e-06	2.812e-06	2.6185e-06	2.6203e-06	2.6312e-06	2.753e-06	2.745e-06	2.694e-06	2.812e-06	2.6203e-06		3.392e-06	3.473e-06	3.438e-06	3.478e-06	3.482e-06	3.465e-06	3.464e-06	3.498e-06	3.532e-06	3.509e-06		7.863e-06	7.884e-06	8.015e-06	8.153e-06	9.913e-06	1.2388e-05	1.1924e-05	1.1813e-05	1.1879e-05	1.1964e-05			4.774e-06	4.627e-06	4.656e-06	4.627e-06	4.688e-06	4.553e-06	4.495e-06	4.506e-06	4.501e-06	4.462e-06		4.108e-06	4.165e-06	4.204e-06
0.5107		3.018e-06	2.798e-06	2.6448e-06	2.6374e-06	2.6292e-06	2.679e-06	2.758e-06	2.794e-06	2.798e-06	2.6374e-06		3.466e-06	3.435e-06	3.491e-06	3.435e-06	3.448e-06	3.512e-06	3.505e-06	3.482e-06	3.486e-06	3.56e-06		7.866e-06	7.892e-06	7.958e-06	8.147e-06	9.948e-06	1.2521e-05	1.1972e-05	1.1787e-05	1.1837e-05	1.1942e-05			4.821e-06	4.658e-06	4.637e-06	4.526e-06	4.626e-06	4.544e-06	4.443e-06	4.436e-06	4.456e-06	4.4e-06		4.195e-06	4.244e-06	4.243e-06
0.5194		3.099e-06	2.771e-06	2.6675e-06	2.664e-06	2.6644e-06	2.779e-06	2.688e-06	2.722e-06	2.771e-06	2.664e-06		3.458e-06	3.456e-06	3.455e-06	3.458e-06	3.49e-06	3.498e-06	3.463e-06	3.508e-06	3.508e-06	3.522e-06		7.772e-06	7.763e-06	7.946e-06	8.061e-06	9.902e-06	1.2641e-05	1.1937e-05	1.1722e-05	1.1777e-05	1.1916e-05			4.74e-06	4.67e-06	4.598e-06	4.54e-06	4.633e-06	4.521e-06	4.476e-06	4.423e-06	4.451e-06	4.444e-06		4.247e-06	4.346e-06	4.343e-06
0.5224		3.115e-06	2.905e-06	2.692e-06	2.734e-06	2.794e-06	2.802e-06	2.778e-06	2.729e-06	2.905e-06	2.734e-06		3.428e-06	3.502e-06	3.458e-06	3.495e-06	3.518e-06	3.478e-06	3.472e-06	3.503e-06	3.545e-06	3.519e-06		7.808e-06	7.785e-06	7.89e-06	8.019e-06	9.924e-06	1.2681e-05	1.1901e-05	1.174e-05	1.1796e-05	1.189e-05			4.743e-06	4.609e-06	4.64e-06	4.587e-06	4.639e-06	4.502e-06	4.46e-06	4.455e-06	4.436e-06	4.409e-06		4.318e-06	4.351e-06	4.384e-06
0.5289		3.187e-06	2.934e-06	2.793e-06	2.771e-06	2.723e-06	2.773e-06	2.808e-06	2.84e-06	2.934e-06	2.771e-06		3.489e-06	3.465e-06	3.498e-06	3.45e-06	3.461e-06	3.522e-06	3.509e-06	3.493e-06	3.494e-06	3.569e-06		7.816e-06	7.801e-06	7.869e-06	8.009e-06	1e-05	1.2827e-05	1.1954e-05	1.1698e-05	1.1715e-05	1.1839e-05			4.795e-06	4.627e-06	4.591e-06	4.495e-06	4.588e-06	4.496e-06	4.398e-06	4.393e-06	4.412e-06	4.356e-06		4.394e-06	4.419e-06	4.424e-06
0.5357		3.276e-06	2.883e-06	2.825e-06	2.78e-06	2.773e-06	2.852e-06	2.767e-06	2.833e-06	2.883e-06	2.78e-06		3.492e-06	3.492e-06	3.464e-06	3.49e-06	3.503e-06	3.498e-06	3.492e-06	3.515e-06	3.517e-06	3.527e-06		7.755e-06	7.695e-06	7.837e-06	7.926e-06	9.929e-06	1.2936e-05	1.1882e-05	1.1631e-05	1.1633e-05	1.1773e-05			4.735e-06	4.635e-06	4.57e-06	4.502e-06	4.602e-06	4.472e-06	4.424e-06	4.389e-06	4.406e-06	4.386e-06		4.458e-06	4.518e-06	4.531e-06
0.5404		3.277e-06	3.022e-06	2.8e-06	2.824e-06	2.872e-06	2.885e-06	2.831e-06	2.792e-06	3.022e-06	2.824e-06		3.467e-06	3.532e-06	3.481e-06	3.511e-06	3.538e-06	3.487e-06	3.478e-06	3.513e-06	3.552e-06	3.532e-06		7.805e-06	7.733e-06	7.803e-06	7.902e-06	9.968e-06	1.2998e-05	1.1858e-05	1.1624e-05	1.1654e-05	1.1738e-05			4.722e-06	4.589e-06	4.61e-06	4.552e-06	4.623e-06	4.475e-06	4.439e-06	4.398e-06	4.397e-06	4.376e-06		4.53e-06	4.536e-06	4.563e-06
0.5469		3.361e-06	3.079e-06	2.908e-06	2.902e-06	2.888e-06	2.935e-06	2.889e-06	2.913e-06	3.079e-06	2.902e-06		3.518e-06	3.491e-06	3.516e-06	3.469e-06	3.476e-06	3.53e-06	3.522e-06	3.498e-06	3.505e-06	3.575e-06		7.832e-06	7.76e-06	7.797e-06	7.915e-06	1.0065e-05	1.3133e-05	1.1926e-05	1.1578e-05	1.1563e-05	1.169e-05			4.797e-06	4.589e-06	4.563e-06	4.484e-06	4.582e-06	4.452e-06	4.355e-06	4.342e-06	4.377e-06	4.331e-06		4.617e-06	4.61e-06	4.598e-06
0.5528		3.482e-06	3.011e-06	2.927e-06	2.885e-06	2.877e-06	2.951e-06	2.926e-06	2.943e-06	3.011e-06	2.885e-06		3.529e-06	3.521e-06	3.484e-06	3.525e-06	3.524e-06	3.507e-06	3.515e-06	3.521e-06	3.523e-06	3.534e-06		7.804e-06	7.702e-06	7.789e-06	7.856e-06	1.0001e-05	1.3283e-05	1.188e-05	1.1554e-05	1.1512e-05	1.1632e-05			4.743e-06	4.615e-06	4.548e-06	4.473e-06	4.589e-06	4.441e-06	4.393e-06	4.353e-06	4.369e-06	4.369e-06		4.67e-06	4.7e-06	4.706e-06
0.557		3.482e-06	3.182e-06	2.921e-06	2.94e-06	3.021e-06	2.997e-06	2.941e-06	2.887e-06	3.182e-06	2.94e-06		3.515e-06	3.563e-06	3.506e-06	3.534e-06	3.553e-06	3.512e-06	3.496e-06	3.525e-06	3.567e-06	3.55e-06		7.91e-06	7.758e-06	7.806e-06	7.867e-06	1.007e-05	1.3384e-05	1.1885e-05	1.1539e-05	1.154e-05	1.1624e-05			4.728e-06	4.573e-06	4.589e-06	4.537e-06	4.641e-06	4.439e-06	4.423e-06	4.368e-06	4.371e-06	4.378e-06		4.741e-06	4.719e-06	4.738e-06
0.565		3.589e-06	3.255e-06	3.046e-06	3.05e-06	3.038e-06	3.102e-06	3.019e-06	3.02e-06	3.255e-06	3.05e-06		3.573e-06	3.542e-06	3.561e-06	3.5e-06	3.501e-06	3.556e-06	3.549e-06	3.512e-06	3.536e-06	3.601e-06		7.951e-06	7.823e-06	7.811e-06	7.914e-06	1.0195e-05	1.355e-05	1.1972e-05	1.1538e-05	1.1482e-05	1.1586e-05			4.796e-06	4.591e-06	4.563e-06	4.501e-06	4.583e-06	4.464e-06	4.345e-06	4.337e-06	4.378e-06	4.316e-06		4.85e-06	4.796e-06	4.783e-06
0.5707		3.704e-06	3.189e-06	3.115e-06	3.006e-06	3.058e-06	3.08e-06	3.105e-06	3.069e-06	3.189e-06	3.006e-06		3.613e-06	3.567e-06	3.541e-06	3.557e-06	3.557e-06	3.563e-06	3.537e-06	3.534e-06	3.553e-06	3.578e-06		7.976e-06	7.82e-06	7.852e-06	7.888e-06	1.0176e-05	1.3717e-05	1.1983e-05	1.154e-05	1.1461e-05	1.1552e-05			4.752e-06	4.625e-06	4.552e-06	4.491e-06	4.609e-06	4.455e-06	4.402e-06	4.354e-06	4.372e-06	4.361e-06		4.891e-06	4.904e-06	4.885e-06
0.5728		3.802e-06	3.37e-06	3.097e-06	3.091e-06	3.224e-06	3.149e-06	3.068e-06	2.988e-06	3.37e-06	3.091e-06		3.574e-06	3.61e-06	3.547e-06	3.574e-06	3.589e-06	3.54e-06	3.526e-06	3.557e-06	3.59e-06	3.586e-06		8.082e-06	7.883e-06	7.891e-06	7.956e-06	1.0248e-05	1.3821e-05	1.2023e-05	1.1571e-05	1.1515e-05	1.1589e-05			4.764e-06	4.594e-06	4.609e-06	4.56e-06	4.681e-06	4.463e-06	4.435e-06	4.419e-06	4.412e-06	4.406e-06		4.96e-06	4.913e-06	4.913e-06
0.5827		3.822e-06	3.46e-06	3.199e-06	3.223e-06	3.284e-06	3.273e-06	3.165e-06	3.157e-06	3.46e-06	3.223e-06		3.644e-06	3.594e-06	3.611e-06	3.544e-06	3.533e-06	3.601e-06	3.581e-06	3.541e-06	3.566e-06	3.637e-06		8.163e-06	7.983e-06	7.928e-06	7.993e-06	1.0393e-05	1.4018e-05	1.2147e-05	1.1592e-05	1.1472e-05	1.1557e-05			4.84e-06	4.619e-06	4.597e-06	4.529e-06	4.624e-06	4.514e-06	4.373e-06	4.362e-06	4.393e-06	4.347e-06		5.075e-06	4.995e-06	4.962e-06
0.5889		3.984e-06	3.481e-06	3.303e-06	3.175e-06	3.241e-06	3.236e-06	3.275e-06	3.231e-06	3.481e-06	3.175e-06		3.7e-06	3.625e-06	3.613e-06	3.604e-06	3.602e-06	3.62e-06	3.577e-06	3.588e-06	3.592e-06	3.638e-06		8.258e-06	8.037e-06	8.004e-06	8.002e-06	1.0398e-05	1.4237e-05	1.2188e-05	1.1636e-05	1.1535e-05	1.1554e-05			4.817e-06	4.689e-06	4.614e-06	4.535e-06	4.677e-06	4.496e-06	4.44e-06	4.406e-06	4.421e-06	4.413e-06		5.12e-06	5.116e-06	5.074e-06
0.596		4.126e-06	3.6e-06	3.373e-06	3.277e-06	3.413e-06	3.334e-06	3.235e-06	3.178e-06	3.6e-06	3.277e-06		3.662e-06	3.697e-06	3.615e-06	3.619e-06	3.644e-06	3.6e-06	3.564e-06	3.6e-06	3.656e-06	3.638e-06		8.353e-06	8.109e-06	8.076e-06	8.127e-06	1.0511e-05	1.4352e-05	1.2276e-05	1.1705e-05	1.1596e-05	1.1652e-05			4.832e-06	4.676e-06	4.698e-06	4.629e-06	4.758e-06	4.531e-06	4.491e-06	4.492e-06	4.488e-06	4.466e-06		5.197e-06	5.114e-06	5.104e-06
0.6006		4.101e-06	3.712e-06	3.431e-06	3.429e-06	3.455e-06	3.459e-06	3.345e-06	3.337e-06	3.712e-06	3.429e-06		3.735e-06	3.684e-06	3.681e-06	3.612e-06	3.609e-06	3.667e-06	3.64e-06	3.598e-06	3.626e-06	3.698e-06		8.461e-06	8.242e-06	8.145e-06	8.186e-06	1.0674e-05	1.4549e-05	1.2442e-05	1.1782e-05	1.161e-05	1.1653e-05			4.955e-06	4.735e-06	4.706e-06	4.617e-06	4.715e-06	4.612e-06	4.442e-06	4.451e-06	4.47e-06	4.424e-06		5.316e-06	5.208e-06	5.163e-06
0.6069		4.264e-06	3.806e-06	3.543e-06	3.45e-06	3.475e-06	3.443e-06	3.494e-06	3.433e-06	3.806e-06	3.45e-06		3.8e-06	3.723e-06	3.694e-06	3.676e-06	3.681e-06	3.695e-06	3.644e-06	3.673e-06	3.661e-06	3.705e-06		8.587e-06	8.315e-06	8.271e-06	8.227e-06	1.0712e-05	1.4815e-05	1.2562e-05	1.1858e-05	1.1721e-05	1.1678e-05			4.953e-06	4.805e-06	4.73e-06	4.641e-06	4.803e-06	4.603e-06	4.54e-06	4.505e-06	4.522e-06	4.509e-06		5.359e-06	5.339e-06	5.284e-06
0.6148		4.441e-06	3.858e-06	3.676e-06	3.506e-06	3.595e-06	3.549e-06	3.43e-06	3.455e-06	3.858e-06	3.506e-06		3.773e-06	3.826e-06	3.704e-06	3.708e-06	3.733e-06	3.681e-06	3.645e-06	3.676e-06	3.749e-06	3.709e-06		8.694e-06	8.422e-06	8.347e-06	8.373e-06	1.0831e-05	1.4923e-05	1.2664e-05	1.198e-05	1.1818e-05	1.1818e-05			5.012e-06	4.825e-06	4.834e-06	4.774e-06	4.899e-06	4.668e-06	4.621e-06	4.609e-06	4.599e-06	4.578e-06		5.454e-06	5.346e-06	5.339e-06
0.6185		4.387e-06	3.996e-06	3.689e-06	3.69e-06	3.675e-06	3.708e-06	3.559e-06	3.568e-06	3.996e-06	3.69e-06		3.858e-06	3.798e-06	3.784e-06	3.713e-06	3.725e-06	3.755e-06	3.729e-06	3.684e-06	3.715e-06	3.779e-06		8.805e-06	8.57e-06	8.451e-06	8.451e-06	1.0991e-05	1.5137e-05	1.2856e-05	1.2098e-05	1.1874e-05	1.1851e-05			5.138e-06	4.924e-06	4.887e-06	4.778e-06	4.867e-06	4.765e-06	4.608e-06	4.59e-06	4.603e-06	4.551e-06		5.577e-06	5.437e-06	5.393e-06
0.625		4.578e-06	4.123e-06	3.835e-06	3.791e-06	3.776e-06	3.74e-06	3.743e-06	3.677e-06	4.123e-06	3.791e-06		3.934e-06	3.854e-06	3.809e-06	3.795e-06	3.793e-06	3.786e-06	3.75e-06	3.774e-06	3.763e-06	3.799e-06		8.946e-06	8.672e-06	8.634e-06	8.536e-06	1.1075e-05	1.5421e-05	1.304e-05	1.2222e-05	1.2014e-05	1.1941e-05			5.173e-06	5.009e-06	4.917e-06	4.848e-06	4.979e-06	4.777e-06	4.713e-06	4.686e-06	4.682e-06	4.683e-06		5.629e-06	5.583e-06	5.522e-06
0.631		4.758e-06	4.168e-06	4.017e-06	3.78e-06	3.85e-06	3.803e-06	3.737e-06	3.765e-06	4.168e-06	3.78e-06		3.913e-06	3.974e-06	3.832e-06	3.861e-06	3.861e-06	3.789e-06	3.789e-06	3.788e-06	3.867e-06	3.811e-06		9.083e-06	8.799e-06	8.711e-06	8.706e-06	1.1182e-05	1.5524e-05	1.3145e-05	1.241e-05	1.2169e-05	1.2107e-05			5.276e-06	5.056e-06	5.05e-06	4.989e-06	5.117e-06	4.863e-06	4.818e-06	4.804e-06	4.782e-06	4.769e-06		5.741e-06	5.594e-06	5.599e-06
0.6363		4.691e-06	4.32e-06	4.004e-06	3.976e-06	3.962e-06	3.988e-06	3.844e-06	3.818e-06	4.32e-06	3.976e-06		4.024e-06	3.949e-06	3.928e-06	3.857e-06	3.868e-06	3.888e-06	3.861e-06	3.813e-06	3.838e-06	3.902e-06		9.224e-06	8.964e-06	8.833e-06	8.819e-06	1.1375e-05	1.5742e-05	1.3376e-05	1.2536e-05	1.2245e-05	1.2184e-05			5.414e-06	5.182e-06	5.129e-06	5.012e-06	5.121e-06	4.981e-06	4.845e-06	4.799e-06	4.812e-06	4.782e-06		5.874e-06	5.713e-06	5.652e-06
0.6432		4.896e-06	4.461e-06	4.167e-06	4.124e-06	4.116e-06	4.108e-06	4.031e-06	3.953e-06	4.461e-06	4.124e-06		4.107e-06	4.02e-06	3.966e-06	3.945e-06	3.941e-06	3.938e-06	3.896e-06	3.908e-06	3.901e-06	3.932e-06		9.351e-06	9.064e-06	9.034e-06	8.906e-06	1.1475e-05	1.6008e-05	1.3566e-05	1.2676e-05	1.241e-05	1.2307e-05			5.454e-06	5.287e-06	5.184e-06	5.126e-06	5.231e-06	5.026e-06	4.953e-06	4.915e-06	4.899e-06	4.908e-06		5.942e-06	5.86e-06	5.793e-06
0.6485		5.101e-06	4.489e-06	4.373e-06	4.087e-06	4.159e-06	4.098e-06	4.098e-06	4.082e-06	4.489e-06	4.087e-06		4.115e-06	4.15e-06	4.007e-06	4.041e-06	4.027e-06	3.958e-06	3.956e-06	3.939e-06	4.011e-06	3.962e-06		9.472e-06	9.247e-06	9.129e-06	9.089e-06	1.1568e-05	1.6131e-05	1.3698e-05	1.293e-05	1.2593e-05	1.2496e-05			5.595e-06	5.35e-06	5.329e-06	5.271e-06	5.404e-06	5.137e-06	5.08e-06	5.07e-06	5.047e-06	5.029e-06		6.05e-06	5.888e-06	5.877e-06
0.6521		5.051e-06	4.665e-06	4.343e-06	4.315e-06	4.288e-06	4.327e-06	4.146e-06	4.131e-06	4.665e-06	4.315e-06		4.239e-06	4.152e-06	4.123e-06	4.039e-06	4.05e-06	4.073e-06	4.038e-06	3.99e-06	4.002e-06	4.073e-06		9.653e-06	9.425e-06	9.268e-06	9.245e-06	1.1768e-05	1.6361e-05	1.395e-05	1.3057e-05	1.273e-05	1.2635e-05			5.75e-06	5.509e-06	5.446e-06	5.322e-06	5.44e-06	5.286e-06	5.143e-06	5.092e-06	5.097e-06	5.085e-06		6.198e-06	6.02e-06	5.948e-06
0.661		5.232e-06	4.824e-06	4.532e-06	4.482e-06	4.461e-06	4.462e-06	4.367e-06	4.296e-06	4.824e-06	4.482e-06		4.34e-06	4.249e-06	4.178e-06	4.153e-06	4.143e-06	4.136e-06	4.093e-06	4.099e-06	4.09e-06	4.121e-06		9.792e-06	9.54e-06	9.486e-06	9.36e-06	1.1869e-05	1.662e-05	1.4147e-05	1.324e-05	1.2917e-05	1.2783e-05			5.828e-06	5.64e-06	5.513e-06	5.477e-06	5.568e-06	5.367e-06	5.275e-06	5.229e-06	5.217e-06	5.219e-06		6.295e-06	6.182e-06	6.099e-06
0.6665		5.458e-06	4.877e-06	4.733e-06	4.449e-06	4.517e-06	4.482e-06	4.487e-06	4.444e-06	4.877e-06	4.449e-06		4.384e-06	4.389e-06	4.261e-06	4.268e-06	4.25e-06	4.2e-06	4.17e-06	4.14e-06	4.218e-06	4.19e-06		1e-05	9.771e-06	9.606e-06	9.573e-06	1.1989e-05	1.675e-05	1.4318e-05	1.3509e-05	1.316e-05	1.3009e-05			5.983e-06	5.735e-06	5.715e-06	5.623e-06	5.758e-06	5.496e-06	5.429e-06	5.415e-06	5.383e-06	5.362e-06		6.397e-06	6.245e-06	6.208e-06
0.6697		5.493e-06	5.056e-06	4.778e-06	4.696e-06	4.665e-06	4.706e-06	4.522e-06	4.487e-06	5.056e-06	4.696e-06		4.508e-06	4.408e-06	4.374e-06	4.285e-06	4.29e-06	4.315e-06	4.265e-06	4.219e-06	4.218e-06	4.298e-06		1.0147e-05	9.919e-06	9.786e-06	9.774e-06	1.2198e-05	1.6976e-05	1.4582e-05	1.3666e-05	1.3301e-05	1.3208e-05			6.175e-06	5.933e-06	5.847e-06	5.727e-06	5.847e-06	5.673e-06	5.518e-06	5.495e-06	5.48e-06	5.455e-06		6.558e-06	6.374e-06	6.276e-06
0.679		5.617e-06	5.246e-06	4.938e-06	4.9e-06	4.877e-06	4.874e-06	4.767e-06	4.684e-06	5.246e-06	4.9e-06		4.636e-06	4.54e-06	4.463e-06	4.43e-06	4.4e-06	4.401e-06	4.346e-06	4.354e-06	4.342e-06	4.37e-06		1.0276e-05	1.0083e-05	9.995e-06	9.894e-06	1.2331e-05	1.7262e-05	1.4825e-05	1.3902e-05	1.3553e-05	1.3375e-05			6.287e-06	6.084e-06	5.96e-06	5.903e-06	6.006e-06	5.818e-06	5.679e-06	5.646e-06	5.614e-06	5.612e-06		6.672e-06	6.554e-06	6.468e-06
0.6847		5.869e-06	5.385e-06	5.189e-06	4.873e-06	4.912e-06	4.875e-06	4.913e-06	4.869e-06	5.385e-06	4.873e-06		4.708e-06	4.694e-06	4.572e-06	4.553e-06	4.54e-06	4.491e-06	4.437e-06	4.43e-06	4.488e-06	4.468e-06		1.0559e-05	1.0337e-05	1.0184e-05	1.0138e-05	1.2476e-05	1.7428e-05	1.5026e-05	1.4193e-05	1.3861e-05	1.3641e-05			6.485e-06	6.23e-06	6.184e-06	6.091e-06	6.225e-06	5.951e-06	5.877e-06	5.87e-06	5.81e-06	5.794e-06		6.788e-06	6.643e-06	6.584e-06
0.693		5.958e-06	5.504e-06	5.282e-06	5.15e-06	5.096e-06	5.145e-06	4.955e-06	4.954e-06	5.504e-06	5.15e-06		4.839e-06	4.748e-06	4.694e-06	4.592e-06	4.6e-06	4.617e-06	4.555e-06	4.512e-06	4.529e-06	4.589e-06		1.0714e-05	1.0537e-05	1.0397e-05	1.0419e-05	1.2716e-05	1.7652e-05	1.532e-05	1.4396e-05	1.4019e-05	1.3896e-05			6.697e-06	6.455e-06	6.363e-06	6.233e-06	6.351e-06	6.176e-06	6.013e-06	5.987e-06	5.963e-06	5.928e-06		6.959e-06	6.774e-06	6.686e-06
0.6966		6.042e-06	5.726e-06	5.41e-06	5.374e-06	5.339e-06	5.344e-06	5.219e-06	5.145e-06	5.726e-06	5.374e-06		4.986e-06	4.876e-06	4.796e-06	4.756e-06	4.745e-06	4.72e-06	4.663e-06	4.669e-06	4.648e-06	4.675e-06		1.0911e-05	1.0718e-05	1.0661e-05	1.055e-05	1.286e-05	1.7944e-05	1.5578e-05	1.4649e-05	1.4296e-05	1.4095e-05			6.856e-06	6.657e-06	6.524e-06	6.446e-06	6.523e-06	6.343e-06	6.21e-06	6.164e-06	6.128e-06	6.129e-06		7.074e-06	6.978e-06	6.882e-06
0.6969		6.318e-06	5.934e-06	5.684e-06	5.451e-06	5.44e-06	5.362e-06	5.414e-06	5.36e-06	5.934e-06	5.451e-06		5.078e-06	5.057e-06	4.922e-06	4.899e-06	4.891e-06	4.833e-06	4.778e-06	4.784e-06	4.82e-06	4.796e-06		1.1209e-05	1.1006e-05	1.0901e-05	1.0842e-05	1.3059e-05	1.8146e-05	1.5848e-05	1.4968e-05	1.4645e-05	1.441e-05			7.086e-06	6.827e-06	6.78e-06	6.691e-06	6.794e-06	6.539e-06	6.444e-06	6.44e-06	6.358e-06	6.351e-06		7.197e-06	7.076e-06	7.016e-06
0.6926		5.876e-06	5.468e-06	5.332e-06	5.151e-06	5.059e-06	5.123e-06	4.94e-06	5.049e-06	5.468e-06	5.151e-06		4.666e-06	4.591e-06	4.519e-06	4.413e-06	4.419e-06	4.429e-06	4.378e-06	4.322e-06	4.344e-06	4.384e-06		1.0189e-05	1.0112e-05	9.934e-06	1.0001e-05	1.2051e-05	1.663e-05	1.4564e-05	1.372e-05	1.3365e-05	1.3246e-05			6.576e-06	6.329e-06	6.233e-06	6.117e-06	6.217e-06	6.056e-06	5.889e-06	5.887e-06	5.838e-06	5.807e-06		6.792e-06	6.633e-06	6.566e-06
0.6847		5.008e-06	4.788e-06	4.516e-06	4.522e-06	4.455e-06	4.505e-06	4.376e-06	4.295e-06	4.788e-06	4.522e-06		3.875e-06	3.77e-06	3.702e-06	3.668e-06	3.669e-06	3.631e-06	3.566e-06	3.575e-06	3.543e-06	3.568e-06		8.552e-06	8.397e-06	8.386e-06	8.263e-06	1.0051e-05	1.4063e-05	1.2182e-05	1.1436e-05	1.1176e-05	1.1016e-05			5.439e-06	5.313e-06	5.198e-06	5.111e-06	5.168e-06	5.045e-06	4.93e-06	4.878e-06	4.845e-06	4.839e-06		5.894e-06	5.848e-06	5.765e-06
0.679		4.53e-06	4.276e-06	4.082e-06	3.958e-06	3.95e-06	3.881e-06	3.902e-06	3.85e-06	4.276e-06	3.958e-06		3.259e-06	3.262e-06	3.144e-06	3.138e-06	3.123e-06	3.06e-06	3.024e-06	3.037e-06	3.051e-06	3.02e-06		7.394e-06	7.246e-06	7.206e-06	7.118e-06	8.65e-06	1.2006e-05	1.0411e-05	9.812e-06	9.612e-06	9.458e-06			4.696e-06	4.515e-06	4.495e-06	4.456e-06	4.512e-06	4.315e-06	4.276e-06	4.271e-06	4.214e-06	4.204e-06		5.221e-06	5.18e-06	5.141e-06
0.673		4.04e-06	3.702e-06	3.667e-06	3.523e-06	3.437e-06	3.511e-06	3.397e-06	3.484e-06	3.702e-06	3.523e-06		2.826e-06	2.794e-06	2.728e-06	2.668e-06	2.65e-06	2.652e-06	2.648e-06	2.574e-06	2.589e-06	2.613e-06		6.391e-06	6.287e-06	6.198e-06	6.21e-06	7.528e-06	1.0328e-05	8.993e-06	8.466e-06	8.214e-06	8.169e-06			4.162e-06	3.989e-06	3.933e-06	3.838e-06	3.915e-06	3.827e-06	3.704e-06	3.694e-06	3.68e-06	3.648e-06		4.744e-06	4.664e-06	4.634e-06
0.6662		3.52e-06	3.401e-06	3.197e-06	3.238e-06	3.184e-06	3.225e-06	3.108e-06	3.045e-06	3.401e-06	3.238e-06		2.491e-06	2.401e-06	2.363e-06	2.343e-06	2.35e-06	2.328e-06	2.269e-06	2.272e-06	2.236e-06	2.254e-06		5.594e-06	5.466e-06	5.462e-06	5.356e-06	6.547e-06	9.024e-06	7.792e-06	7.304e-06	7.149e-06	7.059e-06			3.614e-06	3.53e-06	3.452e-06	3.407e-06	3.436e-06	3.344e-06	3.322e-06	3.24e-06	3.218e-06	3.248e-06		4.279e-06	4.306e-06	4.243e-06
0.6607		3.299e-06	3.151e-06	2.982e-06	2.917e-06	2.912e-06	2.872e-06	2.866e-06	2.821e-06	3.151e-06	2.917e-06		2.132e-06	2.0303e-06	1.9824e-06	1.9583e-06	1.9475e-06	1.9256e-06	1.8968e-06	1.8814e-06	1.8838e-06	1.8808e-06		4.949e-06	4.866e-06	4.778e-06	4.753e-06	5.793e-06	7.768e-06	6.787e-06	6.412e-06	6.297e-06	6.203e-06			3.212e-06	3.086e-06	3.073e-06	3.081e-06	3.11e-06	2.948e-06	2.94e-06	2.943e-06	2.904e-06	2.889e-06		3.876e-06	3.874e-06	3.87e-06
0.6548		3.033e-06	2.714e-06	2.77e-06	2.617e-06	2.541e-06	2.606e-06	2.58e-06	2.632e-06	2.714e-06	2.617e-06		1.8e-06	1.7677e-06	1.732e-06	1.7032e-06	1.6927e-06	1.6793e-06	1.6557e-06	1.6356e-06	1.6335e-06	1.6358e-06		4.38e-06	4.321e-06	4.215e-06	4.221e-06	5.131e-06	6.824e-06	5.96e-06	5.636e-06	5.445e-06	5.429e-06			2.925e-06	2.792e-06	2.77e-06	2.68e-06	2.755e-06	2.685e-06	2.606e-06	2.592e-06	2.565e-06	2.547e-06		3.579e-06	3.554e-06	3.532e-06
0.6456		2.669e-06	2.561e-06	2.374e-06	2.458e-06	2.429e-06	2.434e-06	2.336e-06	2.271e-06	2.561e-06	2.458e-06		1.5682e-06	1.5362e-06	1.5067e-06	1.4831e-06	1.4778e-06	1.4637e-06	1.4368e-06	1.4267e-06	1.4159e-06	1.418e-06		3.905e-06	3.79e-06	3.793e-06	3.717e-06	4.517e-06	6.059e-06	5.231e-06	4.893e-06	4.804e-06	4.761e-06			2.551e-06	2.531e-06	2.445e-06	2.43e-06	2.474e-06	2.381e-06	2.382e-06	2.307e-06	2.283e-06	2.328e-06		3.262e-06	3.327e-06	3.275e-06
0.6426		2.529e-06	2.434e-06	2.2065e-06	2.241e-06	2.1387e-06	2.211e-06	2.1037e-06	2.0853e-06	2.434e-06	2.241e-06		1.3622e-06	1.3381e-06	1.31e-06	1.2943e-06	1.2854e-06	1.2664e-06	1.2469e-06	1.2376e-06	1.2335e-06	1.2272e-06		3.527e-06	3.435e-06	3.393e-06	3.356e-06	4.053e-06	5.287e-06	4.603e-06	4.357e-06	4.296e-06	4.222e-06			2.31e-06	2.204e-06	2.208e-06	2.1092e-06	2.246e-06	2.0708e-06	2.0257e-06	2.0164e-06	2.0035e-06	1.9973e-06		3.003e-06	3.013e-06	3.025e-06
0.6368		2.345e-06	2.095e-06	2.0301e-06	1.9758e-06	1.9475e-06	1.9599e-06	1.9286e-06	1.918e-06	2.095e-06	1.9758e-06		1.1871e-06	1.1599e-06	1.14e-06	1.1184e-06	1.1101e-06	1.1007e-06	1.0843e-06	1.067e-06	1.0618e-06	1.0626e-06		3.178e-06	3.116e-06	2.975e-06	3.013e-06	3.617e-06	4.649e-06	4.067e-06	3.861e-06	3.737e-06	3.743e-06			2.0182e-06	1.9448e-06	1.9224e-06	1.8957e-06	1.9325e-06	1.874e-06	1.827e-06	1.8192e-06	1.8035e-06	1.7931e-06		2.786e-06	2.805e-06	2.777e-06
0.629		2.0648e-06	1.9401e-06	1.8559e-06	1.8305e-06	1.8051e-06	1.8037e-06	1.7711e-06	1.7515e-06	1.9401e-06	1.8305e-06		1.0245e-06	1.001e-06	9.834e-07	9.683e-07	9.622e-07	9.513e-07	9.321e-07	9.259e-07	9.124e-07	9.128e-07		2.801e-06	2.717e-06	2.688e-06	2.678e-06	3.224e-06	4.125e-06	3.602e-06	3.35e-06	3.304e-06	3.292e-06			1.8154e-06	1.7585e-06	1.7318e-06	1.7116e-06	1.7467e-06	1.6859e-06	1.6483e-06	1.6406e-06	1.626e-06	1.6228e-06		2.553e-06	2.638e-06	2.588e-06
0.6243		1.8969e-06	1.7982e-06	1.7205e-06	1.688e-06	1.6705e-06	1.665e-06	1.6377e-06	1.6179e-06	1.7982e-06	1.688e-06		8.806e-07	8.661e-07	8.475e-07	8.342e-07	8.261e-07	8.137e-07	8.009e-07	7.952e-07	7.877e-07	7.797e-07		2.565e-06	2.487e-06	2.453e-06	2.412e-06	2.898e-06	3.656e-06	3.163e-06	3.018e-06	2.977e-06	2.926e-06			1.642e-06	1.5814e-06	1.566e-06	1.5501e-06	1.5808e-06	1.5199e-06	1.4875e-06	1.4822e-06	1.4689e-06	1.4659e-06		2.361e-06	2.398e-06	2.413e-06
0.6187		1.7446e-06	1.6515e-06	1.5906e-06	1.552e-06	1.5226e-06	1.5264e-06	1.5102e-06	1.5032e-06	1.6515e-06	1.552e-06		7.59e-07	7.377e-07	7.3e-07	7.096e-07	7.044e-07	7.002e-07	6.854e-07	6.734e-07	6.65e-07	6.658e-07		2.358e-06	2.275e-06	2.159e-06	2.0718e-06	2.613e-06	3.263e-06	2.842e-06	2.693e-06	2.622e-06	2.602e-06			1.4902e-06	1.4347e-06	1.4131e-06	1.395e-06	1.4243e-06	1.3778e-06	1.3431e-06	1.3389e-06	1.324e-06	1.3172e-06		2.1146e-06	2.1678e-06	2.1513e-06
0.6151		1.6091e-06	1.5229e-06	1.4661e-06	1.4412e-06	1.4185e-06	1.4152e-06	1.3841e-06	1.3757e-06	1.5229e-06	1.4412e-06		6.45e-07	6.248e-07	6.148e-07	6.034e-07	5.989e-07	5.894e-07	5.746e-07	5.717e-07	5.585e-07	5.531e-07		1.9904e-06	1.9145e-06	1.8856e-06	1.858e-06	2.349e-06	2.925e-06	2.51e-06	2.333e-06	2.301e-06	2.3e-06			1.341e-06	1.2984e-06	1.2758e-06	1.2585e-06	1.2897e-06	1.244e-06	1.2171e-06	1.2043e-06	1.1995e-06	1.1937e-06		1.9585e-06	2.0213e-06	2.0032e-06
0.6063		1.4745e-06	1.417e-06	1.3523e-06	1.3322e-06	1.316e-06	1.3087e-06	1.2878e-06	1.2688e-06	1.417e-06	1.3322e-06		5.344e-07	5.26e-07	5.14e-07	5.053e-07	4.98e-07	4.867e-07	4.767e-07	4.724e-07	4.636e-07	4.544e-07		1.8003e-06	1.7258e-06	1.6976e-06	1.6652e-06	2.0074e-06	2.553e-06	2.211e-06	1.978e-06	1.9469e-06	1.9352e-06			1.2107e-06	1.1644e-06	1.1566e-06	1.1404e-06	1.1684e-06	1.1197e-06	1.0958e-06	1.0885e-06	1.0774e-06	1.0699e-06		1.8101e-06	1.8728e-06	1.8603e-06
0.6006		1.3714e-06	1.3066e-06	1.2572e-06	1.2339e-06	1.2072e-06	1.2003e-06	1.1898e-06	1.1884e-06	1.3066e-06	1.2339e-06		4.498e-07	4.328e-07	4.331e-07	4.162e-07	4.099e-07	4.06e-07	3.961e-07	3.865e-07	3.736e-07	3.754e-07		1.6254e-06	1.5597e-06	1.5166e-06	1.4987e-06	1.8129e-06	2.271e-06	1.871e-06	1.7541e-06	1.7236e-06	1.7138e-06			1.1014e-06	1.0578e-06	1.0446e-06	1.0251e-06	1.052e-06	1.0147e-06	9.845e-07	9.819e-07	9.734e-07	9.674e-07		1.6808e-06	1.7402e-06	1.733e-06
0.5963		1.2722e-06	1.2056e-06	1.1656e-06	1.1363e-06	1.122e-06	1.1214e-06	1.091e-06	1.0907e-06	1.2056e-06	1.1363e-06		3.646e-07	3.525e-07	3.451e-07	3.387e-07	3.331e-07	3.241e-07	3.121e-07	3.1e-07	2.973e-07	2.9e-07		1.4673e-06	1.3967e-06	1.373e-06	1.344e-06	1.6232e-06	1.93e-06	1.654e-06	1.5448e-06	1.5186e-06	1.5108e-06			9.916e-07	9.529e-07	9.415e-07	9.243e-07	9.516e-07	9.136e-07	8.949e-07	8.855e-07	8.788e-07	8.757e-07		1.5566e-06	1.6235e-06	1.6152e-06
0.5885		1.1685e-06	1.1251e-06	1.0735e-06	1.0559e-06	1.0457e-06	1.0373e-06	1.0175e-06	1.006e-06	1.1251e-06	1.0559e-06		2.837e-07	2.802e-07	2.737e-07	2.635e-07	2.628e-07	2.498e-07	2.412e-07	2.381e-07	2.27e-07	2.192e-07		1.3252e-06	1.2627e-06	1.2339e-06	1.203e-06	1.4564e-06	1.7086e-06	1.4561e-06	1.3632e-06	1.3417e-06	1.3315e-06			8.951e-07	8.593e-07	8.526e-07	8.387e-07	8.6e-07	8.264e-07	8.054e-07	7.98e-07	7.898e-07	7.808e-07		1.4403e-06	1.5059e-06	1.499e-06
0.5828		1.0847e-06	1.0436e-06	1.0013e-06	9.822e-07	9.631e-07	9.556e-07	9.406e-07	9.402e-07	1.0436e-06	9.822e-07		2.174e-07	2.051e-07	2.094e-07	1.955e-07	1.892e-07	1.861e-07	-6.645e-08	-6.979e-08	-8.081e-08	-8.517e-08		1.2024e-06	1.1387e-06	1.109e-06	1.0817e-06	1.3128e-06	1.5139e-06	1.2885e-06	1.2009e-06	1.1761e-06	1.1704e-06			8.106e-07	7.734e-07	7.608e-07	7.496e-07	7.728e-07	7.386e-07	7.192e-07	7.13e-07	7.08e-07	6.99e-07		1.3352e-06	1.4025e-06	1.3898e-06
0.5768		1.0086e-06	9.548e-07	9.227e-07	9.023e-07	8.916e-07	8.873e-07	8.71e-07	8.624e-07	9.548e-07	9.023e-07		-8.588e-08	-9.318e-08	-9.307e-08	-9.915e-08	-1.0497e-07	-1.1049e-07	-1.3549e-07	-1.3892e-07	-1.5137e-07	-1.5793e-07		1.0767e-06	1.0126e-06	9.921e-07	9.648e-07	1.1697e-06	1.3422e-06	1.1291e-06	1.0462e-06	1.0235e-06	1.0168e-06			7.256e-07	6.923e-07	6.824e-07	6.706e-07	6.899e-07	6.59e-07	6.466e-07	6.392e-07	6.304e-07	6.28e-07		1.2331e-06	1.3027e-06	1.2973e-06
0.569		9.24e-07	8.972e-07	8.486e-07	8.384e-07	8.312e-07	8.2e-07	8.034e-07	7.945e-07	8.972e-07	8.384e-07		-1.5625e-07	-1.6369e-07	-1.6313e-07	-1.6974e-07	-1.7637e-07	-1.8278e-07	-1.9565e-07	-1.9865e-07	-2.1199e-07	-2.1889e-07		9.662e-07	9.162e-07	8.818e-07	8.613e-07	1.044e-06	1.1704e-06	9.843e-07	9.099e-07	8.937e-07	8.842e-07			6.467e-07	6.155e-07	6.127e-07	6.051e-07	6.174e-07	5.888e-07	5.735e-07	5.697e-07	5.632e-07	5.601e-07		1.1385e-06	1.201e-06	1.1997e-06
0.5647		8.603e-07	8.291e-07	7.971e-07	7.805e-07	7.666e-07	7.646e-07	7.44e-07	7.419e-07	8.291e-07	7.805e-07		-2.1609e-07	-2.2316e-07	-2.21e-07	-2.2793e-07	-2.3545e-07	-2.4051e-07	-2.5023e-07	-2.5321e-07	-2.6756e-07	-2.741e-07		8.74e-07	8.176e-07	7.911e-07	7.682e-07	9.357e-07	1.0348e-06	8.609e-07	7.877e-07	7.698e-07	7.617e-07			5.783e-07	5.459e-07	5.4e-07	5.309e-07	5.459e-07	5.247e-07	5.023e-07	4.996e-07	4.987e-07	4.892e-07		1.0518e-06	1.1144e-06	1.1075e-06
0.5584		7.974e-07	7.542e-07	7.343e-07	7.139e-07	7.033e-07	7.02e-07	6.923e-07	6.853e-07	7.542e-07	7.139e-07		-2.7028e-07	-2.768e-07	-2.7423e-07	-2.8022e-07	-2.873e-07	-2.9271e-07	-3.0117e-07	-3.0442e-07	-7.11e-08	-8.03e-08		7.768e-07	7.247e-07	6.956e-07	6.756e-07	8.197e-07	9.043e-07	7.421e-07	6.754e-07	6.554e-07	6.549e-07			5.112e-07	4.837e-07	4.725e-07	4.664e-07	4.807e-07	4.607e-07	4.472e-07	4.412e-07	4.314e-07	4.314e-07		9.64e-07	1.0312e-06	1.025e-06
0.5486		7.34e-07	7.097e-07	6.697e-07	6.589e-07	6.564e-07	6.431e-07	6.301e-07	6.186e-07	7.097e-07	6.589e-07		-7.59e-08	-8.1e-08	-7.87e-08	-8.31e-08	-8.67e-08	-9.74e-08	-1.02e-07	-1.04e-07	-3.0553e-07	-3.1196e-07		6.944e-07	6.404e-07	6.167e-07	5.954e-07	7.274e-07	7.777e-07	6.317e-07	5.71e-07	5.573e-07	5.533e-07			4.451e-07	4.187e-07	4.179e-07	4.084e-07	4.284e-07	3.986e-07	3.876e-07	3.831e-07	3.791e-07	3.774e-07		8.801e-07	9.48e-07	9.435e-07
0.5466		6.754e-07	6.555e-07	6.216e-07	6.14e-07	6.041e-07	6.016e-07	5.822e-07	5.805e-07	6.555e-07	6.14e-07		-3.1155e-07	-3.1691e-07	-3.1277e-07	-3.1769e-07	-3.2303e-07	-3.2768e-07	-3.2768e-07	-3.2768e-07	-1.616e-07	-1.656e-07		6.151e-07	5.642e-07	5.36e-07	5.19e-07	6.428e-07	6.632e-07	5.341e-07	4.71e-07	4.555e-07	4.574e-07			3.886e-07	3.581e-07	3.549e-07	3.502e-07	3.631e-07	3.445e-07	3.254e-07	3.249e-07	3.173e-07	3.135e-07		8.035e-07	8.644e-07	8.591e-07
0.5408		6.268e-07	5.967e-07	5.764e-07	5.552e-07	5.463e-07	5.427e-07	5.423e-07	5.348e-07	5.967e-07	5.552e-07		-1.611e-07	-1.698e-07	-1.639e-07	-1.669e-07	-1.727e-07	-1.772e-07	-1.857e-07	-1.902e-07	-3.2768e-07	-3.2768e-07		5.364e-07	4.904e-07	4.591e-07	4.4e-07	5.502e-07	5.576e-07	4.383e-07	3.834e-07	3.704e-07	3.655e-07			3.307e-07	3.072e-07	2.976e-07	2.933e-07	3.089e-07	2.896e-07	2.785e-07	2.751e-07	2.7e-07	2.669e-07		7.252e-07	7.915e-07	7.892e-07
0.534		5.813e-07	5.559e-07	5.313e-07	5.143e-07	5.131e-07	5.021e-07	4.856e-07	4.739e-07	5.559e-07	5.143e-07		-3.2768e-07	-3.2768e-07	-3.2768e-07	-3.2768e-07	-3.2768e-07	-3.2768e-07	-3.2768e-07	-3.2768e-07	-2.385e-07	-2.501e-07		4.692e-07	4.208e-07	3.967e-07	3.807e-07	4.723e-07	4.621e-07	3.468e-07	2.992e-07	2.869e-07	2.828e-07			2.691e-07	2.511e-07	2.506e-07	2.444e-07	2.617e-07	2.389e-07	2.295e-07	2.282e-07	2.244e-07	2.202e-07		6.521e-07	7.148e-07	7.135e-07
0.5284		5.236e-07	5.121e-07	4.868e-07	4.8e-07	4.691e-07	4.643e-07	4.485e-07	4.444e-07	5.121e-07	4.8e-07		-2.453e-07	-2.509e-07	-2.405e-07	-2.531e-07	-2.563e-07	-2.571e-07	-2.592e-07	-2.697e-07	-3.2768e-07	-2.761e-07		4.001e-07	3.556e-07	3.292e-07	3.092e-07	4.001e-07	3.672e-07	2.679e-07	2.185e-07	2.01e-07	2.008e-07			2.237e-07	2.017e-07	1.99e-07	1.95e-07	2.041e-07	-2.2991e-07	-2.4127e-07	-2.4255e-07	-2.4897e-07	-2.5057e-07		5.851e-07	6.452e-07	6.375e-07
0.5231		4.824e-07	4.646e-07	4.472e-07	4.288e-07	4.183e-07	4.075e-07	4.136e-07	4.085e-07	4.646e-07	4.288e-07		-2.752e-07	-2.834e-07	-3.2768e-07	-2.776e-07	-2.81e-07	-2.863e-07	-2.932e-07	-2.947e-07	-3.169e-07	-3.151e-07		3.372e-07	2.918e-07	2.682e-07	2.443e-07	3.26e-07	2.814e-07	1.83e-07	-3.2768e-07	-3.2768e-07	-3.2768e-07			-2.4591e-07	-2.5599e-07	-2.5855e-07	-2.6356e-07	-2.5552e-07	-3.2333e-07	-3.2768e-07	-3.2768e-07	-3.2768e-07	-3.2768e-07		5.109e-07	5.784e-07	5.716e-07
0.5192		4.486e-07	4.24e-07	4.107e-07	3.914e-07	3.87e-07	3.767e-07	3.628e-07	3.604e-07	4.24e-07	3.914e-07		-3.169e-07	-3.143e-07	-3.207e-07	-3.147e-07	-3.15e-07	-3.262e-07	-3.293e-07	-3.301e-07	-3.425e-07	-3.519e-07		2.755e-07	2.319e-07	2.074e-07	1.898e-07	2.539e-07	1.857e-07	-3.2768e-07	4.64e-08	3.86e-08	3.31e-08			-3.2768e-07	-3.2768e-07	-3.2768e-07	-3.2768e-07	-3.2768e-07	8.46e-08	7.96e-08	7.89e-08	7.29e-08	6.9e-08		4.42e-07	5.027e-07	5.02e-07
0.5109		3.955e-07	3.876e-07	3.656e-07	3.626e-07	3.527e-07	3.451e-07	3.314e-07	3.35e-07	3.876e-07	3.626e-07		-3.489e-07	-3.543e-07	-3.447e-07	-3.517e-07	-3.533e-07	-3.563e-07	-3.565e-07	-3.669e-07	-3.792e-07	-3.829e-07		2.124e-07	-2.6821e-07	-2.9136e-07	-3.1083e-07	1.926e-07	-3.2768e-07	1.1e-08	-3.2768e-07	-3.2768e-07	-3.2768e-07			6.3e-08	4.64e-08	4.77e-08	4.1e-08	5.03e-08	-3.2768e-07	-3.2768e-07	-3.2768e-07	-3.2768e-07	-3.2768e-07		3.795e-07	4.347e-07	4.3e-07
0.5048		3.625e-07	3.517e-07	3.34e-07	3.244e-07	3.168e-07	3.005e-07	3.027e-07	2.934e-07	3.517e-07	3.244e-07		-3.831e-07	-3.896e-07	-3.801e-07	-3.819e-07	-3.863e-07	-3.884e-07	-3.953e-07	-3.962e-07	-4.134e-07	-4.188e-07		-2.7531e-07	1.047e-07	8.62e-08	5.93e-08	-3.2259e-07	4.9e-09	-3.2768e-07	-1.111e-07	-1.168e-07	-1.335e-07			-3.2768e-07	-3.2768e-07	-3.2768e-07	-3.2768e-07	-3.2768e-07	-9.5e-09	-1.02e-08	-1.56e-08	-2.03e-08	-1.94e-08		3.075e-07	3.755e-07	3.675e-07
0.4991		3.325e-07	3.112e-07	3.038e-07	2.821e-07	2.798e-07	2.69e-07	2.554e-07	2.619e-07	3.112e-07	2.821e-07		-4.275e-07	-4.205e-07	-4.193e-07	-4.181e-07	-4.204e-07	-4.296e-07	-4.298e-07	-4.326e-07	-4.412e-07	-4.566e-07		8.49e-08	-3.2768e-07	-3.2768e-07	-3.2768e-07	4.15e-08	-3.2768e-07	-1.615e-07	-3.2768e-07	-3.2768e-07	-3.2768e-07			-4.23e-08	-5.34e-08	-5.14e-08	-4.79e-08	-3.97e-08	-3.2768e-07	-3.2768e-07	-3.2768e-07	-3.2768e-07	-3.2768e-07		2.436e-07	3.027e-07	3.006e-07
0.4923		2.768e-07	2.779e-07	2.587e-07	2.573e-07	2.499e-07	2.407e-07	2.253e-07	2.276e-07	2.779e-07	2.573e-07		-4.58e-07	-4.633e-07	-4.488e-07	-4.569e-07	-4.57e-07	-4.617e-07	-4.588e-07	-4.705e-07	-4.815e-07	-4.865e-07		-3.2768e-07	-1.38e-08	-4.18e-08	-6.06e-08	-3.2768e-07	-1.944e-07	-3.2768e-07	-2.716e-07	-2.836e-07	-2.959e-07			-3.2768e-07	-3.2768e-07	-3.2768e-07	-3.2768e-07	-3.2768e-07	-9.91e-08	-1.091e-07	-1.128e-07	-1.154e-07	-1.173e-07		1.808e-07	2.357e-07	2.271e-07
0.4871		2.505e-07	2.478e-07	2.292e-07	2.25e-07	2.205e-07	-6.151e-08	-7.121e-08	-7.619e-08	2.478e-07	2.25e-07		-4.967e-07	-5.018e-07	-4.916e-07	-4.919e-07	-4.938e-07	-4.977e-07	-5.012e-07	-5.044e-07	-5.205e-07	-5.275e-07		-4.38e-08	-3.2768e-07	-3.2768e-07	-3.2768e-07	-9.95e-08	-3.2768e-07	-3.351e-07	-3.601e-07	-3.639e-07	-3.779e-07			-1.526e-07	-1.577e-07	-1.571e-07	-1.544e-07	-1.474e-07	-3.2768e-07	-3.2768e-07	-3.2768e-07	-3.2768e-07	-3.2768e-07		-1.3065e-07	-8.512e-08	-9.398e-08
0.4812		2.251e-07	2.057e-07	-5.823e-08	-6.9e-08	-7.752e-08	-1.0486e-07	-1.1484e-07	-1.1871e-07	2.057e-07	-6.9e-08		-5.396e-07	-5.321e-07	-5.293e-07	-5.255e-07	-5.277e-07	-5.378e-07	-5.339e-07	-5.387e-07	-5.494e-07	-5.644e-07		-3.2768e-07	-1.46e-07	-1.75e-07	-1.894e-07	-3.2768e-07	-4.13e-07	-4.283e-07	-4.427e-07	-4.52e-07	-4.643e-07			-3.2768e-07	-3.2768e-07	-3.2768e-07	-3.2768e-07	-3.2768e-07	-2.039e-07	-2.047e-07	-2.051e-07	-2.093e-07	-2.088e-07		-2.0926e-07	-1.6001e-07	-1.6937e-07
0.4734		-5.923e-08	-7.257e-08	-1.0214e-07	-1.1221e-07	-1.2293e-07	-1.3757e-07	-1.4971e-07	-1.5471e-07	-7.257e-08	-1.1221e-07		-5.737e-07	-5.766e-07	-5.612e-07	-5.667e-07	-5.668e-07	-5.689e-07	-5.659e-07	-5.772e-07	-5.901e-07	-5.94e-07		-1.756e-07	-3.2768e-07	-3.2768e-07	-3.2768e-07	-2.537e-07	-5.104e-07	-5.261e-07	-5.456e-07	-5.559e-07	-5.697e-07			-2.666e-07	-2.677e-07	-2.627e-07	-2.635e-07	-2.561e-07	-3.2768e-07	-3.2768e-07	-3.2768e-07	-3.2768e-07	-3.2768e-07		-2.7739e-07	-2.2729e-07	-2.3801e-07
0.4696		-1.0171e-07	-1.1731e-07	-1.3498e-07	-1.4581e-07	-1.5685e-07	-1.697e-07	-1.8131e-07	-1.8695e-07	-1.1731e-07	-1.4581e-07		-6.112e-07	-6.157e-07	-6.038e-07	-6.016e-07	-6.014e-07	-6.056e-07	-6.083e-07	-6.093e-07	-6.273e-07	-6.348e-07		-3.2768e-07	-2.903e-07	-3.103e-07	-3.392e-07	-3.305e-07	-6.299e-07	-6.377e-07	-6.619e-07	-6.599e-07	-6.763e-07			-3.265e-07	-3.225e-07	-3.217e-07	-3.11e-07	-3.063e-07	-3.169e-07	-3.139e-07	-3.143e-07	-3.233e-07	-3.161e-07		-9.22e-08	-2.9341e-07	-3.0463e-07
0.4629		-1.3654e-07	-1.5304e-07	-1.663e-07	-1.7989e-07	-1.9026e-07	-2.0367e-07	-2.1328e-07	-2.1781e-07	-1.5304e-07	-1.7989e-07		-6.579e-07	-6.525e-07	-6.433e-07	-6.383e-07	-6.415e-07	-6.481e-07	-6.455e-07	-6.502e-07	-6.601e-07	-6.762e-07		-3.301e-07	-3.551e-07	-3.862e-07	-4.103e-07	-4.239e-07	-7.717e-07	-7.712e-07	-7.767e-07	-7.761e-07	-7.919e-07			-3.935e-07	-3.888e-07	-3.809e-07	-3.712e-07	-3.597e-07	-3.687e-07	-3.654e-07	-3.618e-07	-3.647e-07	-3.623e-07		-3.2768e-07	-1.071e-07	-1.111e-07
0.4528		-1.7102e-07	-1.8616e-07	-1.9969e-07	-2.1044e-07	-2.2173e-07	-2.3481e-07	-2.4691e-07	-2.5155e-07	-1.8616e-07	-2.1044e-07		-6.959e-07	-7.002e-07	-6.79e-07	-6.834e-07	-6.832e-07	-6.847e-07	-6.822e-07	-6.921e-07	-7.061e-07	-7.101e-07		-4.102e-07	-4.451e-07	-4.746e-07	-4.916e-07	-5.214e-07	-9.187e-07	-9.008e-07	-9.171e-07	-9.113e-07	-9.197e-07			-4.641e-07	-4.557e-07	-4.446e-07	-4.387e-07	-4.304e-07	-4.281e-07	-4.333e-07	-4.277e-07	-4.342e-07	-4.277e-07		-2.151e-07	-3.2768e-07	-3.2768e-07
0.451		-2.0495e-07	-2.1849e-07	-2.3158e-07	-2.4282e-07	-2.5365e-07	-2.6761e-07	-2.7907e-07	-2.8333e-07	-2.1849e-07	-2.4282e-07		-7.408e-07	-7.423e-07	-7.269e-07	-7.222e-07	-7.263e-07	-7.257e-07	-7.268e-07	-7.291e-07	-7.471e-07	-7.57e-07		-5.117e-07	-5.412e-07	-5.682e-07	-5.941e-07	-6.289e-07	-1.083e-06	-1.0513e-06	-1.0643e-06	-1.0537e-06	-1.0712e-06			-5.475e-07	-5.338e-07	-5.29e-07	-5.081e-07	-5.028e-07	-4.996e-07	-4.972e-07	-4.905e-07	-5.002e-07	-4.869e-07		-3.2768e-07	-2.307e-07	-2.398e-07
0.4448		-2.3815e-07	-2.5218e-07	-2.64e-07	-2.7716e-07	-2.8809e-07	-2.94e-08	-2.61e-08	-3.15e-08	-2.5218e-07	-2.7716e-07		-7.881e-07	-7.84e-07	-7.691e-07	-7.653e-07	-7.655e-07	-7.707e-07	-7.705e-07	-7.732e-07	-7.849e-07	-7.989e-07		-6.049e-07	-6.407e-07	-6.725e-07	-6.999e-07	-7.559e-07	-1.2605e-06	-1.2252e-06	-1.2228e-06	-1.2063e-06	-1.2257e-06			-6.342e-07	-6.161e-07	-6.022e-07	-5.839e-07	-5.738e-07	-5.751e-07	-5.643e-07	-5.554e-07	-5.629e-07	-5.536e-07		-3.445e-07	-3.2768e-07	-3.2768e-07
0.4397		-2.7301e-07	-2.8736e-07	-2.9799e-07	-3.13e-08	-4.33e-08	-2.8079e-07	-2.9024e-07	-2.9458e-07	-2.8736e-07	-3.13e-08		-8.317e-07	-8.353e-07	-8.132e-07	-8.177e-07	-8.147e-07	-8.135e-07	-8.127e-07	-8.206e-07	-8.345e-07	-8.399e-07		-7.229e-07	-7.609e-07	-7.903e-07	-8.104e-07	-8.805e-07	-1.4497e-06	-1.3996e-06	-1.4018e-06	-1.3838e-06	-1.3936e-06			-7.202e-07	-6.974e-07	-6.846e-07	-6.652e-07	-6.537e-07	-6.428e-07	-6.439e-07	-6.358e-07	-6.421e-07	-6.308e-07		-3.959e-07	-3.603e-07	-3.743e-07
0.4326		-6.35e-08	-5.09e-08	-6.64e-08	-2.9056e-07	-2.9953e-07	-8.71e-08	-9.92e-08	-1.007e-07	-5.09e-08	-2.9056e-07		-8.814e-07	-8.865e-07	-8.681e-07	-8.614e-07	-8.633e-07	-8.63e-07	-8.649e-07	-8.66e-07	-8.843e-07	-8.971e-07		-8.526e-07	-8.892e-07	-9.2e-07	-9.543e-07	-1.0313e-06	-1.6551e-06	-1.602e-06	-1.601e-06	-1.5798e-06	-1.6002e-06			-8.197e-07	-7.949e-07	-7.787e-07	-7.517e-07	-7.459e-07	-7.319e-07	-7.258e-07	-7.159e-07	-7.204e-07	-7.065e-07		-4.625e-07	-4.164e-07	-4.283e-07
0.427		-2.8928e-07	-2.9969e-07	-3.081e-07	-1.089e-07	-1.153e-07	-3.2768e-07	-3.2768e-07	-3.2768e-07	-2.9969e-07	-1.089e-07		-9.305e-07	-9.28e-07	-9.129e-07	-9.077e-07	-9.072e-07	-9.098e-07	-9.107e-07	-9.097e-07	-9.253e-07	-9.411e-07		-9.781e-07	-1.0195e-06	-1.0544e-06	-1.0837e-06	-1.1915e-06	-1.8743e-06	-1.8111e-06	-1.8035e-06	-1.7775e-06	-1.7949e-06			-9.162e-07	-8.878e-07	-8.645e-07	-8.353e-07	-8.277e-07	-8.183e-07	-8.027e-07	-7.884e-07	-7.977e-07	-7.859e-07		-5.231e-07	-4.796e-07	-4.873e-07
0.4234		-1.205e-07	-1.268e-07	-1.248e-07	-3.2768e-07	-3.2768e-07	-1.644e-07	-1.808e-07	-1.667e-07	-1.268e-07	-3.2768e-07		-9.766e-07	-9.797e-07	-9.575e-07	-9.601e-07	-9.611e-07	-9.574e-07	-9.554e-07	-9.625e-07	-9.787e-07	-9.863e-07		-1.1259e-06	-1.1652e-06	-1.2068e-06	-1.2313e-06	-1.3504e-06	-2.1106e-06	-2.0333e-06	-2.0213e-06	-1.9977e-06	-2.0086e-06			-1.0132e-06	-9.798e-07	-9.526e-07	-9.285e-07	-9.177e-07	-8.982e-07	-8.938e-07	-8.751e-07	-8.775e-07	-8.678e-07		-5.76e-07	-5.418e-07	-5.522e-07
0.4151		-3.2768e-07	-3.2768e-07	-3.2768e-07	-1.674e-07	-1.757e-07	-3.2768e-07	-3.2768e-07	-3.2768e-07	-3.2768e-07	-1.674e-07		-1.0242e-06	-1.0299e-06	-1.0114e-06	-1.0037e-06	-1.0021e-06	-1.0057e-06	-1.0077e-06	-1.0071e-06	-1.028e-06	-1.0414e-06		-1.2788e-06	-1.3228e-06	-1.3569e-06	-1.3946e-06	-1.5321e-06	-2.3411e-06	-2.2617e-06	-2.2549e-06	-2.2281e-06	-2.2489e-06			-1.1171e-06	-1.076e-06	-1.0505e-06	-1.0192e-06	-1.0139e-06	-9.934e-07	-9.76e-07	-9.63e-07	-9.631e-07	-9.477e-07		-6.424e-07	-5.971e-07	-6.115e-07
0.409		-1.922e-07	-1.862e-07	-1.94e-07	-3.2768e-07	-3.2768e-07	-2.45e-07	-2.405e-07	-2.441e-07	-1.862e-07	-3.2768e-07		-1.0777e-06	-1.0756e-06	-1.0588e-06	-1.0539e-06	-1.0523e-06	-1.0574e-06	-1.0559e-06	-1.0544e-06	-1.0731e-06	-1.0905e-06		-1.4272e-06	-1.4766e-06	-1.5153e-06	-1.5547e-06	-1.7139e-06	-2.5853e-06	-2.503e-06	-2.4877e-06	-2.4564e-06	-2.479e-06			-1.2163e-06	-1.1739e-06	-1.1427e-06	-1.1037e-06	-1.0988e-06	-1.0815e-06	-1.0603e-06	-1.0387e-06	-1.0475e-06	-1.03e-06		-7.034e-07	-6.62e-07	-6.741e-07
0.4037		-3.2768e-07	-3.2768e-07	-3.2768e-07	-2.498e-07	-2.6e-07	-2.776e-07	-3.2768e-07	-2.765e-07	-3.2768e-07	-2.498e-07		-1.1258e-06	-1.1277e-06	-1.1085e-06	-1.1066e-06	-1.1073e-06	-1.1069e-06	-1.1012e-06	-1.1111e-06	-1.1254e-06	-1.143e-06		-1.5906e-06	-1.6441e-06	-1.6905e-06	-1.7216e-06	-1.9087e-06	-2.8393e-06	-2.7533e-06	-2.7356e-06	-2.7076e-06	-2.7252e-06			-1.3133e-06	-1.2693e-06	-1.2365e-06	-1.2015e-06	-1.1915e-06	-1.1675e-06	-1.1562e-06	-1.1339e-06	-1.1351e-06	-1.1185e-06		-7.607e-07	-7.27e-07	-7.413e-07
0.3963		-2.807e-07	-2.683e-07	-2.811e-07	-2.77e-07	-2.862e-07	-3.033e-07	-3.255e-07	-3.28e-07	-2.683e-07	-2.77e-07		-1.1724e-06	-1.1803e-06	-1.1609e-06	-1.1538e-06	-1.1522e-06	-1.1556e-06	-1.1579e-06	-1.1587e-06	-1.1809e-06	-1.1963e-06		-1.7515e-06	-1.8095e-06	-1.8543e-06	-1.9024e-06	-2.1077e-06	-2.96e-06	-2.895e-06	-2.917e-06	-2.88e-06	-2.914e-06			-1.4171e-06	-1.3618e-06	-1.3323e-06	-1.2911e-06	-1.2864e-06	-1.2587e-06	-1.2345e-06	-1.2194e-06	-1.222e-06	-1.2e-06		-8.229e-07	-7.865e-07	-8.024e-07
0.3903		-3.02e-07	-2.999e-07	-3.058e-07	-3.147e-07	-3.227e-07	-3.533e-07	-3.549e-07	-3.565e-07	-2.999e-07	-3.147e-07		-1.2275e-06	-1.2256e-06	-1.2114e-06	-1.2046e-06	-1.2085e-06	-1.2107e-06	-1.2095e-06	-1.2102e-06	-1.2314e-06	-1.2495e-06		-1.9094e-06	-1.969e-06	-2.0207e-06	-2.0713e-06	-2.3005e-06	-3.228e-06	-3.154e-06	-3.118e-06	-3.074e-06	-3.118e-06			-1.5128e-06	-1.4669e-06	-1.4241e-06	-1.3799e-06	-1.3742e-06	-1.3514e-06	-1.3275e-06	-1.3009e-06	-1.3046e-06	-1.2827e-06		-8.855e-07	-8.551e-07	-8.658e-07
0.3844		-3.353e-07	-3.499e-07	-3.395e-07	-3.574e-07	-3.702e-07	-3.886e-07	-4.028e-07	-3.923e-07	-3.499e-07	-3.574e-07		-1.2743e-06	-1.2798e-06	-1.2615e-06	-1.2588e-06	-1.2625e-06	-1.2631e-06	-1.2564e-06	-1.2667e-06	-1.286e-06	-1.302e-06		-2.0628e-06	-2.1323e-06	-2.193e-06	-2.2403e-06	-2.4966e-06	-3.505e-06	-3.396e-06	-3.329e-06	-3.384e-06	-3.355e-06			-1.6068e-06	-1.5539e-06	-1.5165e-06	-1.4778e-06	-1.4697e-06	-1.4369e-06	-1.4164e-06	-1.394e-06	-1.3935e-06	-1.3744e-06		-9.409e-07	-9.19e-07	-9.334e-07
0.3765		-3.85e-07	-3.776e-07	-3.919e-07	-3.877e-07	-3.984e-07	-4.238e-07	-4.405e-07	-4.434e-07	-3.776e-07	-3.877e-07		-1.3234e-06	-1.3349e-06	-1.3166e-06	-1.3118e-06	-1.3105e-06	-1.3151e-06	-1.3162e-06	-1.3164e-06	-1.3431e-06	-1.36e-06		-2.2191e-06	-2.2972e-06	-2.3517e-06	-2.4154e-06	-2.6975e-06	-3.686e-06	-3.62e-06	-3.657e-06	-3.618e-06	-3.665e-06			-1.7077e-06	-1.6439e-06	-1.6131e-06	-1.5663e-06	-1.5621e-06	-1.5306e-06	-1.5044e-06	-1.4854e-06	-1.4908e-06	-1.4595e-06		-1.0059e-06	-9.759e-07	-9.967e-07
0.3729		-4.164e-07	-4.083e-07	-4.161e-07	-4.286e-07	-4.369e-07	-4.687e-07	-4.77e-07	-4.765e-07	-4.083e-07	-4.286e-07		-1.3845e-06	-1.3892e-06	-1.3779e-06	-1.3678e-06	-1.3702e-06	-1.378e-06	-1.3764e-06	-1.3756e-06	-1.399e-06	-1.4252e-06		-2.3692e-06	-2.4521e-06	-2.5193e-06	-2.5849e-06	-2.795e-06	-3.97e-06	-3.898e-06	-3.868e-06	-3.824e-06	-3.872e-06			-1.8097e-06	-1.7545e-06	-1.7155e-06	-1.6641e-06	-1.6588e-06	-1.6357e-06	-1.6098e-06	-1.5777e-06	-1.5792e-06	-1.5615e-06		-1.0678e-06	-1.0457e-06	-1.0619e-06
0.3668		-4.466e-07	-4.607e-07	-4.524e-07	-4.743e-07	-4.914e-07	-5.102e-07	-5.212e-07	-5.143e-07	-4.607e-07	-4.743e-07		-1.4347e-06	-1.447e-06	-1.4261e-06	-1.4253e-06	-1.4284e-06	-1.4293e-06	-1.4279e-06	-1.4385e-06	-1.461e-06	-1.4761e-06		-2.5135e-06	-2.5989e-06	-2.6803e-06	-2.7449e-06	-2.961e-06	-4.222e-06	-4.119e-06	-4.073e-06	-4.099e-06	-4.113e-06			-1.8997e-06	-1.8454e-06	-1.805e-06	-1.7659e-06	-1.759e-06	-1.7231e-06	-1.7003e-06	-1.6742e-06	-1.679e-06	-1.6553e-06		-1.1197e-06	-1.1044e-06	-1.1245e-06
0.3577		-4.9e-07	-4.962e-07	-5.08e-07	-5.067e-07	-5.21e-07	-5.492e-07	-5.664e-07	-5.739e-07	-4.962e-07	-5.067e-07		-1.4888e-06	-1.5035e-06	-1.4875e-06	-1.4797e-06	-1.4861e-06	-1.4868e-06	-1.4917e-06	-1.4926e-06	-1.5251e-06	-1.5397e-06		-2.6601e-06	-2.7514e-06	-2.723e-06	-2.826e-06	-3.171e-06	-4.4e-06	-4.341e-06	-4.379e-06	-4.351e-06	-4.38e-06			-2.0066e-06	-1.9439e-06	-1.9097e-06	-1.8672e-06	-1.8572e-06	-1.8265e-06	-1.7967e-06	-1.7738e-06	-1.7804e-06	-1.7504e-06		-1.1773e-06	-1.1588e-06	-1.181e-06
0.3543		-5.246e-07	-5.244e-07	-5.369e-07	-5.511e-07	-5.6e-07	-5.95e-07	-6.088e-07	-6.177e-07	-5.244e-07	-5.511e-07		-1.5478e-06	-1.5552e-06	-1.5437e-06	-1.5385e-06	-1.5443e-06	-1.5504e-06	-1.5516e-06	-1.552e-06	-1.577e-06	-1.6003e-06		-2.791e-06	-2.788e-06	-2.854e-06	-2.954e-06	-3.343e-06	-4.662e-06	-4.609e-06	-4.566e-06	-4.539e-06	-4.605e-06			-2.1056e-06	-2.0505e-06	-2.0108e-06	-1.9603e-06	-1.9575e-06	-1.93e-06	-1.9015e-06	-1.8729e-06	-1.8734e-06	-1.8523e-06		-1.2281e-06	-1.2185e-06	-1.2357e-06
0.3492		-5.613e-07	-5.753e-07	-5.753e-07	-6.064e-07	-6.238e-07	-6.498e-07	-6.576e-07	-6.517e-07	-5.753e-07	-6.064e-07		-1.6029e-06	-1.6151e-06	-1.5973e-06	-1.6025e-06	-1.6065e-06	-1.6069e-06	-1.6085e-06	-1.6197e-06	-1.6431e-06	-1.6601e-06		-2.801e-06	-2.892e-06	-3.069e-06	-3.091e-06	-3.507e-06	-4.909e-06	-4.823e-06	-4.783e-06	-4.801e-06	-4.828e-06			-2.1993e-06	-2.1451e-06	-2.1104e-06	-2.0665e-06	-2.0667e-06	-2.03e-06	-2.008e-06	-1.9798e-06	-1.9858e-06	-1.9583e-06		-1.2755e-06	-1.2701e-06	-1.2964e-06
0.3455		-6.048e-07	-6.197e-07	-6.256e-07	-6.426e-07	-6.6e-07	-6.913e-07	-7.157e-07	-7.159e-07	-6.197e-07	-6.426e-07		-1.6603e-06	-1.6759e-06	-1.6657e-06	-1.6601e-06	-1.6627e-06	-1.6691e-06	-1.6763e-06	-1.6785e-06	-1.7078e-06	-1.7321e-06		-3.016e-06	-3.119e-06	-3.181e-06	-3.266e-06	-3.71e-06	-5.099e-06	-5.049e-06	-5.084e-06	-5.059e-06	-5.086e-06			-2.3075e-06	-2.2473e-06	-2.2162e-06	-2.1692e-06	-2.1668e-06	-2.1377e-06	-2.1123e-06	-2.0862e-06	-2.0891e-06	-2.0659e-06		-1.3273e-06	-1.3189e-06	-1.3466e-06
0.3361		-6.455e-07	-6.533e-07	-6.736e-07	-6.901e-07	-7.083e-07	-7.415e-07	-7.597e-07	-7.666e-07	-6.533e-07	-6.901e-07		-1.7193e-06	-1.7267e-06	-1.7203e-06	-1.7181e-06	-1.7248e-06	-1.7353e-06	-1.7378e-06	-1.7411e-06	-1.7651e-06	-1.793e-06		-3.103e-06	-3.231e-06	-3.311e-06	-3.441e-06	-3.898e-06	-5.357e-06	-5.299e-06	-5.28e-06	-5.251e-06	-5.325e-06			-2.4014e-06	-2.3539e-06	-2.3101e-06	-2.2655e-06	-2.2702e-06	-2.2395e-06	-2.2171e-06	-2.1859e-06	-2.1933e-06	-2.1727e-06		-1.3721e-06	-1.3718e-06	-1.3935e-06
0.3304		-6.863e-07	-7.042e-07	-7.17e-07	-7.425e-07	-7.706e-07	-8.079e-07	-8.16e-07	-8.059e-07	-7.042e-07	-7.425e-07		-1.7687e-06	-1.7859e-06	-1.7733e-06	-1.7804e-06	-1.7913e-06	-1.7904e-06	-1.7937e-06	-1.8059e-06	-1.8369e-06	-1.8503e-06		-3.218e-06	-3.352e-06	-3.514e-06	-3.589e-06	-4.049e-06	-5.564e-06	-5.494e-06	-5.5e-06	-5.507e-06	-5.562e-06			-2.4893e-06	-2.4427e-06	-2.4096e-06	-2.3779e-06	-2.3748e-06	-2.3396e-06	-2.3201e-06	-2.2938e-06	-2.2995e-06	-2.2761e-06		-1.4122e-06	-1.4192e-06	-1.4455e-06
0.3261		-7.296e-07	-7.592e-07	-7.674e-07	-7.91e-07	-8.159e-07	-8.522e-07	-8.827e-07	-8.752e-07	-7.592e-07	-7.91e-07		-1.8192e-06	-1.8388e-06	-1.8343e-06	-1.8354e-06	-1.8417e-06	-1.8518e-06	-1.8594e-06	-1.8647e-06	-1.8931e-06	-1.9172e-06		-3.451e-06	-3.588e-06	-3.667e-06	-3.774e-06	-4.274e-06	-5.796e-06	-5.745e-06	-5.801e-06	-5.791e-06	-5.82e-06			-2.5819e-06	-2.5341e-06	-2.5057e-06	-2.4691e-06	-2.4718e-06	-2.4404e-06	-2.4167e-06	-2.3951e-06	-2.3968e-06	-2.3724e-06		-1.4573e-06	-1.4602e-06	-1.4878e-06
0.3181		-7.829e-07	-7.973e-07	-8.257e-07	-8.463e-07	-8.626e-07	-9.098e-07	-9.28e-07	-9.341e-07	-7.973e-07	-8.463e-07		-1.8743e-06	-1.8919e-06	-1.8903e-06	-1.8932e-06	-1.9001e-06	-1.9153e-06	-1.9204e-06	-1.9279e-06	-1.9531e-06	-1.9819e-06		-3.556e-06	-3.71e-06	-3.813e-06	-3.949e-06	-4.461e-06	-6.066e-06	-6.016e-06	-6.009e-06	-5.991e-06	-6.08e-06			-2.6656e-06	-2.622e-06	-2.5914e-06	-2.5545e-06	-2.5665e-06	-2.5338e-06	-2.5154e-06	-2.4909e-06	-2.4987e-06	-2.4784e-06		-1.4994e-06	-1.5097e-06	-1.5397e-06
0.3128		-8.251e-07	-8.47e-07	-8.665e-07	-8.913e-07	-9.214e-07	-9.684e-07	-9.815e-07	-9.83e-07	-8.47e-07	-8.913e-07		-1.9162e-06	-1.9435e-06	-1.9382e-06	-1.947e-06	-1.9577e-06	-1.9651e-06	-1.9703e-06	-1.9834e-06	-2.0113e-06	-2.035e-06		-3.683e-06	-3.85e-06	-4.003e-06	-4.105e-06	-4.591e-06	-6.265e-06	-6.198e-06	-6.225e-06	-6.261e-06	-6.337e-06			-2.603e-06	-2.6937e-06	-2.6695e-06	-2.6387e-06	-2.6525e-06	-2.6195e-06	-2.6077e-06	-2.5833e-06	-2.5871e-06	-2.5728e-06		-1.5353e-06	-1.5517e-06	-1.5842e-06
0.3069		-8.605e-07	-9.036e-07	-9.159e-07	-9.461e-07	-9.738e-07	-1.0126e-06	-1.0407e-06	-1.039e-06	-9.036e-07	-9.461e-07		-1.9607e-06	-1.9859e-06	-1.9884e-06	-1.9908e-06	-2.0015e-06	-2.0167e-06	-2.0249e-06	-2.0361e-06	-2.0629e-06	-2.0917e-06		-3.913e-06	-4.079e-06	-4.159e-06	-4.3e-06	-4.843e-06	-6.472e-06	-6.45e-06	-6.494e-06	-6.526e-06	-6.582e-06			-2.695e-06	-2.646e-06	-2.668e-06	-2.7097e-06	-2.7237e-06	-2.6969e-06	-2.6755e-06	-2.6603e-06	-2.6671e-06	-2.6497e-06		-1.5721e-06	-1.5898e-06	-1.6196e-06
0.3004		-9.123e-07	-9.34e-07	-9.687e-07	-9.889e-07	-1.0143e-06	-1.066e-06	-1.086e-06	-1.0937e-06	-9.34e-07	-9.889e-07		-2.0044e-06	-2.0269e-06	-2.0319e-06	-2.0372e-06	-2.0513e-06	-2.0681e-06	-2.0757e-06	-2.0844e-06	-2.1126e-06	-2.1409e-06		-4.007e-06	-4.175e-06	-4.319e-06	-4.471e-06	-5.028e-06	-6.716e-06	-6.708e-06	-6.709e-06	-6.708e-06	-6.816e-06			-2.757e-06	-2.727e-06	-2.675e-06	-2.659e-06	-2.685e-06	-2.68e-06	-2.631e-06	-2.7323e-06	-2.631e-06	-2.7257e-06		-1.6099e-06	-1.6343e-06	-1.6625e-06
0.295		-9.443e-07	-9.821e-07	-1.0051e-06	-1.0279e-06	-1.0637e-06	-1.1038e-06	-1.1319e-06	-1.1388e-06	-9.821e-07	-1.0279e-06		-2.0393e-06	-2.0693e-06	-2.0711e-06	-2.0855e-06	-2.1001e-06	-2.1101e-06	-2.1177e-06	-2.1341e-06	-2.162e-06	-2.1837e-06		-4.133e-06	-4.312e-06	-4.484e-06	-4.613e-06	-5.132e-06	-6.897e-06	-6.861e-06	-6.925e-06	-6.969e-06	-7.033e-06			-2.755e-06	-2.753e-06	-2.735e-06	-2.729e-06	-2.758e-06	-2.725e-06	-2.736e-06	-2.72e-06	-2.703e-06	-2.725e-06		-1.6421e-06	-1.6717e-06	-1.7083e-06
0.2888		-9.757e-07	-1.0294e-06	-1.0468e-06	-1.0837e-06	-1.1112e-06	-1.1564e-06	-1.175e-06	-1.1805e-06	-1.0294e-06	-1.0837e-06		-2.0797e-06	-2.1083e-06	-2.1158e-06	-2.1227e-06	-2.1376e-06	-2.1545e-06	-2.1639e-06	-2.1775e-06	-2.2058e-06	-2.2342e-06		-4.313e-06	-4.495e-06	-4.642e-06	-4.797e-06	-5.389e-06	-7.077e-06	-7.101e-06	-7.147e-06	-7.218e-06	-7.297e-06			-2.807e-06	-2.785e-06	-2.81e-06	-2.794e-06	-2.799e-06	-2.789e-06	-2.749e-06	-2.762e-06	-2.763e-06	-2.735e-06		-1.6821e-06	-1.7104e-06	-1.7491e-06
0.2791		-1.0154e-06	-1.0523e-06	-1.0919e-06	-1.1139e-06	-1.1435e-06	-1.192e-06	-1.22e-06	-1.2319e-06	-1.0523e-06	-1.1139e-06		-2.1194e-06	-2.1441e-06	-2.1551e-06	-2.1628e-06	-2.1769e-06	-2.1997e-06	-2.2075e-06	-2.2195e-06	-2.2463e-06	-2.2788e-06		-4.396e-06	-4.596e-06	-4.759e-06	-4.926e-06	-5.553e-06	-7.282e-06	-7.322e-06	-7.356e-06	-7.387e-06	-7.545e-06			-2.861e-06	-2.834e-06	-2.799e-06	-2.78e-06	-2.799e-06	-2.827e-06	-2.785e-06	-2.793e-06	-2.786e-06	-2.783e-06		-1.7182e-06	-1.7531e-06	-1.7898e-06
0.2772		-1.0414e-06	-1.0818e-06	-1.1133e-06	-1.1408e-06	-1.1784e-06	-1.2213e-06	-1.2549e-06	-1.2609e-06	-1.0818e-06	-1.1408e-06		-2.152e-06	-2.1823e-06	-2.1856e-06	-2.2052e-06	-2.2213e-06	-2.2333e-06	-2.2432e-06	-2.2643e-06	-2.2895e-06	-2.3133e-06		-4.48e-06	-4.701e-06	-4.911e-06	-5.054e-06	-5.646e-06	-7.41e-06	-7.458e-06	-7.527e-06	-7.62e-06	-7.687e-06			-2.825e-06	-2.847e-06	-2.848e-06	-2.839e-06	-2.884e-06	-2.82e-06	-2.877e-06	-2.855e-06	-2.857e-06	-2.871e-06		-1.7492e-06	-1.7925e-06	-1.8338e-06
0.2709		-1.0636e-06	-1.1202e-06	-1.1439e-06	-1.1798e-06	-1.2196e-06	-1.2629e-06	-1.2796e-06	-1.2916e-06	-1.1202e-06	-1.1798e-06		-2.1847e-06	-2.2169e-06	-2.2246e-06	-2.237e-06	-2.2593e-06	-2.2715e-06	-2.2851e-06	-2.3018e-06	-2.3326e-06	-2.3561e-06		-4.599e-06	-4.821e-06	-5.019e-06	-5.21e-06	-5.859e-06	-7.525e-06	-7.63e-06	-7.721e-06	-7.813e-06	-7.924e-06			-2.864e-06	-2.843e-06	-2.898e-06	-2.891e-06	-2.899e-06	-2.895e-06	-2.861e-06	-2.884e-06	-2.89e-06	-2.873e-06		-1.789e-06	-1.8291e-06	-1.8719e-06
0.2622		-1.0817e-06	-1.1357e-06	-1.175e-06	-1.204e-06	-1.2367e-06	-1.2854e-06	-1.3196e-06	-1.3406e-06	-1.1357e-06	-1.204e-06		-2.2203e-06	-2.2486e-06	-2.2601e-06	-2.2726e-06	-2.2927e-06	-2.3134e-06	-2.3249e-06	-2.3366e-06	-2.3655e-06	-2.3942e-06		-4.673e-06	-4.916e-06	-5.117e-06	-5.273e-06	-5.979e-06	-7.667e-06	-7.806e-06	-7.881e-06	-7.946e-06	-8.052e-06			-2.896e-06	-2.889e-06	-2.863e-06	-2.85e-06	-2.867e-06	-2.915e-06	-2.871e-06	-2.874e-06	-2.877e-06	-2.886e-06		-1.8247e-06	-1.8727e-06	-1.9146e-06
0.258		-1.1113e-06	-1.1595e-06	-1.1937e-06	-1.2249e-06	-1.2651e-06	-1.3073e-06	-1.3445e-06	-1.353e-06	-1.1595e-06	-1.2249e-06		-2.2532e-06	-2.2886e-06	-2.2959e-06	-2.3167e-06	-2.3387e-06	-2.3492e-06	-2.3609e-06	-2.3821e-06	-2.4074e-06	-2.4305e-06		-4.725e-06	-4.993e-06	-5.235e-06	-5.397e-06	-6.049e-06	-7.773e-06	-7.884e-06	-8.004e-06	-8.119e-06	-8.23e-06			-2.849e-06	-2.898e-06	-2.9e-06	-2.893e-06	-2.958e-06	-2.884e-06	-2.96e-06	-2.943e-06	-2.955e-06	-2.977e-06		-1.8581e-06	-1.9145e-06	-1.9669e-06
0.2524		-1.1243e-06	-1.1791e-06	-1.2109e-06	-1.2549e-06	-1.2945e-06	-1.3419e-06	-1.3592e-06	-1.3768e-06	-1.1791e-06	-1.2549e-06		-2.2825e-06	-2.3206e-06	-2.3335e-06	-2.3462e-06	-2.3675e-06	-2.3823e-06	-2.3993e-06	-2.4147e-06	-2.4411e-06	-2.4697e-06		-4.791e-06	-5.056e-06	-5.297e-06	-5.507e-06	-6.21e-06	-7.783e-06	-7.999e-06	-8.153e-06	-8.247e-06	-8.45e-06			-2.878e-06	-2.871e-06	-2.923e-06	-2.938e-06	-2.947e-06	-2.958e-06	-2.93e-06	-2.953e-06	-2.959e-06	-2.955e-06		-1.8967e-06	-1.9486e-06	-1.9988e-06
0.2496		-1.1321e-06	-1.1912e-06	-1.2245e-06	-1.2684e-06	-1.3034e-06	-1.3519e-06	-1.3887e-06	-1.4088e-06	-1.1912e-06	-1.2684e-06		-2.3203e-06	-2.3483e-06	-2.3663e-06	-2.3821e-06	-2.4015e-06	-2.4228e-06	-2.4361e-06	-2.449e-06	-2.4713e-06	-2.5028e-06		-4.839e-06	-5.107e-06	-5.334e-06	-5.509e-06	-6.281e-06	-7.891e-06	-8.105e-06	-8.233e-06	-8.339e-06	-8.466e-06			-2.9e-06	-2.905e-06	-2.883e-06	-2.878e-06	-2.904e-06	-2.956e-06	-2.927e-06	-2.918e-06	-2.92e-06	-2.953e-06		-1.931e-06	-1.9899e-06	-2.0387e-06
0.2411		-1.1587e-06	-1.2033e-06	-1.2434e-06	-1.2772e-06	-1.3169e-06	-1.3671e-06	-1.4007e-06	-1.4161e-06	-1.2033e-06	-1.2772e-06		-2.3478e-06	-2.3831e-06	-2.3945e-06	-2.4174e-06	-2.4403e-06	-2.4524e-06	-2.464e-06	-2.4879e-06	-2.5135e-06	-2.5308e-06		-4.834e-06	-5.132e-06	-5.402e-06	-5.596e-06	-6.296e-06	-7.905e-06	-8.133e-06	-8.284e-06	-8.458e-06	-8.595e-06			-2.831e-06	-2.882e-06	-2.904e-06	-2.923e-06	-2.986e-06	-2.912e-06	-2.999e-06	-2.989e-06	-2.986e-06	-3.029e-06		-1.9567e-06	-2.0283e-06	-2.0801e-06
0.23399		-1.1631e-06	-1.2163e-06	-1.2563e-06	-1.2936e-06	-1.3362e-06	-1.3899e-06	-1.4101e-06	-1.4361e-06	-1.2163e-06	-1.2936e-06		-2.3788e-06	-2.4156e-06	-2.4307e-06	-2.4464e-06	-2.4683e-06	-2.4852e-06	-2.5025e-06	-2.5185e-06	-2.5449e-06	-2.5671e-06		-4.874e-06	-5.177e-06	-5.403e-06	-5.659e-06	-6.399e-06	-7.851e-06	-8.147e-06	-8.381e-06	-8.5e-06	-8.695e-06			-2.859e-06	-2.866e-06	-2.919e-06	-2.941e-06	-2.967e-06	-2.974e-06	-2.943e-06	-2.985e-06	-2.993e-06	-2.988e-06		-1.997e-06	-2.059e-06	-2.1139e-06
0.22915		-1.1666e-06	-1.2305e-06	-1.263e-06	-1.3172e-06	-1.3511e-06	-1.4032e-06	-1.4361e-06	-1.45e-06	-1.2305e-06	-1.3172e-06		-2.4197e-06	-2.4425e-06	-2.4666e-06	-2.4832e-06	-2.5003e-06	-2.5244e-06	-2.5385e-06	-2.5526e-06	-2.5732e-06	-2.6036e-06		-4.886e-06	-5.178e-06	-5.417e-06	-5.622e-06	-6.429e-06	-7.91e-06	-8.225e-06	-8.385e-06	-8.534e-06	-8.703e-06			-2.862e-06	-2.889e-06	-2.871e-06	-2.883e-06	-2.907e-06	-2.965e-06	-2.94e-06	-2.928e-06	-2.945e-06	-2.977e-06		-2.0256e-06	-2.0994e-06	-2.1524e-06
0.22184		-1.1937e-06	-1.2387e-06	-1.2813e-06	-1.3159e-06	-1.3602e-06	-1.4087e-06	-1.4461e-06	-1.4641e-06	-1.2387e-06	-1.3159e-06		-2.4485e-06	-2.4803e-06	-2.4969e-06	-2.5169e-06	-2.5385e-06	-2.5545e-06	-2.5681e-06	-2.5901e-06	-2.6129e-06	-2.6352e-06		-4.865e-06	-5.161e-06	-5.458e-06	-5.664e-06	-6.391e-06	-7.883e-06	-8.183e-06	-8.387e-06	-8.608e-06	-8.8e-06			-2.812e-06	-2.842e-06	-2.854e-06	-2.907e-06	-2.984e-06	-2.915e-06	-2.994e-06	-3.003e-06	-3.007e-06	-3.049e-06		-2.0511e-06	-2.1325e-06	-2.19e-06
0.21612		-1.1963e-06	-1.2453e-06	-1.2898e-06	-1.3239e-06	-1.3692e-06	-1.4194e-06	-1.4498e-06	-1.4765e-06	-1.2453e-06	-1.3239e-06		-2.478e-06	-2.5107e-06	-2.5302e-06	-2.5445e-06	-2.5664e-06	-2.5851e-06	-2.6033e-06	-2.6185e-06	-2.6443e-06	-2.6677e-06		-4.873e-06	-5.179e-06	-5.387e-06	-5.695e-06	-6.409e-06	-7.769e-06	-8.146e-06	-8.414e-06	-8.582e-06	-8.795e-06			-2.827e-06	-2.845e-06	-2.906e-06	-2.913e-06	-2.963e-06	-2.972e-06	-2.943e-06	-2.991e-06	-3.006e-06	-2.996e-06		-2.0821e-06	-2.1566e-06	-2.2166e-06
0.2102		-1.1969e-06	-1.2606e-06	-1.2944e-06	-1.3444e-06	-1.3869e-06	-1.4405e-06	-1.4665e-06	-1.4793e-06	-1.2606e-06	-1.3444e-06		-2.5148e-06	-2.5344e-06	-2.5627e-06	-2.5753e-06	-2.5988e-06	-2.622e-06	-2.6347e-06	-2.6513e-06	-2.6741e-06	-2.651e-06		-4.846e-06	-5.154e-06	-5.391e-06	-5.62e-06	-6.434e-06	-7.776e-06	-8.164e-06	-8.336e-06	-8.559e-06	-8.755e-06			-2.812e-06	-2.86e-06	-2.881e-06	-2.871e-06	-2.899e-06	-2.954e-06	-2.925e-06	-2.942e-06	-2.945e-06	-2.982e-06		-2.1036e-06	-2.1947e-06	-2.2451e-06
0.20397		-1.225e-06	-1.2717e-06	-1.3175e-06	-1.347e-06	-1.3971e-06	-1.4426e-06	-1.4851e-06	-1.5081e-06	-1.2717e-06	-1.347e-06		-2.5429e-06	-2.5756e-06	-2.5919e-06	-2.6157e-06	-2.6377e-06	-2.6539e-06	-2.6697e-06	-2.6923e-06	-2.65e-06	-2.626e-06		-4.801e-06	-5.103e-06	-5.411e-06	-5.62e-06	-6.364e-06	-7.699e-06	-8.079e-06	-8.325e-06	-8.571e-06	-8.757e-06			-2.789e-06	-2.819e-06	-2.836e-06	-2.901e-06	-2.959e-06	-2.912e-06	-2.973e-06	-3.013e-06	-3.026e-06	-3.041e-06		-2.1273e-06	-2.2219e-06	-2.2825e-06
0.198		-1.2293e-06	-1.2773e-06	-1.3217e-06	-1.3567e-06	-1.3993e-06	-1.4514e-06	-1.4846e-06	-1.5113e-06	-1.2773e-06	-1.3567e-06		-2.5663e-06	-2.6009e-06	-2.6211e-06	-2.6404e-06	-2.6627e-06	-2.6809e-06	-2.634e-06	-2.627e-06	-2.673e-06	-2.686e-06		-4.799e-06	-5.099e-06	-5.309e-06	-5.613e-06	-6.341e-06	-7.549e-06	-7.969e-06	-8.292e-06	-8.509e-06	-8.73e-06			-2.8e-06	-2.817e-06	-2.894e-06	-2.883e-06	-2.938e-06	-2.97e-06	-2.94e-06	-2.981e-06	-3.002e-06	-2.998e-06		-2.1503e-06	-2.2393e-06	-2.3027e-06
0.19107		-1.2265e-06	-1.2927e-06	-1.3204e-06	-1.3797e-06	-1.4199e-06	-1.473e-06	-1.4924e-06	-1.518e-06	-1.2927e-06	-1.3797e-06		-2.5933e-06	-2.6201e-06	-2.6515e-06	-2.6621e-06	-2.597e-06	-2.67e-06	-2.663e-06	-2.659e-06	-2.647e-06	-2.737e-06		-4.743e-06	-5.026e-06	-5.304e-06	-5.527e-06	-6.324e-06	-7.517e-06	-7.961e-06	-8.15e-06	-8.425e-06	-8.66e-06			-2.78e-06	-2.832e-06	-2.836e-06	-2.849e-06	-2.869e-06	-2.941e-06	-2.915e-06	-2.931e-06	-2.935e-06	-2.983e-06		-2.1654e-06	-2.2618e-06	-2.3177e-06
0.18127		-1.2479e-06	-1.2983e-06	-1.3431e-06	-1.3779e-06	-1.4233e-06	-1.4691e-06	-1.5124e-06	-1.536e-06	-1.2983e-06	-1.3779e-06		-2.6101e-06	-2.6482e-06	-2.6681e-06	-2.6937e-06	-2.65e-06	-2.648e-06	-2.645e-06	-2.71e-06	-2.732e-06	-2.701e-06		-4.675e-06	-4.966e-06	-5.28e-06	-5.48e-06	-6.209e-06	-7.403e-06	-7.851e-06	-8.103e-06	-8.377e-06	-8.551e-06			-2.737e-06	-2.775e-06	-2.81e-06	-2.861e-06	-2.903e-06	-2.879e-06	-2.932e-06	-2.981e-06	-2.988e-06	-3.007e-06		-2.1722e-06	-2.2785e-06	-2.3387e-06
0.17965		-1.2539e-06	-1.3031e-06	-1.3507e-06	-1.381e-06	-1.4252e-06	-1.4785e-06	-1.5121e-06	-1.5347e-06	-1.3031e-06	-1.381e-06		-2.626e-06	-2.6665e-06	-2.625e-06	-2.627e-06	-2.653e-06	-2.654e-06	-2.7e-06	-2.698e-06	-2.748e-06	-2.755e-06		-4.653e-06	-4.948e-06	-5.173e-06	-5.461e-06	-6.178e-06	-7.229e-06	-7.691e-06	-8.023e-06	-8.273e-06	-8.508e-06			-2.758e-06	-2.785e-06	-2.874e-06	-2.851e-06	-2.905e-06	-2.922e-06	-2.913e-06	-2.955e-06	-2.97e-06	-2.974e-06		-2.1835e-06	-2.2873e-06	-2.3462e-06
0.17434		-1.2549e-06	-1.3147e-06	-1.3462e-06	-1.4076e-06	-1.4455e-06	-1.4924e-06	-1.5189e-06	-1.5451e-06	-1.3147e-06	-1.4076e-06		-2.6433e-06	-2.575e-06	-2.635e-06	-2.623e-06	-2.653e-06	-2.706e-06	-2.72e-06	-2.729e-06	-2.716e-06	-2.781e-06		-4.553e-06	-4.83e-06	-5.128e-06	-5.342e-06	-6.137e-06	-7.164e-06	-7.636e-06	-7.849e-06	-8.118e-06	-8.363e-06			-2.731e-06	-2.794e-06	-2.79e-06	-2.81e-06	-2.839e-06	-2.902e-06	-2.874e-06	-2.898e-06	-2.915e-06	-2.931e-06		-2.191e-06	-2.2995e-06	-2.3547e-06
0.16751		-1.2651e-06	-1.3233e-06	-1.3635e-06	-1.4033e-06	-1.4494e-06	-1.4948e-06	-1.5369e-06	-1.5563e-06	-1.3233e-06	-1.4033e-06		-2.6541e-06	-2.638e-06	-2.611e-06	-2.69e-06	-2.707e-06	-2.697e-06	-2.704e-06	-2.768e-06	-2.789e-06	-2.754e-06		-4.516e-06	-4.795e-06	-5.081e-06	-5.252e-06	-6e-06	-7.025e-06	-7.461e-06	-7.759e-06	-8.063e-06	-8.215e-06			-2.692e-06	-2.733e-06	-2.763e-06	-2.82e-06	-2.838e-06	-2.831e-06	-2.898e-06	-2.922e-06	-2.923e-06	-2.955e-06		-2.1929e-06	-2.3054e-06	-2.3705e-06
0.16142		-1.2787e-06	-1.3255e-06	-1.3723e-06	-1.4046e-06	-1.4501e-06	-1.4957e-06	-1.5317e-06	-1.5605e-06	-1.3255e-06	-1.4046e-06		-2.6601e-06	-2.633e-06	-2.654e-06	-2.661e-06	-2.702e-06	-2.7e-06	-2.761e-06	-2.747e-06	-2.791e-06	-2.804e-06		-4.48e-06	-4.755e-06	-4.981e-06	-5.244e-06	-5.934e-06	-6.839e-06	-7.307e-06	-7.652e-06	-7.913e-06	-8.167e-06			-2.697e-06	-2.733e-06	-2.814e-06	-2.798e-06	-2.85e-06	-2.85e-06	-2.861e-06	-2.904e-06	-2.909e-06	-2.924e-06		-2.1988e-06	-2.3026e-06	-2.3641e-06
0.15607		-1.2741e-06	-1.3285e-06	-1.3696e-06	-1.4245e-06	-1.4679e-06	-1.5123e-06	-1.5291e-06	-1.5609e-06	-1.3285e-06	-1.4245e-06		-2.6667e-06	-2.587e-06	-2.647e-06	-2.653e-06	-2.688e-06	-2.734e-06	-2.756e-06	-2.748e-06	-2.754e-06	-2.806e-06		-4.347e-06	-4.617e-06	-4.915e-06	-5.121e-06	-5.876e-06	-6.717e-06	-7.274e-06	-7.473e-06	-7.711e-06	-7.982e-06			-2.666e-06	-2.729e-06	-2.727e-06	-2.744e-06	-2.765e-06	-2.837e-06	-2.816e-06	-2.826e-06	-2.836e-06	-2.872e-06		-2.2005e-06	-2.3075e-06	-2.3641e-06
0.15299		-1.2831e-06	-1.3434e-06	-1.3743e-06	-1.4197e-06	-1.4681e-06	-1.509e-06	-1.5501e-06	-1.5611e-06	-1.3434e-06	-1.4197e-06		-2.579e-06	-2.625e-06	-2.623e-06	-2.719e-06	-2.729e-06	-2.72e-06	-2.739e-06	-2.795e-06	-2.792e-06	-2.78e-06		-4.313e-06	-4.579e-06	-4.861e-06	-5e-06	-5.715e-06	-6.59e-06	-7.045e-06	-7.335e-06	-7.639e-06	-7.802e-06			-2.618e-06	-2.654e-06	-2.701e-06	-2.743e-06	-2.77e-06	-2.761e-06	-2.826e-06	-2.834e-06	-2.827e-06	-2.879e-06		-2.1942e-06	-2.3082e-06	-2.3683e-06
0.14376		-1.2977e-06	-1.3425e-06	-1.3893e-06	-1.4153e-06	-1.4609e-06	-1.5038e-06	-1.5455e-06	-1.5734e-06	-1.3425e-06	-1.4153e-06		-2.561e-06	-2.629e-06	-2.658e-06	-2.671e-06	-2.696e-06	-2.713e-06	-2.762e-06	-2.763e-06	-2.806e-06	-2.818e-06		-4.291e-06	-4.545e-06	-4.747e-06	-5.006e-06	-5.66e-06	-6.392e-06	-6.886e-06	-7.222e-06	-7.482e-06	-7.733e-06			-2.61e-06	-2.635e-06	-2.7e-06	-2.718e-06	-2.781e-06	-2.761e-06	-2.792e-06	-2.825e-06	-2.851e-06	-2.849e-06		-2.1999e-06	-2.3056e-06	-2.3657e-06
0.13776		-1.2887e-06	-1.3407e-06	-1.381e-06	-1.4263e-06	-1.4637e-06	-1.5181e-06	-1.5366e-06	-1.5601e-06	-1.3407e-06	-1.4263e-06		-2.585e-06	-2.571e-06	-2.647e-06	-2.652e-06	-2.682e-06	-2.737e-06	-2.757e-06	-2.733e-06	-2.751e-06	-2.806e-06		-4.153e-06	-4.409e-06	-4.645e-06	-4.861e-06	-5.551e-06	-6.249e-06	-6.745e-06	-7.014e-06	-7.297e-06	-7.529e-06			-2.566e-06	-2.634e-06	-2.643e-06	-2.663e-06	-2.681e-06	-2.75e-06	-2.73e-06	-2.733e-06	-2.75e-06	-2.794e-06		-2.1963e-06	-2.3026e-06	-2.361e-06
0.13263		-1.2942e-06	-1.3523e-06	-1.3773e-06	-1.4266e-06	-1.469e-06	-1.5085e-06	-1.5505e-06	-1.5553e-06	-1.3523e-06	-1.4266e-06		-2.547e-06	-2.581e-06	-2.607e-06	-2.698e-06	-2.713e-06	-2.713e-06	-2.717e-06	-2.781e-06	-2.771e-06	-2.771e-06		-4.111e-06	-4.351e-06	-4.609e-06	-4.743e-06	-5.406e-06	-6.139e-06	-6.578e-06	-6.859e-06	-7.16e-06	-7.346e-06			-2.493e-06	-2.552e-06	-2.588e-06	-2.653e-06	-2.675e-06	-2.669e-06	-2.723e-06	-2.734e-06	-2.732e-06	-2.78e-06		-2.1874e-06	-2.3013e-06	-2.3541e-06
0.12552		-1.3051e-06	-1.3458e-06	-1.3915e-06	-1.4157e-06	-1.4575e-06	-1.4995e-06	-1.5346e-06	-1.561e-06	-1.3458e-06	-1.4157e-06		-2.513e-06	-2.591e-06	-2.627e-06	-2.637e-06	-2.651e-06	-2.686e-06	-2.727e-06	-2.738e-06	-2.781e-06	-2.788e-06		-4.055e-06	-4.297e-06	-4.481e-06	-4.726e-06	-5.323e-06	-5.928e-06	-6.455e-06	-6.737e-06	-6.989e-06	-7.226e-06			-2.504e-06	-2.501e-06	-2.579e-06	-2.617e-06	-2.68e-06	-2.649e-06	-2.661e-06	-2.715e-06	-2.727e-06	-2.748e-06		-2.1873e-06	-2.2915e-06	-2.3455e-06
0.11952		-1.2909e-06	-1.3353e-06	-1.3792e-06	-1.4165e-06	-1.4541e-06	-1.5008e-06	-1.5215e-06	-1.5476e-06	-1.3353e-06	-1.4165e-06		-2.537e-06	-2.527e-06	-2.612e-06	-2.612e-06	-2.644e-06	-2.708e-06	-2.72e-06	-2.7e-06	-2.718e-06	-2.775e-06		-3.935e-06	-4.165e-06	-4.347e-06	-4.582e-06	-5.193e-06	-5.789e-06	-6.263e-06	-6.524e-06	-6.766e-06	-7.015e-06			-2.46e-06	-2.53e-06	-2.534e-06	-2.534e-06	-2.566e-06	-2.654e-06	-2.625e-06	-2.637e-06	-2.627e-06	-2.681e-06		-2.1865e-06	-2.2919e-06	-2.3372e-06
0.11335		-1.2915e-06	-1.3477e-06	-1.3686e-06	-1.4135e-06	-1.4559e-06	-1.4908e-06	-1.525e-06	-1.5337e-06	-1.3477e-06	-1.4135e-06		-2.504e-06	-2.532e-06	-2.568e-06	-2.624e-06	-2.66e-06	-2.674e-06	-2.647e-06	-2.737e-06	-2.726e-06	-2.731e-06		-3.874e-06	-4.1e-06	-4.337e-06	-4.463e-06	-5.066e-06	-5.671e-06	-6.09e-06	-6.329e-06	-6.653e-06	-6.815e-06			-2.363e-06	-2.438e-06	-2.479e-06	-2.54e-06	-2.558e-06	-2.545e-06	-2.604e-06	-2.621e-06	-2.64e-06	-2.671e-06		-2.1724e-06	-2.2825e-06	-2.3321e-06
0.10696		-1.3017e-06	-1.338e-06	-1.3807e-06	-1.4047e-06	-1.4409e-06	-1.4796e-06	-1.5116e-06	-1.5385e-06	-1.338e-06	-1.4047e-06		-2.46e-06	-2.541e-06	-2.573e-06	-2.583e-06	-2.599e-06	-2.631e-06	-2.681e-06	-2.682e-06	-2.732e-06	-2.734e-06		-3.828e-06	-4.041e-06	-4.202e-06	-4.441e-06	-4.978e-06	-5.461e-06	-5.916e-06	-6.233e-06	-6.524e-06	-6.711e-06			-2.4773e-06	-2.394e-06	-2.472e-06	-2.508e-06	-2.543e-06	-2.544e-06	-2.525e-06	-2.618e-06	-2.62e-06	-2.612e-06		-2.1747e-06	-2.2706e-06	-2.3279e-06
0.10203		-1.2861e-06	-1.3246e-06	-1.3652e-06	-1.399e-06	-1.4355e-06	-1.4739e-06	-1.4985e-06	-1.5222e-06	-1.3246e-06	-1.399e-06		-2.478e-06	-2.469e-06	-2.556e-06	-2.553e-06	-2.589e-06	-2.652e-06	-2.667e-06	-2.65e-06	-2.658e-06	-2.717e-06		-3.711e-06	-3.916e-06	-4.079e-06	-4.298e-06	-4.834e-06	-5.351e-06	-5.777e-06	-6.027e-06	-6.249e-06	-6.486e-06			-2.4498e-06	-2.4933e-06	-2.426e-06	-2.409e-06	-2.462e-06	-2.539e-06	-2.502e-06	-2.522e-06	-2.516e-06	-2.568e-06		-2.1744e-06	-2.2689e-06	-2.3202e-06
0.09558		-1.2795e-06	-1.3381e-06	-1.3568e-06	-1.401e-06	-1.441e-06	-1.4717e-06	-1.4954e-06	-1.5099e-06	-1.3381e-06	-1.401e-06		-2.437e-06	-2.482e-06	-2.501e-06	-2.561e-06	-2.603e-06	-2.608e-06	-2.583e-06	-2.687e-06	-2.67e-06	-2.665e-06		-3.649e-06	-3.819e-06	-4.065e-06	-4.189e-06	-4.726e-06	-5.233e-06	-5.64e-06	-5.823e-06	-6.132e-06	-6.296e-06			-2.4151e-06	-2.4639e-06	-2.4896e-06	-2.5219e-06	-2.454e-06	-2.441e-06	-2.509e-06	-2.514e-06	-2.519e-06	-2.566e-06		-2.1689e-06	-2.2667e-06	-2.3177e-06
0.08655		-1.2828e-06	-1.3244e-06	-1.3652e-06	-1.3812e-06	-1.4196e-06	-1.4584e-06	-1.4873e-06	-1.5101e-06	-1.3244e-06	-1.3812e-06		-2.403e-06	-2.489e-06	-2.514e-06	-2.526e-06	-2.543e-06	-2.568e-06	-2.62e-06	-2.62e-06	-2.674e-06	-2.669e-06		-3.596e-06	-3.796e-06	-3.934e-06	-4.142e-06	-4.636e-06	-5.026e-06	-5.451e-06	-5.737e-06	-5.965e-06	-6.162e-06			-2.3898e-06	-2.432e-06	-2.467e-06	-2.498e-06	-2.417e-06	-2.438e-06	-2.415e-06	-2.511e-06	-2.501e-06	-2.489e-06		-2.1705e-06	-2.2587e-06	-2.3103e-06
0.08366		-1.2735e-06	-1.3129e-06	-1.3513e-06	-1.3788e-06	-1.4117e-06	-1.4453e-06	-1.4743e-06	-1.4989e-06	-1.3129e-06	-1.3788e-06		-2.4827e-06	-2.414e-06	-2.499e-06	-2.5e-06	-2.54e-06	-2.59e-06	-2.603e-06	-2.589e-06	-2.595e-06	-2.651e-06		-3.5e-06	-3.679e-06	-3.836e-06	-4.022e-06	-4.528e-06	-4.932e-06	-5.337e-06	-5.547e-06	-5.759e-06	-5.974e-06			-2.3633e-06	-2.4125e-06	-2.4379e-06	-2.4635e-06	-2.4809e-06	-2.427e-06	-2.5183e-06	-2.421e-06	-2.431e-06	-2.463e-06		-2.1744e-06	-2.2639e-06	-2.3085e-06
0.07816		-1.2628e-06	-1.3131e-06	-1.3323e-06	-1.3813e-06	-1.4171e-06	-1.4453e-06	-1.4607e-06	-1.4745e-06	-1.3131e-06	-1.3813e-06		-2.4633e-06	-2.499e-06	-2.424e-06	-2.508e-06	-2.545e-06	-2.525e-06	-2.531e-06	-2.627e-06	-2.608e-06	-2.582e-06		-3.392e-06	-3.557e-06	-3.82e-06	-3.909e-06	-4.402e-06	-4.824e-06	-5.181e-06	-5.362e-06	-5.68e-06	-5.79e-06			-2.3259e-06	-2.3737e-06	-2.4057e-06	-2.4378e-06	-2.4617e-06	-2.4685e-06	-2.496e-06	-2.5129e-06	-2.5158e-06	-2.468e-06		-2.1714e-06	-2.2571e-06	-2.3072e-06
0.07286		-1.2591e-06	-1.3078e-06	-1.338e-06	-1.3622e-06	-1.4001e-06	-1.4295e-06	-1.4565e-06	-1.4779e-06	-1.3078e-06	-1.3622e-06		-2.447e-06	-2.4873e-06	-2.5213e-06	-2.471e-06	-2.487e-06	-2.508e-06	-2.567e-06	-2.554e-06	-2.603e-06	-2.601e-06		-3.396e-06	-3.564e-06	-3.689e-06	-3.847e-06	-4.322e-06	-4.645e-06	-5.019e-06	-5.289e-06	-5.492e-06	-5.651e-06			-2.3041e-06	-2.3462e-06	-2.3793e-06	-2.4103e-06	-2.4285e-06	-2.4498e-06	-2.4626e-06	-2.4892e-06	-2.4876e-06	-2.385e-06		-2.1779e-06	-2.2508e-06	-2.2963e-06
0.06549		-1.2545e-06	-1.2903e-06	-1.3273e-06	-1.3536e-06	-1.3847e-06	-1.4181e-06	-1.4388e-06	-1.4658e-06	-1.2903e-06	-1.3536e-06		-2.4325e-06	-2.464e-06	-2.5057e-06	-2.434e-06	-2.478e-06	-2.524e-06	-2.535e-06	-2.52e-06	-2.526e-06	-2.581e-06		-3.283e-06	-3.443e-06	-3.59e-06	-3.76e-06	-4.207e-06	-4.562e-06	-4.938e-06	-5.109e-06	-5.286e-06	-5.483e-06			-2.275e-06	-2.3289e-06	-2.3504e-06	-2.3732e-06	-2.3998e-06	-2.4194e-06	-2.4297e-06	-2.4547e-06	-2.4598e-06	-2.4793e-06		-2.1777e-06	-2.2489e-06	-2.2889e-06
0.06012		-1.2494e-06	-1.2881e-06	-1.3129e-06	-1.3483e-06	-1.3903e-06	-1.4201e-06	-1.4302e-06	-1.4402e-06	-1.2881e-06	-1.3483e-06		-2.4113e-06	-2.4509e-06	-2.4859e-06	-2.45e-06	-2.482e-06	-2.462e-06	-2.469e-06	-2.542e-06	-2.535e-06	-2.503e-06		-3.181e-06	-3.343e-06	-3.569e-06	-3.654e-06	-4.105e-06	-4.439e-06	-4.762e-06	-4.965e-06	-5.153e-06	-5.321e-06			-2.2481e-06	-2.2942e-06	-2.3273e-06	-2.3593e-06	-2.3753e-06	-2.3931e-06	-2.41e-06	-2.4309e-06	-2.4313e-06	-2.4645e-06		-2.1762e-06	-2.2479e-06	-2.2917e-06
0.05661		-1.2401e-06	-1.2898e-06	-1.3097e-06	-1.338e-06	-1.3743e-06	-1.4022e-06	-1.4312e-06	-1.4468e-06	-1.2898e-06	-1.338e-06		-2.3948e-06	-2.4339e-06	-2.4738e-06	-2.421e-06	-2.427e-06	-2.448e-06	-2.509e-06	-2.491e-06	-2.517e-06	-2.537e-06		-3.199e-06	-3.356e-06	-3.458e-06	-3.586e-06	-4.021e-06	-4.299e-06	-4.641e-06	-4.888e-06	-5.049e-06	-5.184e-06			-2.2315e-06	-2.2692e-06	-2.3037e-06	-2.3289e-06	-2.3494e-06	-2.3683e-06	-2.3765e-06	-2.4044e-06	-2.4083e-06	-2.43e-06		-2.1822e-06	-2.2415e-06	-2.2851e-06
0.04781		-1.2396e-06	-1.2697e-06	-1.3104e-06	-1.3298e-06	-1.3594e-06	-1.3935e-06	-1.4127e-06	-1.4308e-06	-1.2697e-06	-1.3298e-06		-2.3845e-06	-2.4123e-06	-2.4578e-06	-2.4699e-06	-2.4933e-06	-2.467e-06	-2.475e-06	-2.459e-06	-2.459e-06	-2.518e-06		-3.098e-06	-3.248e-06	-3.363e-06	-3.524e-06	-3.941e-06	-4.223e-06	-4.565e-06	-4.715e-06	-4.91e-06	-5.063e-06			-2.2071e-06	-2.2516e-06	-2.2777e-06	-2.3001e-06	-2.3249e-06	-2.3402e-06	-2.3515e-06	-2.3753e-06	-2.3775e-06	-2.4064e-06		-2.1851e-06	-2.2435e-06	-2.2828e-06
0.042		-1.2335e-06	-1.2649e-06	-1.2948e-06	-1.3206e-06	-1.358e-06	-1.3907e-06	-1.4023e-06	-1.415e-06	-1.2649e-06	-1.3206e-06		-2.3649e-06	-2.4013e-06	-2.4379e-06	-2.4625e-06	-2.4869e-06	-2.408e-06	-2.412e-06	-2.474e-06	-2.474e-06	-2.443e-06		-3.017e-06	-3.164e-06	-3.335e-06	-3.436e-06	-3.81e-06	-4.11e-06	-4.395e-06	-4.583e-06	-4.777e-06	-4.908e-06			-2.1807e-06	-2.2269e-06	-2.2537e-06	-2.2835e-06	-2.2975e-06	-2.3168e-06	-2.3327e-06	-2.3567e-06	-2.3542e-06	-2.3835e-06		-2.1862e-06	-2.2436e-06	-2.2821e-06
0.03628		-1.2234e-06	-1.2721e-06	-1.2915e-06	-1.318e-06	-1.352e-06	-1.3765e-06	-1.4013e-06	-1.4102e-06	-1.2721e-06	-1.318e-06		-2.3525e-06	-2.3837e-06	-2.4252e-06	-2.4452e-06	-2.4681e-06	-2.4796e-06	-2.4974e-06	-2.441e-06	-2.448e-06	-2.47e-06		-3.049e-06	-3.17e-06	-3.262e-06	-3.38e-06	-3.767e-06	-4.008e-06	-4.315e-06	-4.524e-06	-4.695e-06	-4.807e-06			-2.1647e-06	-2.2041e-06	-2.2362e-06	-2.2567e-06	-2.2772e-06	-2.2934e-06	-2.2994e-06	-2.3289e-06	-2.3327e-06	-2.3535e-06		-2.1902e-06	-2.2432e-06	-2.2761e-06
0.02928		-1.229e-06	-1.2553e-06	-1.2936e-06	-1.3119e-06	-1.341e-06	-1.3743e-06	-1.3887e-06	-1.4078e-06	-1.2553e-06	-1.3119e-06		-2.3466e-06	-2.3689e-06	-2.4148e-06	-2.4329e-06	-2.4562e-06	-2.4766e-06	-2.4917e-06	-2.407e-06	-2.405e-06	-2.457e-06		-2.949e-06	-3.08e-06	-3.185e-06	-3.337e-06	-3.697e-06	-3.956e-06	-4.255e-06	-4.382e-06	-4.526e-06	-4.697e-06			-2.1523e-06	-2.1929e-06	-2.2171e-06	-2.2394e-06	-2.2545e-06	-2.2791e-06	-2.2825e-06	-2.3132e-06	-2.3073e-06	-2.3345e-06		-2.1987e-06	-2.2495e-06	-2.2822e-06
0.02383		-1.2183e-06	-1.2531e-06	-1.2782e-06	-1.3022e-06	-1.3339e-06	-1.3595e-06	-1.3844e-06	-1.3957e-06	-1.2531e-06	-1.3022e-06		-2.3275e-06	-2.3568e-06	-2.392e-06	-2.4199e-06	-2.4444e-06	-2.4581e-06	-2.4697e-06	-2.4842e-06	-2.4875e-06	-2.391e-06		-2.874e-06	-3.003e-06	-3.141e-06	-3.241e-06	-3.546e-06	-3.867e-06	-4.093e-06	-4.263e-06	-4.441e-06	-4.553e-06			-2.1286e-06	-2.1721e-06	-2.1958e-06	-2.2211e-06	-2.2324e-06	-2.2522e-06	-2.2619e-06	-2.2864e-06	-2.291e-06	-2.3143e-06		-2.1983e-06	-2.2457e-06	-2.2788e-06
0.017679		-1.2119e-06	-1.2617e-06	-1.2734e-06	-1.3033e-06	-1.3329e-06	-1.3577e-06	-1.3721e-06	-1.3836e-06	-1.2617e-06	-1.3033e-06		-2.3122e-06	-2.3407e-06	-2.3822e-06	-2.4009e-06	-2.4233e-06	-2.4415e-06	-2.4548e-06	-2.4697e-06	-2.4734e-06	-2.4784e-06		-2.9e-06	-3.024e-06	-3.097e-06	-3.211e-06	-3.549e-06	-3.769e-06	-4.029e-06	-4.179e-06	-4.383e-06	-4.484e-06			-2.1109e-06	-2.1477e-06	-2.1775e-06	-2.1994e-06	-2.2131e-06	-2.2297e-06	-2.2368e-06	-2.2601e-06	-2.2641e-06	-2.2853e-06		-2.2045e-06	-2.242e-06	-2.2759e-06
0.009352		-1.2157e-06	-1.2435e-06	-1.2789e-06	-1.2951e-06	-1.3213e-06	-1.3505e-06	-1.3673e-06	-1.3878e-06	-1.2435e-06	-1.2951e-06		-2.3003e-06	-2.3233e-06	-2.3675e-06	-2.3862e-06	-2.4051e-06	-2.4284e-06	-2.4432e-06	-2.4527e-06	-2.4547e-06	-2.4681e-06		-2.816e-06	-2.942e-06	-3.018e-06	-3.149e-06	-3.473e-06	-3.726e-06	-3.981e-06	-4.094e-06	-4.212e-06	-4.357e-06			-2.0963e-06	-2.1381e-06	-2.1564e-06	-2.1753e-06	-2.1881e-06	-2.2121e-06	-2.2175e-06	-2.2426e-06	-2.2387e-06	-2.2656e-06		-2.2111e-06	-2.2441e-06	-2.2717e-06
0.006015		-1.2103e-06	-1.2391e-06	-1.2659e-06	-1.2857e-06	-1.3174e-06	-1.3376e-06	-1.3595e-06	-1.3717e-06	-1.2391e-06	-1.2857e-06		-2.2859e-06	-2.3141e-06	-2.3478e-06	-2.378e-06	-2.3967e-06	-2.4091e-06	-2.4205e-06	-2.4415e-06	-2.4416e-06	-2.4459e-06		-2.755e-06	-2.869e-06	-2.994e-06	-3.073e-06	-3.339e-06	-3.653e-06	-3.856e-06	-3.993e-06	-4.153e-06	-4.244e-06			-2.0782e-06	-2.12e-06	-2.139e-06	-2.1596e-06	-2.1729e-06	-2.1917e-06	-2.1993e-06	-2.221e-06	-2.2253e-06	-2.2457e-06		-2.2123e-06	-2.2484e-06	-2.2775e-06
-6.2e-05		-1.2007e-06	-1.2486e-06	-1.2631e-06	-1.29e-06	-1.3231e-06	-1.3421e-06	-1.3508e-06	-1.361e-06	-1.2486e-06	-1.29e-06		-2.2745e-06	-2.3014e-06	-2.3385e-06	-2.3596e-06	-2.3801e-06	-2.3962e-06	-2.4073e-06	-2.4253e-06	-2.4285e-06	-2.4345e-06		-2.771e-06	-2.853e-06	-2.942e-06	-3.06e-06	-3.348e-06	-3.555e-06	-3.803e-06	-3.922e-06	-4.091e-06	-4.193e-06			-2.0642e-06	-2.1037e-06	-2.1332e-06	-2.1487e-06	-2.1548e-06	-2.1779e-06	-2.1788e-06	-2.2027e-06	-2.2036e-06	-2.2214e-06		-2.2229e-06	-2.2491e-06	-2.278e-06
-0.009504		-1.2014e-06	-1.2352e-06	-1.2688e-06	-1.2821e-06	-1.3089e-06	-1.3322e-06	-1.3534e-06	-1.3769e-06	-1.2352e-06	-1.2821e-06		-2.2681e-06	-2.2873e-06	-2.3259e-06	-2.3465e-06	-2.3621e-06	-2.3836e-06	-2.395e-06	-2.4066e-06	-2.4086e-06	-2.4171e-06		-2.708e-06	-2.809e-06	-2.89e-06	-2.985e-06	-3.295e-06	-3.528e-06	-3.756e-06	-3.853e-06	-3.955e-06	-4.059e-06			-2.0537e-06	-2.0918e-06	-2.1095e-06	-2.1264e-06	-2.1341e-06	-2.1565e-06	-2.1602e-06	-2.1829e-06	-2.1823e-06	-2.1997e-06		-2.2313e-06	-2.2539e-06	-2.2799e-06
-0.012361		-1.2036e-06	-1.2311e-06	-1.2586e-06	-1.2741e-06	-1.3015e-06	-1.3241e-06	-1.3452e-06	-1.3524e-06	-1.2311e-06	-1.2741e-06		-2.2569e-06	-2.2779e-06	-2.3093e-06	-2.3372e-06	-2.3539e-06	-2.3667e-06	-2.3762e-06	-2.3949e-06	-2.3939e-06	-2.3961e-06		-2.643e-06	-2.745e-06	-2.867e-06	-2.926e-06	-3.18e-06	-3.483e-06	-3.651e-06	-3.755e-06	-3.913e-06	-3.982e-06			-2.0347e-06	-2.0757e-06	-2.0912e-06	-2.1116e-06	-2.1213e-06	-2.1367e-06	-2.1497e-06	-2.1676e-06	-2.167e-06	-2.1897e-06		-2.2332e-06	-2.2554e-06	-2.2882e-06
-0.018405		-1.2005e-06	-1.2367e-06	-1.2545e-06	-1.2834e-06	-1.3087e-06	-1.328e-06	-1.3379e-06	-1.3468e-06	-1.2367e-06	-1.2834e-06		-2.245e-06	-2.2695e-06	-2.3012e-06	-2.3199e-06	-2.3353e-06	-2.3499e-06	-2.3675e-06	-2.3807e-06	-2.3787e-06	-2.3847e-06		-2.636e-06	-2.713e-06	-2.833e-06	-2.916e-06	-3.182e-06	-3.397e-06	-3.603e-06	-3.716e-06	-3.829e-06	-3.937e-06			-2.0251e-06	-2.059e-06	-2.0795e-06	-2.0996e-06	-2.1077e-06	-2.1279e-06	-2.1307e-06	-2.153e-06	-2.1481e-06	-2.1684e-06		-2.2503e-06	-2.2571e-06	-2.2854e-06
-0.022521		-1.1946e-06	-1.2309e-06	-1.254e-06	-1.2758e-06	-1.2976e-06	-1.3218e-06	-1.3409e-06	-1.3553e-06	-1.2309e-06	-1.2758e-06		-2.2407e-06	-2.2537e-06	-2.2905e-06	-2.3078e-06	-2.3226e-06	-2.3421e-06	-2.3549e-06	-2.3641e-06	-2.3605e-06	-2.3683e-06		-2.61e-06	-2.691e-06	-2.767e-06	-2.813e-06	-3.134e-06	-3.375e-06	-3.564e-06	-3.655e-06	-3.734e-06	-3.806e-06			-2.0173e-06	-2.0489e-06	-2.0646e-06	-2.0781e-06	-2.0891e-06	-2.1078e-06	-2.1113e-06	-2.1291e-06	-2.1291e-06	-2.1475e-06		-2.2585e-06	-2.2683e-06	-2.2945e-06
-0.030464		-1.2059e-06	-1.2285e-06	-1.2554e-06	-1.264e-06	-1.2949e-06	-1.3131e-06	-1.3367e-06	-1.341e-06	-1.2285e-06	-1.264e-06		-2.2323e-06	-2.2486e-06	-2.279e-06	-2.3017e-06	-2.3209e-06	-2.3295e-06	-2.3379e-06	-2.3584e-06	-2.3548e-06	-2.3541e-06		-2.562e-06	-2.636e-06	-2.772e-06	-2.809e-06	-3.039e-06	-3.34e-06	-3.487e-06	-3.564e-06	-3.699e-06	-3.767e-06			-2.0009e-06	-2.0409e-06	-2.0585e-06	-2.0753e-06	-2.0783e-06	-2.0918e-06	-2.1063e-06	-2.1257e-06	-2.1194e-06	-2.1401e-06		-2.2676e-06	-2.2777e-06	-2.3039e-06
-0.0359		-1.1995e-06	-1.2248e-06	-1.2518e-06	-1.2662e-06	-1.298e-06	-1.3186e-06	-1.3266e-06	-1.3378e-06	-1.2248e-06	-1.2662e-06		-2.2229e-06	-2.2365e-06	-2.2697e-06	-2.2862e-06	-2.3017e-06	-2.3116e-06	-2.3269e-06	-2.3408e-06	-2.3379e-06	-2.3407e-06		-2.54e-06	-2.63e-06	-2.711e-06	-2.794e-06	-3.046e-06	-3.237e-06	-3.413e-06	-3.547e-06	-3.617e-06	-3.727e-06			-1.9919e-06	-2.0217e-06	-2.0432e-06	-2.0606e-06	-2.0633e-06	-2.0811e-06	-2.0855e-06	-2.1081e-06	-2.1043e-06	-2.1195e-06		-2.2825e-06	-2.2779e-06	-2.3046e-06
-0.04065		-1.195e-06	-1.2304e-06	-1.2471e-06	-1.2715e-06	-1.2921e-06	-1.3161e-06	-1.3344e-06	-1.3356e-06	-1.2304e-06	-1.2715e-06		-2.2186e-06	-2.2237e-06	-2.262e-06	-2.2793e-06	-2.2875e-06	-2.3069e-06	-2.3177e-06	-2.3276e-06	-2.3189e-06	-2.3283e-06		-2.524e-06	-2.607e-06	-2.666e-06	-2.713e-06	-2.99e-06	-3.266e-06	-3.429e-06	-3.489e-06	-3.553e-06	-3.617e-06			-1.9841e-06	-2.0141e-06	-2.0265e-06	-2.0416e-06	-2.045e-06	-2.0651e-06	-2.0687e-06	-2.0838e-06	-2.0814e-06	-2.0994e-06		-2.2945e-06	-2.2921e-06	-2.3163e-06
-0.0485		-1.2103e-06	-1.2266e-06	-1.2529e-06	-1.2605e-06	-1.2899e-06	-1.3029e-06	-1.3275e-06	-1.3331e-06	-1.2266e-06	-1.2605e-06		-2.2089e-06	-2.2205e-06	-2.2505e-06	-2.271e-06	-2.2793e-06	-2.2918e-06	-2.3023e-06	-2.3193e-06	-2.3097e-06	-2.3122e-06		-2.473e-06	-2.552e-06	-2.667e-06	-2.689e-06	-2.906e-06	-3.235e-06	-3.344e-06	-3.411e-06	-3.521e-06	-3.574e-06			-1.9697e-06	-1.9989e-06	-2.014e-06	-2.0364e-06	-2.0383e-06	-2.0489e-06	-2.0633e-06	-2.0795e-06	-2.0687e-06	-2.0925e-06		-2.3074e-06	-2.3019e-06	-2.3257e-06
-0.05389		-1.2037e-06	-1.2249e-06	-1.249e-06	-1.259e-06	-1.2885e-06	-1.3058e-06	-1.318e-06	-1.3297e-06	-1.2249e-06	-1.259e-06		-2.1999e-06	-2.2124e-06	-2.2432e-06	-2.2586e-06	-2.2663e-06	-2.2797e-06	-2.2927e-06	-2.3031e-06	-2.2981e-06	-2.3004e-06		-2.464e-06	-2.554e-06	-2.583e-06	-2.697e-06	-2.889e-06	-3.15e-06	-3.271e-06	-3.409e-06	-3.463e-06	-3.559e-06			-1.9625e-06	-1.9899e-06	-2.0076e-06	-2.0234e-06	-2.0235e-06	-2.0401e-06	-2.0442e-06	-2.0586e-06	-2.0554e-06	-2.0697e-06		-2.326e-06	-2.3069e-06	-2.3407e-06
-0.06018		-1.2033e-06	-1.2313e-06	-1.2454e-06	-1.2699e-06	-1.2893e-06	-1.3115e-06	-1.3191e-06	-1.3209e-06	-1.2313e-06	-1.2699e-06		-2.2e-06	-2.2001e-06	-2.2388e-06	-2.2475e-06	-2.2561e-06	-2.2757e-06	-2.2831e-06	-2.2933e-06	-2.282e-06	-2.2903e-06		-2.45e-06	-2.525e-06	-2.571e-06	-2.621e-06	-2.88e-06	-3.244e-06	-3.339e-06	-3.342e-06	-3.413e-06	-3.464e-06			-1.9535e-06	-1.9827e-06	-1.9929e-06	-2.0074e-06	-2.0059e-06	-2.0275e-06	-2.0289e-06	-2.0447e-06	-2.0358e-06	-2.0543e-06		-2.3395e-06	-2.3275e-06	-2.3484e-06
-0.06705		-1.2182e-06	-1.2332e-06	-1.2519e-06	-1.2591e-06	-1.2848e-06	-1.2963e-06	-1.3211e-06	-1.3311e-06	-1.2332e-06	-1.2591e-06		-2.1952e-06	-2.1989e-06	-2.2251e-06	-2.2425e-06	-2.2487e-06	-2.2613e-06	-2.2689e-06	-2.2871e-06	-2.2756e-06	-2.2741e-06		-2.402e-06	-2.475e-06	-2.579e-06	-2.613e-06	-2.784e-06	-3.307e-06	-3.305e-06	-3.325e-06	-3.411e-06	-3.449e-06			-1.9395e-06	-1.9697e-06	-1.9785e-06	-1.9977e-06	-2.0001e-06	-2.0112e-06	-2.0144e-06	-2.0379e-06	-2.0291e-06	-2.047e-06		-2.3513e-06	-2.3397e-06	-2.3721e-06
-0.07199		-1.2123e-06	-1.2285e-06	-1.2531e-06	-1.2556e-06	-1.2809e-06	-1.2941e-06	-1.3102e-06	-1.317e-06	-1.2285e-06	-1.2556e-06		-2.1901e-06	-2.1936e-06	-2.2227e-06	-2.2335e-06	-2.2412e-06	-2.2514e-06	-2.2642e-06	-2.274e-06	-2.2656e-06	-2.2667e-06		-2.4854e-06	-2.479e-06	-2.497e-06	-2.608e-06	-2.759e-06	-3.285e-06	-3.273e-06	-3.348e-06	-3.376e-06	-3.44e-06			-1.9366e-06	-1.9625e-06	-1.976e-06	-1.9852e-06	-1.9849e-06	-2.0026e-06	-2.0028e-06	-2.0245e-06	-2.0179e-06	-2.0282e-06		-2.3758e-06	-2.3493e-06	-2.3849e-06
-0.07865		-1.2074e-06	-1.2417e-06	-1.2423e-06	-1.268e-06	-1.2861e-06	-1.3026e-06	-1.311e-06	-1.3184e-06	-1.2417e-06	-1.268e-06		-2.1943e-06	-2.1846e-06	-2.2196e-06	-2.2234e-06	-2.2308e-06	-2.2495e-06	-2.2565e-06	-2.2651e-06	-2.2514e-06	-2.2613e-06		-2.4713e-06	-2.44e-06	-2.497e-06	-2.548e-06	-2.77e-06	-3.294e-06	-3.316e-06	-3.257e-06	-3.322e-06	-3.352e-06			-1.9265e-06	-1.9567e-06	-1.9626e-06	-1.9729e-06	-1.9668e-06	-1.9941e-06	-1.9913e-06	-2.0083e-06	-1.9956e-06	-2.0147e-06		-2.3983e-06	-2.3701e-06	-2.3943e-06
-0.0877		-1.2246e-06	-1.2388e-06	-1.2597e-06	-1.2625e-06	-1.2857e-06	-1.2953e-06	-1.3188e-06	-1.3242e-06	-1.2388e-06	-1.2625e-06		-2.1907e-06	-2.1904e-06	-2.2121e-06	-2.2272e-06	-2.2319e-06	-2.2425e-06	-2.2492e-06	-2.2655e-06	-2.253e-06	-2.2507e-06		-2.4561e-06	-2.404e-06	-2.507e-06	-2.539e-06	-2.689e-06	-3.22e-06	-3.206e-06	-3.229e-06	-3.3e-06	-3.31e-06			-1.9234e-06	-1.9465e-06	-1.9557e-06	-1.9675e-06	-1.9651e-06	-1.9773e-06	-1.9865e-06	-2.0049e-06	-1.9968e-06	-2.0111e-06		-2.4135e-06	-2.3925e-06	-2.4141e-06
-0.09001		-1.2212e-06	-1.2346e-06	-1.2551e-06	-1.2551e-06	-1.2759e-06	-1.2898e-06	-1.3082e-06	-1.3157e-06	-1.2346e-06	-1.2551e-06		-2.1867e-06	-2.1851e-06	-2.2098e-06	-2.2171e-06	-2.2244e-06	-2.232e-06	-2.2432e-06	-2.254e-06	-2.2457e-06	-2.2449e-06		-2.4382e-06	-2.49e-06	-2.432e-06	-2.537e-06	-2.661e-06	-3.083e-06	-3.117e-06	-3.209e-06	-3.246e-06	-3.299e-06			-1.9175e-06	-1.9396e-06	-1.953e-06	-1.961e-06	-1.9599e-06	-1.9717e-06	-1.9725e-06	-1.9935e-06	-1.9792e-06	-1.9943e-06		-2.4365e-06	-2.4035e-06	-2.4291e-06
-0.09667		-1.2131e-06	-1.2421e-06	-1.2489e-06	-1.2759e-06	-1.2874e-06	-1.3028e-06	-1.307e-06	-1.3167e-06	-1.2421e-06	-1.2759e-06		-2.1945e-06	-2.1798e-06	-2.2065e-06	-2.2123e-06	-2.218e-06	-2.2326e-06	-2.2363e-06	-2.2498e-06	-2.2337e-06	-2.2406e-06		-2.4185e-06	-2.4707e-06	-2.435e-06	-2.486e-06	-2.691e-06	-3.082e-06	-3.136e-06	-3.092e-06	-3.159e-06	-3.206e-06			-1.9118e-06	-1.9379e-06	-1.9418e-06	-1.9478e-06	-1.9452e-06	-1.963e-06	-1.9585e-06	-1.9753e-06	-1.9674e-06	-1.9783e-06		-2.4612e-06	-2.4246e-06	-2.4414e-06
-0.10439		-1.2255e-06	-1.2416e-06	-1.2581e-06	-1.2623e-06	-1.286e-06	-1.2958e-06	-1.3183e-06	-1.3205e-06	-1.2416e-06	-1.2623e-06		-2.1881e-06	-2.1851e-06	-2.2016e-06	-2.2164e-06	-2.2189e-06	-2.2267e-06	-2.2297e-06	-2.2464e-06	-2.2353e-06	-2.2303e-06		-2.3987e-06	-2.4557e-06	-2.439e-06	-2.433e-06	-2.608e-06	-3.012e-06	-3.047e-06	-3.077e-06	-3.145e-06	-3.144e-06			-1.9061e-06	-1.9241e-06	-1.9331e-06	-1.9443e-06	-1.9376e-06	-1.9507e-06	-1.9534e-06	-1.969e-06	-1.9631e-06	-1.9709e-06		-2.4815e-06	-2.4473e-06	-2.4785e-06
-0.10837		-1.2335e-06	-1.2413e-06	-1.2579e-06	-1.2627e-06	-1.2815e-06	-1.2944e-06	-1.31e-06	-1.3175e-06	-1.2413e-06	-1.2627e-06		-2.1881e-06	-2.1845e-06	-2.2063e-06	-2.2099e-06	-2.2155e-06	-2.2219e-06	-2.2326e-06	-2.2401e-06	-2.2309e-06	-2.2311e-06		-2.3895e-06	-2.4419e-06	-2.376e-06	-2.479e-06	-2.593e-06	-2.924e-06	-2.988e-06	-3.061e-06	-3.113e-06	-3.161e-06			-1.9053e-06	-1.9227e-06	-1.9313e-06	-1.9372e-06	-1.9329e-06	-1.9445e-06	-1.9475e-06	-1.9625e-06	-1.9501e-06	-1.9613e-06		-2.5139e-06	-2.4665e-06	-2.4884e-06
-0.11388		-1.2279e-06	-1.2437e-06	-1.2565e-06	-1.279e-06	-1.295e-06	-1.3099e-06	-1.3073e-06	-1.3173e-06	-1.2437e-06	-1.279e-06		-2.1945e-06	-2.1818e-06	-2.2032e-06	-2.2075e-06	-2.2093e-06	-2.2212e-06	-2.2281e-06	-2.2356e-06	-2.2235e-06	-2.2261e-06		-2.3652e-06	-2.4175e-06	-2.4713e-06	-2.416e-06	-2.612e-06	-2.927e-06	-3.013e-06	-2.985e-06	-3.01e-06	-3.083e-06			-1.9011e-06	-1.9203e-06	-1.9212e-06	-1.9275e-06	-1.9233e-06	-1.9401e-06	-1.9356e-06	-1.9495e-06	-1.9413e-06	-1.9522e-06		-2.5377e-06	-2.4934e-06	-2.5147e-06
-0.11799		-1.2355e-06	-1.2561e-06	-1.2624e-06	-1.2735e-06	-1.2927e-06	-1.301e-06	-1.3231e-06	-1.3159e-06	-1.2561e-06	-1.2735e-06		-2.1961e-06	-2.1894e-06	-2.2032e-06	-2.2142e-06	-2.2149e-06	-2.2196e-06	-2.2229e-06	-2.2361e-06	-2.2277e-06	-2.2208e-06		-2.3572e-06	-2.4079e-06	-2.4627e-06	-2.4939e-06	-2.534e-06	-2.917e-06	-2.947e-06	-2.971e-06	-3.046e-06	-3.014e-06			-1.9001e-06	-1.9145e-06	-1.9167e-06	-1.927e-06	-1.9238e-06	-1.9315e-06	-1.9343e-06	-1.9483e-06	-1.9366e-06	-1.9472e-06		-2.5611e-06	-2.522e-06	-2.5439e-06
-0.12655		-1.2473e-06	-1.2531e-06	-1.2758e-06	-1.2711e-06	-1.2872e-06	-1.2971e-06	-1.3155e-06	-1.324e-06	-1.2531e-06	-1.2711e-06		-2.2036e-06	-2.1917e-06	-2.2073e-06	-2.2108e-06	-2.2111e-06	-2.2174e-06	-2.2265e-06	-2.2313e-06	-2.2246e-06	-2.2241e-06		-2.3482e-06	-2.4003e-06	-2.4433e-06	-2.49e-06	-2.547e-06	-2.84e-06	-2.894e-06	-2.964e-06	-3.023e-06	-3.07e-06			-1.901e-06	-1.9129e-06	-1.9181e-06	-1.9258e-06	-1.921e-06	-1.9297e-06	-1.927e-06	-1.9467e-06	-1.9373e-06	-1.9414e-06		-2.5953e-06	-2.5426e-06	-2.558e-06
-0.13195		-1.2431e-06	-1.2541e-06	-1.2683e-06	-1.2839e-06	-1.2995e-06	-1.3191e-06	-1.312e-06	-1.3178e-06	-1.2541e-06	-1.2839e-06		-2.2111e-06	-2.192e-06	-2.2085e-06	-2.2121e-06	-2.2097e-06	-2.222e-06	-2.2267e-06	-2.229e-06	-2.2233e-06	-2.2227e-06		-2.3314e-06	-2.3822e-06	-2.4325e-06	-2.4729e-06	-2.563e-06	-2.84e-06	-2.912e-06	-2.915e-06	-2.915e-06	-3.002e-06			-1.9008e-06	-1.9147e-06	-1.9155e-06	-1.9189e-06	-1.912e-06	-1.9297e-06	-1.9236e-06	-1.9364e-06	-1.9268e-06	-1.9341e-06		-2.6299e-06	-2.5724e-06	-2.5971e-06
-0.13686		-1.253e-06	-1.2729e-06	-1.2687e-06	-1.2867e-06	-1.3054e-06	-1.3113e-06	-1.3318e-06	-1.3169e-06	-1.2729e-06	-1.2867e-06		-2.2154e-06	-2.2005e-06	-2.2118e-06	-2.2211e-06	-2.2169e-06	-2.2227e-06	-2.226e-06	-2.2371e-06	-2.2268e-06	-2.2247e-06		-2.329e-06	-2.3732e-06	-2.4253e-06	-2.4545e-06	-2.491e-06	-2.869e-06	-2.873e-06	-2.896e-06	-2.961e-06	-2.941e-06			-1.8972e-06	-1.9113e-06	-1.9125e-06	-1.9217e-06	-1.9109e-06	-1.9228e-06	-1.9225e-06	-1.9333e-06	-1.9213e-06	-1.9348e-06		-2.6633e-06	-2.6022e-06	-2.6258e-06
-0.1447		-1.2717e-06	-1.2737e-06	-1.2924e-06	-1.2879e-06	-1.3026e-06	-1.3123e-06	-1.3285e-06	-1.3336e-06	-1.2737e-06	-1.2879e-06		-2.2242e-06	-2.2133e-06	-2.224e-06	-2.2234e-06	-2.2206e-06	-2.2268e-06	-2.2347e-06	-2.2385e-06	-2.234e-06	-2.2307e-06		-2.3263e-06	-2.3713e-06	-2.4123e-06	-2.4585e-06	-2.504e-06	-2.802e-06	-2.846e-06	-2.927e-06	-2.951e-06	-2.997e-06			-1.9105e-06	-1.9143e-06	-1.9197e-06	-1.9227e-06	-1.922e-06	-1.9237e-06	-1.9234e-06	-1.939e-06	-1.9289e-06	-1.9354e-06		-2.634e-06	-2.6332e-06	-2.6537e-06
-0.14985		-1.2662e-06	-1.2747e-06	-1.2875e-06	-1.2946e-06	-1.3073e-06	-1.3265e-06	-1.3243e-06	-1.3301e-06	-1.2747e-06	-1.2946e-06		-2.2323e-06	-2.2123e-06	-2.2263e-06	-2.2252e-06	-2.2235e-06	-2.2315e-06	-2.2359e-06	-2.2363e-06	-2.2315e-06	-2.2321e-06		-2.3135e-06	-2.3573e-06	-2.4009e-06	-2.4438e-06	-2.493e-06	-2.81e-06	-2.857e-06	-2.866e-06	-2.866e-06	-2.937e-06			-1.9114e-06	-1.9173e-06	-1.9191e-06	-1.9217e-06	-1.9145e-06	-1.9285e-06	-1.9188e-06	-1.9354e-06	-1.9171e-06	-1.9305e-06		-2.692e-06	-2.6687e-06	-2.6779e-06
-0.15637		-1.277e-06	-1.2946e-06	-1.2901e-06	-1.3057e-06	-1.3216e-06	-1.3285e-06	-1.3399e-06	-1.3355e-06	-1.2946e-06	-1.3057e-06		-2.2406e-06	-2.2219e-06	-2.2292e-06	-2.2336e-06	-2.2313e-06	-2.2345e-06	-2.2348e-06	-2.2455e-06	-2.2371e-06	-2.2339e-06		-2.3123e-06	-2.3587e-06	-2.4009e-06	-2.4334e-06	-2.461e-06	-2.855e-06	-2.849e-06	-2.837e-06	-2.921e-06	-2.904e-06			-1.9119e-06	-1.9209e-06	-1.9182e-06	-1.9261e-06	-1.9163e-06	-1.9214e-06	-1.9206e-06	-1.9337e-06	-1.9268e-06	-1.9335e-06		-2.659e-06	-2.659e-06	-2.655e-06
-0.16279		-1.3015e-06	-1.2953e-06	-1.3148e-06	-1.3059e-06	-1.3198e-06	-1.3278e-06	-1.3413e-06	-1.3481e-06	-1.2953e-06	-1.3059e-06		-2.2457e-06	-2.2326e-06	-2.2381e-06	-2.2362e-06	-2.2318e-06	-2.2383e-06	-2.243e-06	-2.2434e-06	-2.2425e-06	-2.2393e-06		-2.3147e-06	-2.3552e-06	-2.389e-06	-2.4313e-06	-2.478e-06	-2.797e-06	-2.825e-06	-2.885e-06	-2.909e-06	-2.963e-06			-1.9191e-06	-1.9219e-06	-1.9232e-06	-1.9266e-06	-1.9207e-06	-1.9267e-06	-1.9182e-06	-1.9382e-06	-1.9261e-06	-1.9289e-06		-2.735e-06	-2.628e-06	-2.671e-06
-0.16826		-1.296e-06	-1.2967e-06	-1.3097e-06	-1.315e-06	-1.3262e-06	-1.3381e-06	-1.3433e-06	-1.3484e-06	-1.2967e-06	-1.315e-06		-2.2585e-06	-2.2368e-06	-2.2478e-06	-2.241e-06	-2.2396e-06	-2.2483e-06	-2.2505e-06	-2.2505e-06	-2.2421e-06	-2.2464e-06		-2.3075e-06	-2.3436e-06	-2.3852e-06	-2.4204e-06	-2.454e-06	-2.822e-06	-2.842e-06	-2.841e-06	-2.845e-06	-2.902e-06			-1.9274e-06	-1.9325e-06	-1.9269e-06	-1.9268e-06	-1.9174e-06	-1.9345e-06	-1.9228e-06	-1.9365e-06	-1.9215e-06	-1.9305e-06		-2.796e-06	-2.699e-06	-2.69e-06
-0.17452		-1.3046e-06	-1.3219e-06	-1.3145e-06	-1.3279e-06	-1.347e-06	-1.3479e-06	-1.354e-06	-1.3487e-06	-1.3219e-06	-1.3279e-06		-2.2669e-06	-2.2495e-06	-2.2517e-06	-2.2521e-06	-2.2499e-06	-2.2535e-06	-2.2505e-06	-2.2604e-06	-2.2515e-06	-2.2492e-06		-2.3107e-06	-2.3456e-06	-2.3907e-06	-2.4201e-06	-2.453e-06	-2.859e-06	-2.837e-06	-2.801e-06	-2.905e-06	-2.882e-06			-1.9293e-06	-1.934e-06	-1.9318e-06	-1.934e-06	-1.9267e-06	-1.9289e-06	-1.9279e-06	-1.9407e-06	-1.9309e-06	-1.9343e-06		-2.792e-06	-2.768e-06	-2.765e-06
-0.18416		-1.3251e-06	-1.3236e-06	-1.3428e-06	-1.3274e-06	-1.3396e-06	-1.3502e-06	-1.3645e-06	-1.3684e-06	-1.3236e-06	-1.3274e-06		-2.2762e-06	-2.2612e-06	-2.2628e-06	-2.2589e-06	-2.2544e-06	-2.2569e-06	-2.2625e-06	-2.2614e-06	-2.2628e-06	-2.2579e-06		-2.3167e-06	-2.3497e-06	-2.3872e-06	-2.4231e-06	-2.471e-06	-2.806e-06	-2.821e-06	-2.872e-06	-2.887e-06	-2.926e-06			-1.9417e-06	-1.9404e-06	-1.9411e-06	-1.939e-06	-1.936e-06	-1.9389e-06	-1.9301e-06	-1.9482e-06	-1.9359e-06	-1.9356e-06		-2.867e-06	-2.751e-06	-2.783e-06
-0.18633		-1.3278e-06	-1.3282e-06	-1.3405e-06	-1.3406e-06	-1.3478e-06	-1.3587e-06	-1.3663e-06	-1.3757e-06	-1.3282e-06	-1.3406e-06		-2.2969e-06	-2.2676e-06	-2.2739e-06	-2.2672e-06	-2.2647e-06	-2.2713e-06	-2.2708e-06	-2.2693e-06	-2.2633e-06	-2.2661e-06		-2.3162e-06	-2.3499e-06	-2.3837e-06	-2.4185e-06	-2.457e-06	-2.849e-06	-2.848e-06	-2.837e-06	-2.836e-06	-2.889e-06			-1.9524e-06	-1.9547e-06	-1.9477e-06	-1.9433e-06	-1.9376e-06	-1.9491e-06	-1.938e-06	-1.9466e-06	-1.9329e-06	-1.9409e-06		-2.925e-06	-2.825e-06	-2.819e-06
-0.19246		-1.3405e-06	-1.3494e-06	-1.344e-06	-1.3586e-06	-1.3714e-06	-1.3765e-06	-1.3742e-06	-1.3695e-06	-1.3494e-06	-1.3586e-06		-2.306e-06	-2.2841e-06	-2.2799e-06	-2.2815e-06	-2.278e-06	-2.2758e-06	-2.2748e-06	-2.2849e-06	-2.2746e-06	-2.2721e-06		-2.32e-06	-2.3482e-06	-2.3958e-06	-2.4185e-06	-2.455e-06	-2.886e-06	-2.853e-06	-2.797e-06	-2.878e-06	-2.866e-06			-1.9555e-06	-1.9577e-06	-1.9553e-06	-1.9563e-06	-1.9491e-06	-1.9475e-06	-1.9481e-06	-1.9556e-06	-1.9441e-06	-1.9484e-06		-2.937e-06	-2.878e-06	-2.896e-06
-0.19877		-1.3557e-06	-1.3637e-06	-1.3667e-06	-1.3647e-06	-1.3753e-06	-1.3809e-06	-1.3925e-06	-1.4025e-06	-1.3637e-06	-1.3647e-06		-2.3277e-06	-2.3056e-06	-2.302e-06	-2.2957e-06	-2.2905e-06	-2.2926e-06	-2.2976e-06	-2.2975e-06	-2.2907e-06	-2.2941e-06		-2.337e-06	-2.3628e-06	-2.3983e-06	-2.4329e-06	-2.477e-06	-2.848e-06	-2.84e-06	-2.882e-06	-2.891e-06	-2.899e-06			-1.9756e-06	-1.9711e-06	-1.9727e-06	-1.97e-06	-1.9581e-06	-1.9664e-06	-1.9537e-06	-1.97e-06	-1.9557e-06	-1.9546e-06		-3.033e-06	-2.895e-06	-2.954e-06
-0.20451		-1.3725e-06	-1.3646e-06	-1.3753e-06	-1.3751e-06	-1.3803e-06	-1.3893e-06	-1.3961e-06	-1.402e-06	-1.3646e-06	-1.3751e-06		-2.3465e-06	-2.3131e-06	-2.3132e-06	-2.307e-06	-2.3025e-06	-2.3065e-06	-2.3066e-06	-2.3029e-06	-2.2953e-06	-2.3011e-06		-2.3439e-06	-2.3703e-06	-2.4e-06	-2.4347e-06	-2.477e-06	-2.893e-06	-2.88e-06	-2.853e-06	-2.851e-06	-2.896e-06			-1.9882e-06	-1.9895e-06	-1.9817e-06	-1.9715e-06	-1.9671e-06	-1.9702e-06	-1.9633e-06	-1.9686e-06	-1.9614e-06	-1.9638e-06		-3.078e-06	-2.981e-06	-2.967e-06
-0.21024		-1.3796e-06	-1.3826e-06	-1.3792e-06	-1.3937e-06	-1.4085e-06	-1.4129e-06	-1.4078e-06	-1.3999e-06	-1.3826e-06	-1.3937e-06		-2.3561e-06	-2.3315e-06	-2.3214e-06	-2.3238e-06	-2.32e-06	-2.3161e-06	-2.3145e-06	-2.32e-06	-2.3155e-06	-2.3087e-06		-2.3499e-06	-2.3748e-06	-2.4141e-06	-2.4406e-06	-2.472e-06	-2.919e-06	-2.886e-06	-2.826e-06	-2.867e-06	-2.89e-06			-2.0007e-06	-1.9972e-06	-1.9926e-06	-1.9919e-06	-1.9854e-06	-1.9841e-06	-1.9795e-06	-1.9895e-06	-1.9732e-06	-1.9747e-06		-3.108e-06	-3.034e-06	-3.055e-06
-0.2136		-1.3989e-06	-1.4034e-06	-1.4019e-06	-1.398e-06	-1.4087e-06	-1.411e-06	-1.4293e-06	-1.4299e-06	-1.4034e-06	-1.398e-06		-2.3779e-06	-2.3515e-06	-2.345e-06	-2.3373e-06	-2.3301e-06	-2.3315e-06	-2.3344e-06	-2.3289e-06	-2.3284e-06	-2.3267e-06		-2.3715e-06	-2.392e-06	-2.4205e-06	-2.4477e-06	-2.508e-06	-2.905e-06	-2.868e-06	-2.913e-06	-2.919e-06	-2.894e-06			-2.0218e-06	-2.0107e-06	-2.0106e-06	-2.0043e-06	-1.9957e-06	-1.9973e-06	-1.9847e-06	-1.9984e-06	-1.9859e-06	-1.9817e-06		-3.196e-06	-3.062e-06	-3.099e-06
-0.22253		-1.4198e-06	-1.4082e-06	-1.4155e-06	-1.4143e-06	-1.4187e-06	-1.4291e-06	-1.4314e-06	-1.4351e-06	-1.4082e-06	-1.4143e-06		-2.4e-06	-2.3659e-06	-2.3642e-06	-2.3542e-06	-2.3481e-06	-2.3526e-06	-2.35e-06	-2.3444e-06	-2.3369e-06	-2.3421e-06		-2.3801e-06	-2.4025e-06	-2.4272e-06	-2.4591e-06	-2.516e-06	-2.963e-06	-2.935e-06	-2.881e-06	-2.866e-06	-2.915e-06			-2.0375e-06	-2.0336e-06	-2.0219e-06	-2.0137e-06	-2.0086e-06	-2.0112e-06	-2.0033e-06	-2.009e-06	-1.9961e-06	-1.9977e-06		-3.255e-06	-3.158e-06	-3.141e-06
-0.22809		-1.4344e-06	-1.4259e-06	-1.423e-06	-1.4294e-06	-1.4409e-06	-1.4469e-06	-1.4473e-06	-1.4415e-06	-1.4259e-06	-1.4294e-06		-2.4169e-06	-2.3929e-06	-2.3809e-06	-2.3766e-06	-2.3707e-06	-2.3653e-06	-2.3649e-06	-2.3673e-06	-2.3594e-06	-2.3568e-06		-2.392e-06	-2.4143e-06	-2.4441e-06	-2.4661e-06	-2.503e-06	-2.962e-06	-2.903e-06	-2.893e-06	-2.896e-06	-2.911e-06			-2.0507e-06	-2.0497e-06	-2.0417e-06	-2.0393e-06	-2.0247e-06	-2.0257e-06	-2.0203e-06	-2.0271e-06	-2.0115e-06	-2.0166e-06		-3.3e-06	-3.225e-06	-3.248e-06
-0.23317		-1.4505e-06	-1.4528e-06	-1.4443e-06	-1.4475e-06	-1.455e-06	-1.4582e-06	-1.4667e-06	-1.459e-06	-1.4528e-06	-1.4475e-06		-2.4437e-06	-2.4159e-06	-2.4081e-06	-2.3968e-06	-2.3891e-06	-2.3874e-06	-2.3867e-06	-2.3821e-06	-2.3792e-06	-2.3793e-06		-2.4176e-06	-2.4409e-06	-2.4612e-06	-2.4868e-06	-2.551e-06	-2.977e-06	-2.934e-06	-2.971e-06	-2.953e-06	-2.949e-06			-2.0804e-06	-2.0686e-06	-2.0618e-06	-2.0543e-06	-2.0473e-06	-2.0441e-06	-2.0307e-06	-2.0395e-06	-2.0329e-06	-2.0267e-06		-3.395e-06	-3.265e-06	-3.276e-06
-0.24063		-1.4776e-06	-1.461e-06	-1.4648e-06	-1.4628e-06	-1.4637e-06	-1.4747e-06	-1.4777e-06	-1.4791e-06	-1.461e-06	-1.4628e-06		-2.4765e-06	-2.4399e-06	-2.4337e-06	-2.4191e-06	-2.4127e-06	-2.4144e-06	-2.4095e-06	-2.4034e-06	-2.3993e-06	-2.4009e-06		-2.4347e-06	-2.4533e-06	-2.4734e-06	-2.5033e-06	-2.571e-06	-3.035e-06	-3.007e-06	-2.941e-06	-2.927e-06	-2.966e-06			-2.1054e-06	-2.0955e-06	-2.0832e-06	-2.074e-06	-2.0662e-06	-2.0633e-06	-2.0517e-06	-2.0585e-06	-2.0468e-06	-2.0496e-06		-3.473e-06	-3.369e-06	-3.358e-06
-0.24614		-1.4958e-06	-1.481e-06	-1.4779e-06	-1.4756e-06	-1.4862e-06	-1.4903e-06	-1.4951e-06	-1.4918e-06	-1.481e-06	-1.4756e-06		-2.5089e-06	-2.4737e-06	-2.4573e-06	-2.4489e-06	-2.4441e-06	-2.4357e-06	-2.4303e-06	-2.4315e-06	-2.4251e-06	-2.4219e-06		-2.4571e-06	-2.4713e-06	-2.4963e-06	-2.5175e-06	-2.53e-06	-3.057e-06	-2.969e-06	-2.952e-06	-2.959e-06	-2.956e-06			-2.1258e-06	-2.1194e-06	-2.1081e-06	-2.1023e-06	-2.0905e-06	-2.0837e-06	-2.0783e-06	-2.0859e-06	-2.0731e-06	-2.0702e-06		-3.531e-06	-3.449e-06	-3.475e-06
-0.25232		-1.5144e-06	-1.5129e-06	-1.4986e-06	-1.5026e-06	-1.5084e-06	-1.5118e-06	-1.5123e-06	-1.5031e-06	-1.5129e-06	-1.5026e-06		-2.5443e-06	-2.5055e-06	-2.4939e-06	-2.4777e-06	-2.4687e-06	-2.4658e-06	-2.4608e-06	-2.457e-06	-2.4537e-06	-2.4547e-06		-2.4857e-06	-2.5028e-06	-2.5171e-06	-2.5385e-06	-2.617e-06	-3.088e-06	-3.027e-06	-3.005e-06	-3.02e-06	-3.018e-06			-2.1586e-06	-2.1433e-06	-2.1369e-06	-2.1267e-06	-2.1143e-06	-2.1099e-06	-2.0957e-06	-2.1079e-06	-2.0958e-06	-2.0905e-06		-3.637e-06	-3.517e-06	-3.528e-06
-0.25969		-1.5481e-06	-1.5226e-06	-1.5299e-06	-1.5231e-06	-1.5217e-06	-1.5305e-06	-1.5346e-06	-1.5376e-06	-1.5226e-06	-1.5231e-06		-2.5895e-06	-2.5451e-06	-2.5337e-06	-2.5139e-06	-2.5028e-06	-2.5034e-06	-2.4981e-06	-2.4934e-06	-2.4845e-06	-2.4889e-06		-2.5099e-06	-2.5264e-06	-2.5407e-06	-2.5635e-06	-2.628e-06	-3.153e-06	-3.097e-06	-3.028e-06	-2.992e-06	-3.032e-06			-2.1974e-06	-2.1794e-06	-2.1683e-06	-2.1563e-06	-2.1433e-06	-2.1439e-06	-2.1276e-06	-2.1377e-06	-2.1222e-06	-2.1173e-06		-3.748e-06	-3.63e-06	-3.62e-06
-0.26414		-1.5685e-06	-1.5473e-06	-1.5421e-06	-1.5377e-06	-1.5471e-06	-1.5494e-06	-1.5517e-06	-1.5453e-06	-1.5473e-06	-1.5377e-06		-2.6294e-06	-2.5885e-06	-2.5668e-06	-2.5541e-06	-2.5444e-06	-2.534e-06	-2.5232e-06	-2.5261e-06	-2.5211e-06	-2.5163e-06		-2.5369e-06	-2.5452e-06	-2.568e-06	-2.5906e-06	-2.582e-06	-3.184e-06	-3.073e-06	-3.041e-06	-3.059e-06	-3.039e-06			-2.2286e-06	-2.2121e-06	-2.1994e-06	-2.1844e-06	-2.1755e-06	-2.1663e-06	-2.1609e-06	-2.1659e-06	-2.1535e-06	-2.1452e-06		-3.809e-06	-3.731e-06	-3.762e-06
-0.27045		-1.5885e-06	-1.5852e-06	-1.5661e-06	-1.5714e-06	-1.5728e-06	-1.577e-06	-1.568e-06	-1.5654e-06	-1.5852e-06	-1.5714e-06		-2.6769e-06	-2.6319e-06	-2.6135e-06	-2.5899e-06	-2.5812e-06	-2.5753e-06	-2.5645e-06	-2.5614e-06	-2.5581e-06	-2.5589e-06		-2.5711e-06	-2.5805e-06	-2.5981e-06	-2.6165e-06	-2.694e-06	-3.21e-06	-3.137e-06	-3.088e-06	-3.12e-06	-3.108e-06			-2.2694e-06	-2.2451e-06	-2.2383e-06	-2.2252e-06	-2.2097e-06	-2.2053e-06	-2.1876e-06	-2.2011e-06	-2.1817e-06	-2.1747e-06		-3.955e-06	-3.809e-06	-3.83e-06
-0.2796		-1.6181e-06	-1.5984e-06	-1.6009e-06	-1.5933e-06	-1.5891e-06	-1.5943e-06	-1.6011e-06	-1.6063e-06	-1.5984e-06	-1.5933e-06		-2.678e-06	-2.6779e-06	-2.6585e-06	-2.6363e-06	-2.622e-06	-2.6203e-06	-2.6083e-06	-2.601e-06	-2.5964e-06	-2.5974e-06		-2.6013e-06	-2.6086e-06	-2.6241e-06	-2.6425e-06	-2.723e-06	-3.29e-06	-3.203e-06	-3.138e-06	-3.091e-06	-3.117e-06			-2.3182e-06	-2.2938e-06	-2.2732e-06	-2.257e-06	-2.2425e-06	-2.2401e-06	-2.221e-06	-2.2305e-06	-2.2189e-06	-2.2098e-06		-4.073e-06	-3.939e-06	-3.956e-06
-0.2816		-1.6516e-06	-1.6279e-06	-1.6189e-06	-1.6122e-06	-1.6157e-06	-1.6167e-06	-1.6222e-06	-1.6128e-06	-1.6279e-06	-1.6122e-06		-2.699e-06	-2.67e-06	-2.7076e-06	-2.691e-06	-2.6774e-06	-2.6681e-06	-2.6521e-06	-2.6534e-06	-2.646e-06	-2.6409e-06		-2.6347e-06	-2.6405e-06	-2.6612e-06	-2.673e-06	-2.7e-06	-3.34e-06	-3.21e-06	-3.157e-06	-3.16e-06	-3.146e-06			-2.3593e-06	-2.3355e-06	-2.3214e-06	-2.3022e-06	-2.2912e-06	-2.2769e-06	-2.2697e-06	-2.2725e-06	-2.2589e-06	-2.2512e-06		-4.146e-06	-4.068e-06	-4.117e-06
-0.2873		-1.6788e-06	-1.6635e-06	-1.6468e-06	-1.6527e-06	-1.6538e-06	-1.6525e-06	-1.6459e-06	-1.6423e-06	-1.6635e-06	-1.6527e-06		-2.739e-06	-2.732e-06	-2.695e-06	-2.659e-06	-2.652e-06	-2.624e-06	-2.7107e-06	-2.7067e-06	-2.7001e-06	-2.6965e-06		-2.6748e-06	-2.6803e-06	-2.6985e-06	-2.651e-06	-2.797e-06	-3.373e-06	-3.274e-06	-3.223e-06	-3.225e-06	-3.214e-06			-2.4131e-06	-2.386e-06	-2.3721e-06	-2.3534e-06	-2.3339e-06	-2.3294e-06	-2.3071e-06	-2.3174e-06	-2.3007e-06	-2.287e-06		-4.336e-06	-4.149e-06	-4.203e-06
-0.2927		-1.7055e-06	-1.6895e-06	-1.6835e-06	-1.6781e-06	-1.6749e-06	-1.6803e-06	-1.6831e-06	-1.6816e-06	-1.6895e-06	-1.6781e-06		-2.857e-06	-2.771e-06	-2.772e-06	-2.717e-06	-2.691e-06	-2.726e-06	-2.719e-06	-2.672e-06	-2.67e-06	-2.693e-06		-2.637e-06	-2.639e-06	-2.632e-06	-2.635e-06	-2.826e-06	-3.452e-06	-3.352e-06	-3.276e-06	-3.223e-06	-3.207e-06			-2.4732e-06	-2.4451e-06	-2.4225e-06	-2.3979e-06	-2.3793e-06	-2.376e-06	-2.3556e-06	-2.363e-06	-2.3471e-06	-2.3332e-06		-4.475e-06	-4.335e-06	-4.362e-06
-0.2994		-1.7532e-06	-1.7245e-06	-1.7123e-06	-1.7025e-06	-1.705e-06	-1.7067e-06	-1.7127e-06	-1.7015e-06	-1.7245e-06	-1.7025e-06		-2.895e-06	-2.859e-06	-2.794e-06	-2.82e-06	-2.822e-06	-2.755e-06	-2.722e-06	-2.769e-06	-2.747e-06	-2.707e-06		-2.658e-06	-2.656e-06	-2.694e-06	-2.692e-06	-2.816e-06	-3.522e-06	-3.374e-06	-3.307e-06	-3.308e-06	-3.278e-06			-2.5345e-06	-2.5081e-06	-2.4841e-06	-2.4618e-06	-2.4462e-06	-2.4287e-06	-2.422e-06	-2.4229e-06	-2.4041e-06	-2.3907e-06		-4.584e-06	-4.487e-06	-4.534e-06
-0.3051		-1.7868e-06	-1.7636e-06	-1.7479e-06	-1.7472e-06	-1.7475e-06	-1.7488e-06	-1.7396e-06	-1.7353e-06	-1.7636e-06	-1.7472e-06		-2.957e-06	-2.942e-06	-2.889e-06	-2.857e-06	-2.837e-06	-2.798e-06	-2.825e-06	-2.805e-06	-2.82e-06	-2.791e-06		-2.723e-06	-2.718e-06	-2.737e-06	-2.763e-06	-2.931e-06	-3.537e-06	-3.439e-06	-3.392e-06	-3.339e-06	-3.371e-06			-2.6041e-06	-2.5676e-06	-2.5529e-06	-2.5257e-06	-2.5058e-06	-2.4942e-06	-2.4707e-06	-2.4777e-06	-2.4665e-06	-2.4451e-06		-4.799e-06	-4.595e-06	-4.671e-06
-0.3091		-1.8217e-06	-1.8039e-06	-1.7839e-06	-1.7813e-06	-1.7799e-06	-1.7812e-06	-1.7864e-06	-1.7719e-06	-1.8039e-06	-1.7813e-06		-3.098e-06	-2.987e-06	-2.994e-06	-2.941e-06	-2.906e-06	-2.942e-06	-2.93e-06	-2.862e-06	-2.846e-06	-2.884e-06		-2.789e-06	-2.791e-06	-2.768e-06	-2.751e-06	-2.979e-06	-3.663e-06	-3.549e-06	-3.446e-06	-3.38e-06	-3.37e-06			-2.6841e-06	-2.6468e-06	-2.6211e-06	-2.5908e-06	-2.5681e-06	-2.5593e-06	-2.5388e-06	-2.5387e-06	-2.5217e-06	-2.5062e-06		-4.978e-06	-4.826e-06	-4.852e-06
-0.3179		-1.8807e-06	-1.8433e-06	-1.8321e-06	-1.8176e-06	-1.819e-06	-1.8159e-06	-1.8234e-06	-1.8095e-06	-1.8433e-06	-1.8176e-06		-3.16e-06	-3.115e-06	-3.034e-06	-3.053e-06	-3.034e-06	-2.981e-06	-2.949e-06	-2.99e-06	-2.965e-06	-2.918e-06		-2.818e-06	-2.825e-06	-2.858e-06	-2.845e-06	-2.991e-06	-3.75e-06	-3.579e-06	-3.503e-06	-3.489e-06	-3.461e-06			-2.659e-06	-2.7285e-06	-2.7046e-06	-2.6741e-06	-2.6523e-06	-2.6372e-06	-2.6221e-06	-2.6249e-06	-2.6009e-06	-2.5849e-06		-5.136e-06	-5.027e-06	-5.097e-06
-0.3233		-1.9205e-06	-1.8893e-06	-1.8763e-06	-1.8598e-06	-1.8614e-06	-1.8651e-06	-1.8543e-06	-1.8451e-06	-1.8893e-06	-1.8598e-06		-3.242e-06	-3.212e-06	-3.152e-06	-3.115e-06	-3.087e-06	-3.046e-06	-3.066e-06	-3.024e-06	-3.054e-06	-3.028e-06		-2.895e-06	-2.898e-06	-2.88e-06	-2.927e-06	-3.081e-06	-3.761e-06	-3.633e-06	-3.607e-06	-3.541e-06	-3.555e-06			-2.781e-06	-2.714e-06	-2.733e-06	-2.713e-06	-2.7345e-06	-2.7229e-06	-2.6953e-06	-2.6982e-06	-2.6831e-06	-2.6581e-06		-5.405e-06	-5.191e-06	-5.27e-06
-0.3291		-1.9644e-06	-1.9409e-06	-1.9154e-06	-1.9137e-06	-1.9109e-06	-1.9132e-06	-1.9083e-06	-1.8906e-06	-1.9409e-06	-1.9137e-06		-3.412e-06	-3.262e-06	-3.279e-06	-3.213e-06	-3.172e-06	-3.199e-06	-3.177e-06	-3.121e-06	-3.086e-06	-3.141e-06		-2.979e-06	-2.979e-06	-2.96e-06	-2.945e-06	-3.157e-06	-3.926e-06	-3.79e-06	-3.67e-06	-3.598e-06	-3.58e-06			-2.888e-06	-2.834e-06	-2.783e-06	-2.732e-06	-2.705e-06	-2.743e-06	-2.683e-06	-2.662e-06	-2.637e-06	-2.7443e-06		-5.627e-06	-5.474e-06	-5.497e-06
-0.3361		-2.0354e-06	-1.9921e-06	-1.9725e-06	-1.9542e-06	-1.955e-06	-1.9497e-06	-1.9554e-06	-1.9414e-06	-1.9921e-06	-1.9542e-06		-3.499e-06	-3.431e-06	-3.343e-06	-3.354e-06	-3.309e-06	-3.267e-06	-3.229e-06	-3.262e-06	-3.24e-06	-3.189e-06		-3.026e-06	-3.022e-06	-3.067e-06	-3.042e-06	-3.177e-06	-4.032e-06	-3.833e-06	-3.74e-06	-3.718e-06	-3.679e-06			-2.952e-06	-2.915e-06	-2.875e-06	-2.869e-06	-2.877e-06	-2.786e-06	-2.827e-06	-2.82e-06	-2.799e-06	-2.807e-06		-5.835e-06	-5.726e-06	-5.813e-06
-0.3412		-2.0841e-06	-2.0431e-06	-2.0246e-06	-2.003e-06	-2.0048e-06	-2.0021e-06	-1.9983e-06	-1.9835e-06	-2.0431e-06	-2.003e-06		-3.607e-06	-3.564e-06	-3.503e-06	-3.44e-06	-3.409e-06	-3.379e-06	-3.378e-06	-3.331e-06	-3.352e-06	-3.327e-06		-3.136e-06	-3.13e-06	-3.068e-06	-3.143e-06	-3.263e-06	-4.064e-06	-3.899e-06	-3.871e-06	-3.789e-06	-3.796e-06			-3.108e-06	-3.033e-06	-3.062e-06	-2.99e-06	-2.97e-06	-2.962e-06	-2.908e-06	-2.938e-06	-2.907e-06	-2.855e-06		-6.162e-06	-5.957e-06	-6.063e-06
-0.3478		-2.1387e-06	-2.1109e-06	-2.0748e-06	-2.0747e-06	-2.0689e-06	-2.0674e-06	-2.0555e-06	-2.0405e-06	-2.1109e-06	-2.0747e-06		-3.822e-06	-3.651e-06	-3.663e-06	-3.556e-06	-3.525e-06	-3.555e-06	-3.501e-06	-3.459e-06	-3.418e-06	-3.474e-06		-3.227e-06	-3.216e-06	-3.189e-06	-3.192e-06	-3.387e-06	-4.246e-06	-4.082e-06	-3.928e-06	-3.881e-06	-3.855e-06			-3.242e-06	-3.211e-06	-3.149e-06	-3.091e-06	-3.049e-06	-3.091e-06	-3.027e-06	-3.01e-06	-2.975e-06	-2.963e-06		-6.449e-06	-6.317e-06	-6.35e-06
-0.3557		-2.2202e-06	-2.1707e-06	-2.1486e-06	-2.126e-06	-2.1241e-06	-2.1197e-06	-2.1227e-06	-2.1045e-06	-2.1707e-06	-2.126e-06		-3.934e-06	-3.862e-06	-3.755e-06	-3.758e-06	-3.696e-06	-3.645e-06	-3.607e-06	-3.631e-06	-3.602e-06	-3.548e-06		-3.302e-06	-3.283e-06	-3.311e-06	-3.298e-06	-3.428e-06	-4.366e-06	-4.156e-06	-4.054e-06	-4.01e-06	-3.967e-06			-3.394e-06	-3.316e-06	-3.282e-06	-3.273e-06	-3.251e-06	-3.198e-06	-3.198e-06	-3.211e-06	-3.195e-06	-3.153e-06		-6.711e-06	-6.62e-06	-6.73e-06
-0.3592		-2.2841e-06	-2.2361e-06	-2.2088e-06	-2.187e-06	-2.1821e-06	-2.1824e-06	-2.1771e-06	-2.1663e-06	-2.2361e-06	-2.187e-06		-4.104e-06	-4.036e-06	-3.957e-06	-3.88e-06	-3.843e-06	-3.789e-06	-3.789e-06	-3.748e-06	-3.754e-06	-3.724e-06		-3.444e-06	-3.429e-06	-3.364e-06	-3.428e-06	-3.529e-06	-4.446e-06	-4.251e-06	-4.201e-06	-4.119e-06	-4.112e-06			-3.57e-06	-3.506e-06	-3.515e-06	-3.435e-06	-3.417e-06	-3.419e-06	-3.344e-06	-3.373e-06	-3.347e-06	-3.276e-06		-7.087e-06	-6.912e-06	-7.035e-06
-0.3658		-2.3475e-06	-2.3147e-06	-2.2731e-06	-2.2739e-06	-2.2634e-06	-2.2594e-06	-2.2437e-06	-2.2339e-06	-2.3147e-06	-2.2739e-06		-4.35e-06	-4.174e-06	-4.156e-06	-4.037e-06	-4.001e-06	-4.01e-06	-3.955e-06	-3.918e-06	-3.868e-06	-3.908e-06		-3.551e-06	-3.51e-06	-3.507e-06	-3.5e-06	-3.698e-06	-4.656e-06	-4.463e-06	-4.272e-06	-4.218e-06	-4.195e-06			-3.775e-06	-3.736e-06	-3.662e-06	-3.6e-06	-3.551e-06	-3.588e-06	-3.512e-06	-3.494e-06	-3.481e-06	-3.436e-06		-7.441e-06	-7.311e-06	-7.383e-06
-0.3752		-2.4362e-06	-2.3897e-06	-2.3642e-06	-2.3404e-06	-2.3357e-06	-2.3303e-06	-2.3319e-06	-2.3081e-06	-2.3897e-06	-2.3404e-06		-4.529e-06	-4.445e-06	-4.316e-06	-4.302e-06	-4.235e-06	-4.174e-06	-4.12e-06	-4.135e-06	-4.112e-06	-4.028e-06		-3.664e-06	-3.64e-06	-3.66e-06	-3.621e-06	-3.75e-06	-4.806e-06	-4.559e-06	-4.435e-06	-4.383e-06	-4.325e-06			-3.967e-06	-3.908e-06	-3.862e-06	-3.842e-06	-3.791e-06	-3.751e-06	-3.754e-06	-3.767e-06	-3.747e-06	-3.681e-06		-7.758e-06	-7.682e-06	-7.822e-06
-0.3773		-2.5263e-06	-2.4708e-06	-2.4438e-06	-2.416e-06	-2.4073e-06	-2.4059e-06	-2.4022e-06	-2.3867e-06	-2.4708e-06	-2.416e-06		-4.75e-06	-4.659e-06	-4.566e-06	-4.478e-06	-4.431e-06	-4.352e-06	-4.353e-06	-4.3e-06	-4.295e-06	-4.255e-06		-3.843e-06	-3.814e-06	-3.746e-06	-3.789e-06	-3.899e-06	-4.927e-06	-4.71e-06	-4.625e-06	-4.536e-06	-4.505e-06			-4.236e-06	-4.167e-06	-4.175e-06	-4.071e-06	-4.041e-06	-4.006e-06	-3.975e-06	-3.991e-06	-3.966e-06	-3.88e-06		-8.167e-06	-8.013e-06	-8.161e-06
-0.3838		-2.6042e-06	-2.5609e-06	-2.5227e-06	-2.5183e-06	-2.5065e-06	-2.5078e-06	-2.4843e-06	-2.4671e-06	-2.5609e-06	-2.5183e-06		-5.033e-06	-4.854e-06	-4.799e-06	-4.689e-06	-4.633e-06	-4.608e-06	-4.574e-06	-4.525e-06	-4.464e-06	-4.467e-06		-3.955e-06	-3.91e-06	-3.92e-06	-3.899e-06	-4.079e-06	-5.163e-06	-4.94e-06	-4.73e-06	-4.642e-06	-4.623e-06			-4.499e-06	-4.446e-06	-4.375e-06	-4.304e-06	-4.231e-06	-4.273e-06	-4.205e-06	-4.185e-06	-4.159e-06	-4.107e-06		-8.567e-06	-8.439e-06	-8.539e-06
-0.388		-2.7059e-06	-2.6564e-06	-2.6215e-06	-2.5991e-06	-2.5932e-06	-2.5904e-06	-2.5905e-06	-2.568e-06	-2.6564e-06	-2.5991e-06		-5.273e-06	-5.163e-06	-5.023e-06	-4.996e-06	-4.918e-06	-4.818e-06	-4.783e-06	-4.783e-06	-4.745e-06	-4.653e-06		-4.137e-06	-4.103e-06	-4.114e-06	-4.034e-06	-4.167e-06	-5.351e-06	-5.085e-06	-4.932e-06	-4.866e-06	-4.755e-06			-4.745e-06	-4.678e-06	-4.646e-06	-4.605e-06	-4.519e-06	-4.494e-06	-4.498e-06	-4.494e-06	-4.466e-06	-4.393e-06		-8.909e-06	-8.842e-06	-8.996e-06
-0.3957		-2.805e-06	-2.7579e-06	-2.7232e-06	-2.6942e-06	-2.6823e-06	-2.6868e-06	-2.6807e-06	-2.665e-06	-2.7579e-06	-2.6942e-06		-5.536e-06	-5.419e-06	-5.321e-06	-5.215e-06	-5.156e-06	-5.063e-06	-5.058e-06	-4.997e-06	-4.982e-06	-4.924e-06		-4.36e-06	-4.323e-06	-4.265e-06	-4.284e-06	-4.369e-06	-5.505e-06	-5.275e-06	-5.159e-06	-5.047e-06	-5.022e-06			-5.047e-06	-4.988e-06	-4.983e-06	-4.88e-06	-4.836e-06	-4.801e-06	-4.774e-06	-4.782e-06	-4.754e-06	-4.658e-06		-9.329e-06	-9.188e-06	-9.34e-06
-0.4015		-2.806e-06	-2.733e-06	-2.718e-06	-2.789e-06	-2.763e-06	-2.846e-06	-2.667e-06	-2.679e-06	-2.733e-06	-2.789e-06		-5.854e-06	-5.658e-06	-5.59e-06	-5.48e-06	-5.401e-06	-5.366e-06	-5.326e-06	-5.249e-06	-5.192e-06	-5.173e-06		-4.516e-06	-4.47e-06	-4.47e-06	-4.445e-06	-4.592e-06	-5.755e-06	-5.535e-06	-5.325e-06	-5.174e-06	-5.185e-06			-5.352e-06	-5.312e-06	-5.249e-06	-5.165e-06	-5.072e-06	-5.125e-06	-5.046e-06	-5.03e-06	-5.006e-06	-4.934e-06		-9.741e-06	-9.611e-06	-9.721e-06
-0.4057		-2.927e-06	-2.963e-06	-2.816e-06	-2.87e-06	-2.886e-06	-2.85e-06	-2.937e-06	-2.773e-06	-2.963e-06	-2.87e-06		-6.137e-06	-5.984e-06	-5.855e-06	-5.826e-06	-5.722e-06	-5.614e-06	-5.579e-06	-5.563e-06	-5.49e-06	-5.409e-06		-4.781e-06	-4.715e-06	-4.716e-06	-4.614e-06	-4.733e-06	-6.022e-06	-5.74e-06	-5.575e-06	-5.481e-06	-5.359e-06			-5.644e-06	-5.58e-06	-5.537e-06	-5.493e-06	-5.411e-06	-5.379e-06	-5.38e-06	-5.361e-06	-5.328e-06	-5.264e-06		-1.0094e-05	-1.002e-05	-1.0175e-05
-0.4137		-3.164e-06	-3.027e-06	-3.062e-06	-2.928e-06	-2.918e-06	-2.911e-06	-2.953e-06	-2.97e-06	-3.027e-06	-2.928e-06		-6.428e-06	-6.296e-06	-6.18e-06	-6.071e-06	-5.975e-06	-5.888e-06	-5.878e-06	-5.81e-06	-5.781e-06	-5.712e-06		-5.049e-06	-4.982e-06	-4.91e-06	-4.931e-06	-4.982e-06	-6.215e-06	-5.971e-06	-5.844e-06	-5.71e-06	-5.669e-06			-6.005e-06	-5.91e-06	-5.897e-06	-5.812e-06	-5.757e-06	-5.716e-06	-5.686e-06	-5.685e-06	-5.668e-06	-5.569e-06		-1.0518e-05	-1.0361e-05	-1.0521e-05
-0.4196		-3.175e-06	-3.094e-06	-3.092e-06	-3.104e-06	-3.063e-06	-3.155e-06	-3.036e-06	-3.061e-06	-3.094e-06	-3.104e-06		-6.766e-06	-6.552e-06	-6.481e-06	-6.357e-06	-6.265e-06	-6.217e-06	-6.176e-06	-6.075e-06	-6.019e-06	-5.987e-06		-5.256e-06	-5.2e-06	-5.137e-06	-5.14e-06	-5.23e-06	-6.504e-06	-6.261e-06	-6.071e-06	-5.888e-06	-5.885e-06			-6.317e-06	-6.275e-06	-6.204e-06	-6.109e-06	-6.011e-06	-6.069e-06	-5.981e-06	-5.964e-06	-5.935e-06	-5.852e-06		-1.0939e-05	-1.0787e-05	-1.0899e-05
-0.4256		-3.332e-06	-3.371e-06	-3.201e-06	-3.274e-06	-3.292e-06	-3.245e-06	-3.29e-06	-3.132e-06	-3.371e-06	-3.274e-06		-7.063e-06	-6.883e-06	-6.766e-06	-6.712e-06	-6.602e-06	-6.497e-06	-6.432e-06	-6.422e-06	-6.331e-06	-6.249e-06		-5.564e-06	-5.492e-06	-5.474e-06	-5.377e-06	-5.443e-06	-6.833e-06	-6.537e-06	-6.353e-06	-6.247e-06	-6.129e-06			-6.617e-06	-6.571e-06	-6.519e-06	-6.469e-06	-6.378e-06	-6.341e-06	-6.333e-06	-6.311e-06	-6.287e-06	-6.21e-06		-1.1267e-05	-1.1197e-05	-1.1323e-05
-0.4321		-3.607e-06	-3.465e-06	-3.506e-06	-3.36e-06	-3.34e-06	-3.333e-06	-3.386e-06	-3.391e-06	-3.465e-06	-3.36e-06		-7.37e-06	-7.227e-06	-7.106e-06	-6.983e-06	-6.868e-06	-6.787e-06	-6.773e-06	-6.691e-06	-6.655e-06	-6.577e-06		-5.89e-06	-5.823e-06	-5.727e-06	-5.739e-06	-5.745e-06	-7.084e-06	-6.832e-06	-6.722e-06	-6.535e-06	-6.503e-06			-7.023e-06	-6.908e-06	-6.9e-06	-6.807e-06	-6.754e-06	-6.711e-06	-6.658e-06	-6.684e-06	-6.652e-06	-6.533e-06		-1.1702e-05	-1.154e-05	-1.17e-05
-0.4374		-3.64e-06	-3.55e-06	-3.554e-06	-3.535e-06	-3.481e-06	-3.543e-06	-3.491e-06	-3.5e-06	-3.55e-06	-3.535e-06		-7.728e-06	-7.495e-06	-7.42e-06	-7.28e-06	-7.185e-06	-7.129e-06	-7.077e-06	-6.971e-06	-6.905e-06	-6.873e-06		-6.146e-06	-6.083e-06	-5.986e-06	-5.993e-06	-6.019e-06	-7.426e-06	-7.166e-06	-6.966e-06	-6.789e-06	-6.754e-06			-7.377e-06	-7.323e-06	-7.232e-06	-7.119e-06	-7.037e-06	-7.083e-06	-6.988e-06	-6.959e-06	-6.924e-06	-6.838e-06		-1.2112e-05	-1.1959e-05	-1.2074e-05
-0.444		-3.797e-06	-3.876e-06	-3.682e-06	-3.761e-06	-3.777e-06	-3.737e-06	-3.711e-06	-3.592e-06	-3.876e-06	-3.761e-06		-8.039e-06	-7.837e-06	-7.714e-06	-7.625e-06	-7.53e-06	-7.421e-06	-7.327e-06	-7.334e-06	-7.236e-06	-7.148e-06		-6.484e-06	-6.404e-06	-6.379e-06	-6.29e-06	-6.304e-06	-7.797e-06	-7.495e-06	-7.271e-06	-7.174e-06	-7.072e-06			-7.707e-06	-7.648e-06	-7.583e-06	-7.521e-06	-7.423e-06	-7.38e-06	-7.379e-06	-7.342e-06	-7.313e-06	-7.22e-06		-1.2442e-05	-1.2377e-05	-1.2492e-05
		-4.071e-06	-3.972e-06	-4.03e-06	-3.862e-06	-3.861e-06	-3.856e-06	-3.918e-06	-3.919e-06	-3.972e-06	-3.862e-06		-8.342e-06	-8.176e-06	-8.049e-06	-7.92e-06	-7.801e-06	-7.709e-06	-7.689e-06	-7.601e-06	-7.563e-06	-7.472e-06		-6.841e-06	-6.778e-06	-6.67e-06	-6.687e-06	-6.652e-06	-8.099e-06	-7.848e-06	-7.692e-06	-7.516e-06	-7.47e-06			-8.151e-06	-8.02e-06	-8.002e-06	-7.897e-06	-7.802e-06	-7.78e-06	-7.701e-06	-7.755e-06	-7.705e-06	-7.55e-06		-1.2869e-05	-1.2704e-05	-1.2863e-05
[truncated: 7 more columns]

## Sheet: VOLTAMOGRAM
			VOLTAMMOGRAM OF ALL FLORAL ORIGIN OF HONEY(ZnONPs Electrode)
V	EUCALYPTUS	PUMPKIN	LEECHI	MUSTARD	TIL
-0.4493	-4.004e-06	-5.448e-06	-9.373e-06	-7.591e-06	-1.6853e-05
-0.4466	-3.365e-06	-4.227e-06	-7.968e-06	-6.001e-06	-1.5009e-05
-0.4378	-2.854e-06	-3.41e-06	-6.905e-06	-4.977e-06	-1.3519e-05
-0.432	-2.609e-06	-2.86e-06	-5.981e-06	-4.173e-06	-1.2197e-05
-0.428	-2.374e-06	-2.427e-06	-5.192e-06	-3.54e-06	-1.111e-05
-0.419	-2.111e-06	-2.0041e-06	-4.524e-06	-2.982e-06	-1.0123e-05
-0.4138	-1.9101e-06	-1.6909e-06	-3.894e-06	-2.472e-06	-9.184e-06
-0.4052	-1.7337e-06	-1.4127e-06	-3.325e-06	-2.081e-06	-8.398e-06
-0.4017	-1.5577e-06	-1.1678e-06	-2.855e-06	-1.6671e-06	-7.677e-06
-0.3953	-1.4123e-06	-9.606e-07	-2.385e-06	-1.3305e-06	-6.917e-06
-0.388	-1.291e-06	-7.803e-07	-1.9585e-06	-1.0409e-06	-6.306e-06
-0.3839	-1.1607e-06	-6.217e-07	-1.5798e-06	-7.796e-07	-5.728e-06
-0.377	-1.0514e-06	-4.879e-07	-1.2245e-06	-5.444e-07	-5.104e-06
-0.3716	-9.628e-07	-3.719e-07	-8.981e-07	-3.523e-07	-4.612e-06
-0.3664	-8.556e-07	-2.66e-07	-6.154e-07	-1.821e-07	-4.123e-06
-0.3597	-7.708e-07	-1.699e-07	-3.431e-07	3.2767e-07	-3.616e-06
-0.3541	-7.045e-07	3.2767e-07	-1.125e-07	9.23e-08	-3.226e-06
-0.351	-6.281e-07	-1.2e-08	2.6122e-07	3.2767e-07	-2.819e-06
-0.3417	-5.56e-07	3.2767e-07	3.2767e-07	2.717e-07	-2.42e-06
-0.3356	-4.935e-07	1.043e-07	4.115e-07	3.189e-07	-2.1201e-06
-0.3305	-4.379e-07	3.2767e-07	5.19e-07	3.67e-07	-1.8308e-06
-0.3243	-3.836e-07	2.109e-07	6.148e-07	4.121e-07	-1.5744e-06
-0.3176	-3.326e-07	3.2767e-07	6.828e-07	4.411e-07	-1.3487e-06
-0.3091	-2.932e-07	2.872e-07	7.326e-07	4.657e-07	-1.1548e-06
-0.3058	-2.453e-07	3.212e-07	7.781e-07	4.998e-07	-9.827e-07
-0.2995	-2.04e-07	3.421e-07	8.064e-07	5.179e-07	-8.45e-07
-0.2928	7.937e-08	3.793e-07	8.283e-07	5.337e-07	-7.313e-07
-0.2886	1.2792e-07	4.069e-07	8.498e-07	5.556e-07	-6.215e-07
-0.2816	1.6291e-07	4.227e-07	8.615e-07	5.668e-07	-5.375e-07
-0.2757	1.9289e-07	4.507e-07	8.699e-07	5.776e-07	-4.591e-07
-0.271	2.2195e-07	4.738e-07	8.856e-07	5.958e-07	-3.829e-07
-0.2634	2.4814e-07	4.925e-07	8.968e-07	6.01e-07	-3.258e-07
-0.2578	2.7318e-07	5.11e-07	8.982e-07	6.078e-07	-2.608e-07
-0.2557	3.8e-08	5.304e-07	9.088e-07	6.212e-07	-1.982e-07
-0.2449	2.6776e-07	5.479e-07	9.164e-07	6.291e-07	1.1611e-07
-0.2395	9.2e-08	5.634e-07	9.151e-07	6.313e-07	1.7984e-07
-0.23485	2.9827e-07	5.773e-07	9.212e-07	6.444e-07	2.2989e-07
-0.22857	1.27e-07	5.886e-07	9.237e-07	6.438e-07	2.7307e-07
-0.2225	3.2767e-07	6.03e-07	9.186e-07	6.489e-07	4.41e-08
-0.21361	1.554e-07	6.182e-07	9.206e-07	6.604e-07	2.9433e-07
-0.2105	3.2767e-07	6.246e-07	9.242e-07	6.641e-07	1.135e-07
-0.20383	2.003e-07	6.364e-07	9.192e-07	6.697e-07	3.2767e-07
-0.19772	3.2767e-07	6.472e-07	9.279e-07	6.739e-07	1.86e-07
-0.19258	2.222e-07	6.561e-07	9.303e-07	6.787e-07	3.2767e-07
-0.18631	3.2767e-07	6.691e-07	9.307e-07	6.862e-07	2.456e-07
-0.18045	2.399e-07	6.822e-07	9.394e-07	6.908e-07	2.687e-07
-0.1762	3.2767e-07	6.845e-07	9.443e-07	6.967e-07	2.873e-07
-0.16797	2.779e-07	6.995e-07	9.456e-07	6.978e-07	3.137e-07
-0.16251	2.811e-07	7.064e-07	9.54e-07	7.067e-07	3.434e-07
-0.1602	2.873e-07	7.107e-07	9.59e-07	7.131e-07	3.638e-07
-0.14995	3.121e-07	7.272e-07	9.634e-07	7.206e-07	3.845e-07
-0.14397	3.174e-07	7.331e-07	9.725e-07	7.249e-07	4.107e-07
-0.13707	3.183e-07	7.374e-07	9.807e-07	7.272e-07	4.314e-07
-0.13284	3.421e-07	7.532e-07	9.893e-07	7.398e-07	4.549e-07
-0.12668	3.5e-07	7.558e-07	9.946e-07	7.506e-07	4.806e-07
-0.11835	3.5e-07	7.635e-07	1.0066e-06	7.513e-07	4.969e-07
-0.11498	3.679e-07	7.752e-07	1.0097e-06	7.608e-07	5.13e-07
-0.10908	3.782e-07	7.827e-07	1.022e-06	7.691e-07	5.433e-07
-0.10247	3.761e-07	7.9e-07	1.0325e-06	7.743e-07	5.601e-07
-0.09764	3.98e-07	8.056e-07	1.036e-06	7.832e-07	5.809e-07
-0.09046	4.068e-07	8.107e-07	1.049e-06	7.95e-07	6.063e-07
-0.08501	4.041e-07	8.202e-07	1.0622e-06	7.98e-07	6.224e-07
-0.08123	4.213e-07	8.358e-07	1.0671e-06	8.055e-07	6.469e-07
-0.07203	4.315e-07	8.545e-07	1.0868e-06	8.247e-07	6.765e-07
-0.06626	4.364e-07	8.584e-07	1.091e-06	8.262e-07	6.933e-07
-0.06285	4.454e-07	8.758e-07	1.1001e-06	8.43e-07	7.164e-07
-0.05521	4.554e-07	8.98e-07	1.1167e-06	8.591e-07	7.392e-07
-0.04885	4.649e-07	9.051e-07	1.1266e-06	8.611e-07	7.615e-07
-0.04047	4.704e-07	9.237e-07	1.1361e-06	8.767e-07	7.855e-07
-0.03691	4.783e-07	9.482e-07	1.1501e-06	8.968e-07	8.103e-07
-0.03053	4.899e-07	9.625e-07	1.1624e-06	9.11e-07	8.317e-07
-0.02265	4.884e-07	9.86e-07	1.1727e-06	9.277e-07	8.523e-07
-0.019047	5.028e-07	1.0123e-06	1.1938e-06	9.487e-07	8.834e-07
-0.012307	5.128e-07	1.0263e-06	1.2054e-06	9.616e-07	9.02e-07
-0.006337	5.083e-07	1.0544e-06	1.2132e-06	9.79e-07	9.267e-07
-0.000674	5.186e-07	1.0788e-06	1.2342e-06	1.0037e-06	9.525e-07
0.005958	5.293e-07	1.0956e-06	1.2508e-06	1.0222e-06	9.667e-07
0.011074	5.32e-07	1.125e-06	1.2632e-06	1.0361e-06	9.933e-07
0.013788	5.362e-07	1.1493e-06	1.2839e-06	1.0648e-06	1.0213e-06
0.023779	5.475e-07	1.1736e-06	1.3016e-06	1.0833e-06	1.0369e-06
0.029699	5.552e-07	1.1994e-06	1.3155e-06	1.1032e-06	1.0568e-06
0.03454	5.536e-07	1.227e-06	1.3405e-06	1.1297e-06	1.0808e-06
0.04158	5.684e-07	1.2616e-06	1.3659e-06	1.1525e-06	1.101e-06
0.04763	5.798e-07	1.2832e-06	1.3802e-06	1.1698e-06	1.12e-06
0.05607	5.751e-07	1.3092e-06	1.4048e-06	1.1983e-06	1.147e-06
0.05906	5.897e-07	1.3379e-06	1.4303e-06	1.2191e-06	1.1558e-06
0.06661	6.038e-07	1.3683e-06	1.4485e-06	1.2421e-06	1.1727e-06
0.0731	6.003e-07	1.405e-06	1.4774e-06	1.2665e-06	1.1982e-06
0.07776	6.198e-07	1.4338e-06	1.5e-06	1.2896e-06	1.2089e-06
0.08378	6.401e-07	1.4696e-06	1.5197e-06	1.3155e-06	1.2261e-06
0.08932	6.343e-07	1.5067e-06	1.551e-06	1.3392e-06	1.247e-06
0.09509	6.601e-07	1.548e-06	1.5812e-06	1.3692e-06	1.2582e-06
0.10219	6.846e-07	1.5868e-06	1.6033e-06	1.394e-06	1.2744e-06
0.10709	6.872e-07	1.6257e-06	1.6339e-06	1.4236e-06	1.294e-06
0.10975	7.117e-07	1.6665e-06	1.6595e-06	1.4516e-06	1.3041e-06
0.11963	7.396e-07	1.7196e-06	1.689e-06	1.4864e-06	1.321e-06
0.12586	7.525e-07	1.7612e-06	1.7179e-06	1.5146e-06	1.3358e-06
0.1317	7.721e-07	1.8145e-06	1.7502e-06	1.5514e-06	1.3496e-06
0.1377	8.085e-07	1.8733e-06	1.7825e-06	1.5893e-06	1.3648e-06
0.14346	8.314e-07	1.921e-06	1.8168e-06	1.6314e-06	1.3885e-06
0.15235	8.503e-07	1.9778e-06	1.8521e-06	1.6728e-06	1.4014e-06
0.15539	8.901e-07	2.0465e-06	1.8914e-06	1.7231e-06	1.4194e-06
0.162	9.158e-07	2.0979e-06	1.9301e-06	1.7684e-06	1.4472e-06
0.1683	9.297e-07	2.1539e-06	1.9708e-06	1.8136e-06	1.4625e-06
0.17345	9.763e-07	2.2184e-06	2.0084e-06	1.8648e-06	1.4854e-06
0.18003	1.0049e-06	2.2735e-06	2.0541e-06	1.9228e-06	1.5158e-06
0.18557	1.022e-06	2.3321e-06	2.0986e-06	1.9693e-06	1.5331e-06
0.18996	1.0655e-06	2.3952e-06	2.1401e-06	2.0216e-06	1.5641e-06
0.19821	1.0929e-06	2.4543e-06	2.19e-06	2.0761e-06	1.5967e-06
0.20366	1.1176e-06	2.5034e-06	2.2328e-06	2.1192e-06	1.6236e-06
0.20614	1.1515e-06	2.5652e-06	2.2766e-06	2.171e-06	1.6578e-06
0.21588	1.1826e-06	2.63e-06	2.3313e-06	2.2214e-06	1.6968e-06
0.2219	1.2122e-06	2.678e-06	2.3688e-06	2.2533e-06	1.7265e-06
0.22909	1.2396e-06	2.756e-06	2.4062e-06	2.2898e-06	1.763e-06
0.23359	1.2654e-06	2.835e-06	2.4491e-06	2.3272e-06	1.8029e-06
0.23963	1.2981e-06	2.82e-06	2.481e-06	2.3528e-06	1.8373e-06
0.24834	1.3184e-06	2.927e-06	2.5114e-06	2.3786e-06	1.8721e-06
0.25142	1.346e-06	3.022e-06	2.5427e-06	2.4005e-06	1.914e-06
0.25806	1.3748e-06	3.036e-06	2.5632e-06	2.42e-06	1.9471e-06
0.26444	1.3953e-06	3.177e-06	2.5807e-06	2.4377e-06	1.9837e-06
0.26936	1.4306e-06	3.283e-06	2.605e-06	2.4656e-06	2.0256e-06
0.2766	1.4632e-06	3.326e-06	2.6133e-06	2.4805e-06	2.0491e-06
0.2826	1.496e-06	3.483e-06	2.6194e-06	2.4997e-06	2.0842e-06
0.2856	1.5336e-06	3.616e-06	2.6298e-06	2.5264e-06	2.1219e-06
0.2946	1.5811e-06	3.718e-06	2.6336e-06	2.5548e-06	2.1453e-06
0.3005	1.6242e-06	3.894e-06	2.6336e-06	2.5858e-06	2.1761e-06
0.3034	1.6587e-06	4.061e-06	2.639e-06	2.6264e-06	2.2096e-06
0.3124	1.7116e-06	4.259e-06	2.6417e-06	2.67e-06	2.2357e-06
0.3189	1.7642e-06	4.444e-06	2.6394e-06	2.694e-06	2.2666e-06
0.3267	1.8033e-06	4.67e-06	2.647e-06	2.807e-06	2.304e-06
0.3304	1.8634e-06	4.909e-06	2.6549e-06	2.849e-06	2.333e-06
0.3369	1.9182e-06	5.148e-06	2.6572e-06	2.912e-06	2.3667e-06
0.3445	1.945e-06	5.393e-06	2.6721e-06	3.024e-06	2.4098e-06
0.3482	1.9984e-06	5.608e-06	2.733e-06	3.086e-06	2.4396e-06
0.3548	2.0506e-06	5.829e-06	2.674e-06	3.191e-06	2.4847e-06
0.3604	2.0728e-06	6.039e-06	2.75e-06	3.315e-06	2.5347e-06
0.366	2.1194e-06	6.208e-06	2.771e-06	3.38e-06	2.5736e-06
0.3728	2.1646e-06	6.387e-06	2.754e-06	3.497e-06	2.6266e-06
0.3783	2.186e-06	6.537e-06	2.83e-06	3.619e-06	2.6856e-06
0.3809	2.2288e-06	6.662e-06	2.876e-06	3.709e-06	2.766e-06
0.3911	2.273e-06	6.825e-06	2.873e-06	3.802e-06	2.813e-06
0.3962	2.2981e-06	6.9e-06	2.938e-06	3.913e-06	2.917e-06
0.401	2.3265e-06	6.995e-06	2.988e-06	3.965e-06	2.961e-06
0.4087	2.3726e-06	7.162e-06	2.998e-06	4.067e-06	3.007e-06
0.4143	2.402e-06	7.215e-06	3.04e-06	4.183e-06	3.127e-06
0.4231	2.4296e-06	7.299e-06	3.097e-06	4.22e-06	3.163e-06
0.4264	2.4718e-06	7.461e-06	3.085e-06	4.318e-06	3.209e-06
0.4327	2.5035e-06	7.521e-06	3.138e-06	4.436e-06	3.333e-06
0.4396	2.5256e-06	7.588e-06	3.198e-06	4.436e-06	3.38e-06
0.4444	2.5744e-06	7.723e-06	3.186e-06	4.528e-06	3.433e-06
0.4508	2.6046e-06	7.744e-06	3.23e-06	4.652e-06	3.555e-06
0.4563	2.6256e-06	7.794e-06	3.291e-06	4.621e-06	3.601e-06
0.4618	2.6781e-06	7.88e-06	3.269e-06	4.681e-06	3.668e-06
0.4689	2.764e-06	7.877e-06	3.325e-06	4.78e-06	3.775e-06
0.4746	2.743e-06	7.872e-06	3.361e-06	4.724e-06	3.822e-06
0.4767	2.84e-06	7.914e-06	3.34e-06	4.756e-06	3.896e-06
0.4866	2.884e-06	7.917e-06	3.405e-06	4.821e-06	3.982e-06
0.4925	2.922e-06	7.84e-06	3.416e-06	4.742e-06	4.035e-06
0.4988	2.966e-06	7.863e-06	3.392e-06	4.774e-06	4.108e-06
0.5045	3.018e-06	7.866e-06	3.466e-06	4.821e-06	4.195e-06
0.5107	3.099e-06	7.772e-06	3.458e-06	4.74e-06	4.247e-06
0.5194	3.115e-06	7.808e-06	3.428e-06	4.743e-06	4.318e-06
0.5224	3.187e-06	7.816e-06	3.489e-06	4.795e-06	4.394e-06
0.5289	3.276e-06	7.755e-06	3.492e-06	4.735e-06	4.458e-06
0.5357	3.277e-06	7.805e-06	3.467e-06	4.722e-06	4.53e-06
0.5404	3.361e-06	7.832e-06	3.518e-06	4.797e-06	4.617e-06
0.5469	3.482e-06	7.804e-06	3.529e-06	4.743e-06	4.67e-06
0.5528	3.482e-06	7.91e-06	3.515e-06	4.728e-06	4.741e-06
0.557	3.589e-06	7.951e-06	3.573e-06	4.796e-06	4.85e-06
0.565	3.704e-06	7.976e-06	3.613e-06	4.752e-06	4.891e-06
0.5707	3.802e-06	8.082e-06	3.574e-06	4.764e-06	4.96e-06
0.5728	3.822e-06	8.163e-06	3.644e-06	4.84e-06	5.075e-06
0.5827	3.984e-06	8.258e-06	3.7e-06	4.817e-06	5.12e-06
0.5889	4.126e-06	8.353e-06	3.662e-06	4.832e-06	5.197e-06
0.596	4.101e-06	8.461e-06	3.735e-06	4.955e-06	5.316e-06
0.6006	4.264e-06	8.587e-06	3.8e-06	4.953e-06	5.359e-06
0.6069	4.441e-06	8.694e-06	3.773e-06	5.012e-06	5.454e-06
0.6148	4.387e-06	8.805e-06	3.858e-06	5.138e-06	5.577e-06
0.6185	4.578e-06	8.946e-06	3.934e-06	5.173e-06	5.629e-06
0.625	4.758e-06	9.083e-06	3.913e-06	5.276e-06	5.741e-06
0.631	4.691e-06	9.224e-06	4.024e-06	5.414e-06	5.874e-06
0.6363	4.896e-06	9.351e-06	4.107e-06	5.454e-06	5.942e-06
0.6432	5.101e-06	9.472e-06	4.115e-06	5.595e-06	6.05e-06
0.6485	5.051e-06	9.653e-06	4.239e-06	5.75e-06	6.198e-06
0.6521	5.232e-06	9.792e-06	4.34e-06	5.828e-06	6.295e-06
0.661	5.458e-06	1e-05	4.384e-06	5.983e-06	6.397e-06
0.6665	5.493e-06	1.0147e-05	4.508e-06	6.175e-06	6.558e-06
0.6697	5.617e-06	1.0276e-05	4.636e-06	6.287e-06	6.672e-06
0.679	5.869e-06	1.0559e-05	4.708e-06	6.485e-06	6.788e-06
0.6847	5.958e-06	1.0714e-05	4.839e-06	6.697e-06	6.959e-06
0.693	6.042e-06	1.0911e-05	4.986e-06	6.856e-06	7.074e-06
0.6966	6.318e-06	1.1209e-05	5.078e-06	7.086e-06	7.197e-06
0.6969	5.876e-06	1.0189e-05	4.666e-06	6.576e-06	6.792e-06
0.6926	5.008e-06	8.552e-06	3.875e-06	5.439e-06	5.894e-06
0.6847	4.53e-06	7.394e-06	3.259e-06	4.696e-06	5.221e-06
0.679	4.04e-06	6.391e-06	2.826e-06	4.162e-06	4.744e-06
0.673	3.52e-06	5.594e-06	2.491e-06	3.614e-06	4.279e-06
0.6662	3.299e-06	4.949e-06	2.132e-06	3.212e-06	3.876e-06
0.6607	3.033e-06	4.38e-06	1.8e-06	2.925e-06	3.579e-06
0.6548	2.669e-06	3.905e-06	1.5682e-06	2.551e-06	3.262e-06
0.6456	2.529e-06	3.527e-06	1.3622e-06	2.31e-06	3.003e-06
0.6426	2.345e-06	3.178e-06	1.1871e-06	2.0182e-06	2.786e-06
0.6368	2.0648e-06	2.801e-06	1.0245e-06	1.8154e-06	2.553e-06
0.629	1.8969e-06	2.565e-06	8.806e-07	1.642e-06	2.361e-06
0.6243	1.7446e-06	2.358e-06	7.59e-07	1.4902e-06	2.1146e-06
0.6187	1.6091e-06	1.9904e-06	6.45e-07	1.341e-06	1.9585e-06
0.6151	1.4745e-06	1.8003e-06	5.344e-07	1.2107e-06	1.8101e-06
0.6063	1.3714e-06	1.6254e-06	4.498e-07	1.1014e-06	1.6808e-06
0.6006	1.2722e-06	1.4673e-06	3.646e-07	9.916e-07	1.5566e-06
0.5963	1.1685e-06	1.3252e-06	2.837e-07	8.951e-07	1.4403e-06
0.5885	1.0847e-06	1.2024e-06	2.174e-07	8.106e-07	1.3352e-06
0.5828	1.0086e-06	1.0767e-06	-8.588e-08	7.256e-07	1.2331e-06
0.5768	9.24e-07	9.662e-07	-1.5625e-07	6.467e-07	1.1385e-06
0.569	8.603e-07	8.74e-07	-2.1609e-07	5.783e-07	1.0518e-06
0.5647	7.974e-07	7.768e-07	-2.7028e-07	5.112e-07	9.64e-07
0.5584	7.34e-07	6.944e-07	-7.59e-08	4.451e-07	8.801e-07
0.5486	6.754e-07	6.151e-07	-3.1155e-07	3.886e-07	8.035e-07
0.5466	6.268e-07	5.364e-07	-1.611e-07	3.307e-07	7.252e-07
0.5408	5.813e-07	4.692e-07	-3.2768e-07	2.691e-07	6.521e-07
0.534	5.236e-07	4.001e-07	-2.453e-07	2.237e-07	5.851e-07
0.5284	4.824e-07	3.372e-07	-2.752e-07	-2.4591e-07	5.109e-07
0.5231	4.486e-07	2.755e-07	-3.169e-07	-3.2768e-07	4.42e-07
0.5192	3.955e-07	2.124e-07	-3.489e-07	6.3e-08	3.795e-07
0.5109	3.625e-07	-2.7531e-07	-3.831e-07	-3.2768e-07	3.075e-07
0.5048	3.325e-07	8.49e-08	-4.275e-07	-4.23e-08	2.436e-07
0.4991	2.768e-07	-3.2768e-07	-4.58e-07	-3.2768e-07	1.808e-07
0.4923	2.505e-07	-4.38e-08	-4.967e-07	-1.526e-07	-1.3065e-07
0.4871	2.251e-07	-3.2768e-07	-5.396e-07	-3.2768e-07	-2.0926e-07
0.4812	-5.923e-08	-1.756e-07	-5.737e-07	-2.666e-07	-2.7739e-07
0.4734	-1.0171e-07	-3.2768e-07	-6.112e-07	-3.265e-07	-9.22e-08
0.4696	-1.3654e-07	-3.301e-07	-6.579e-07	-3.935e-07	-3.2768e-07
0.4629	-1.7102e-07	-4.102e-07	-6.959e-07	-4.641e-07	-2.151e-07
0.4528	-2.0495e-07	-5.117e-07	-7.408e-07	-5.475e-07	-3.2768e-07
0.451	-2.3815e-07	-6.049e-07	-7.881e-07	-6.342e-07	-3.445e-07
0.4448	-2.7301e-07	-7.229e-07	-8.317e-07	-7.202e-07	-3.959e-07
0.4397	-6.35e-08	-8.526e-07	-8.814e-07	-8.197e-07	-4.625e-07
0.4326	-2.8928e-07	-9.781e-07	-9.305e-07	-9.162e-07	-5.231e-07
0.427	-1.205e-07	-1.1259e-06	-9.766e-07	-1.0132e-06	-5.76e-07
0.4234	-3.2768e-07	-1.2788e-06	-1.0242e-06	-1.1171e-06	-6.424e-07
0.4151	-1.922e-07	-1.4272e-06	-1.0777e-06	-1.2163e-06	-7.034e-07
0.409	-3.2768e-07	-1.5906e-06	-1.1258e-06	-1.3133e-06	-7.607e-07
0.4037	-2.807e-07	-1.7515e-06	-1.1724e-06	-1.4171e-06	-8.229e-07
0.3963	-3.02e-07	-1.9094e-06	-1.2275e-06	-1.5128e-06	-8.855e-07
0.3903	-3.353e-07	-2.0628e-06	-1.2743e-06	-1.6068e-06	-9.409e-07
0.3844	-3.85e-07	-2.2191e-06	-1.3234e-06	-1.7077e-06	-1.0059e-06
0.3765	-4.164e-07	-2.3692e-06	-1.3845e-06	-1.8097e-06	-1.0678e-06
0.3729	-4.466e-07	-2.5135e-06	-1.4347e-06	-1.8997e-06	-1.1197e-06
0.3668	-4.9e-07	-2.6601e-06	-1.4888e-06	-2.0066e-06	-1.1773e-06
0.3577	-5.246e-07	-2.791e-06	-1.5478e-06	-2.1056e-06	-1.2281e-06
0.3543	-5.613e-07	-2.801e-06	-1.6029e-06	-2.1993e-06	-1.2755e-06
0.3492	-6.048e-07	-3.016e-06	-1.6603e-06	-2.3075e-06	-1.3273e-06
0.3455	-6.455e-07	-3.103e-06	-1.7193e-06	-2.4014e-06	-1.3721e-06
0.3361	-6.863e-07	-3.218e-06	-1.7687e-06	-2.4893e-06	-1.4122e-06
0.3304	-7.296e-07	-3.451e-06	-1.8192e-06	-2.5819e-06	-1.4573e-06
0.3261	-7.829e-07	-3.556e-06	-1.8743e-06	-2.6656e-06	-1.4994e-06
0.3181	-8.251e-07	-3.683e-06	-1.9162e-06	-2.603e-06	-1.5353e-06
0.3128	-8.605e-07	-3.913e-06	-1.9607e-06	-2.695e-06	-1.5721e-06
0.3069	-9.123e-07	-4.007e-06	-2.0044e-06	-2.757e-06	-1.6099e-06
0.3004	-9.443e-07	-4.133e-06	-2.0393e-06	-2.755e-06	-1.6421e-06
0.295	-9.757e-07	-4.313e-06	-2.0797e-06	-2.807e-06	-1.6821e-06
0.2888	-1.0154e-06	-4.396e-06	-2.1194e-06	-2.861e-06	-1.7182e-06
0.2791	-1.0414e-06	-4.48e-06	-2.152e-06	-2.825e-06	-1.7492e-06
0.2772	-1.0636e-06	-4.599e-06	-2.1847e-06	-2.864e-06	-1.789e-06
0.2709	-1.0817e-06	-4.673e-06	-2.2203e-06	-2.896e-06	-1.8247e-06
0.2622	-1.1113e-06	-4.725e-06	-2.2532e-06	-2.849e-06	-1.8581e-06
0.258	-1.1243e-06	-4.791e-06	-2.2825e-06	-2.878e-06	-1.8967e-06
0.2524	-1.1321e-06	-4.839e-06	-2.3203e-06	-2.9e-06	-1.931e-06
0.2496	-1.1587e-06	-4.834e-06	-2.3478e-06	-2.831e-06	-1.9567e-06
0.2411	-1.1631e-06	-4.874e-06	-2.3788e-06	-2.859e-06	-1.997e-06
0.23399	-1.1666e-06	-4.886e-06	-2.4197e-06	-2.862e-06	-2.0256e-06
0.22915	-1.1937e-06	-4.865e-06	-2.4485e-06	-2.812e-06	-2.0511e-06
0.22184	-1.1963e-06	-4.873e-06	-2.478e-06	-2.827e-06	-2.0821e-06
0.21612	-1.1969e-06	-4.846e-06	-2.5148e-06	-2.812e-06	-2.1036e-06
0.2102	-1.225e-06	-4.801e-06	-2.5429e-06	-2.789e-06	-2.1273e-06
0.20397	-1.2293e-06	-4.799e-06	-2.5663e-06	-2.8e-06	-2.1503e-06
0.198	-1.2265e-06	-4.743e-06	-2.5933e-06	-2.78e-06	-2.1654e-06
0.19107	-1.2479e-06	-4.675e-06	-2.6101e-06	-2.737e-06	-2.1722e-06
0.18127	-1.2539e-06	-4.653e-06	-2.626e-06	-2.758e-06	-2.1835e-06
0.17965	-1.2549e-06	-4.553e-06	-2.6433e-06	-2.731e-06	-2.191e-06
0.17434	-1.2651e-06	-4.516e-06	-2.6541e-06	-2.692e-06	-2.1929e-06
0.16751	-1.2787e-06	-4.48e-06	-2.6601e-06	-2.697e-06	-2.1988e-06
0.16142	-1.2741e-06	-4.347e-06	-2.6667e-06	-2.666e-06	-2.2005e-06
0.15607	-1.2831e-06	-4.313e-06	-2.579e-06	-2.618e-06	-2.1942e-06
0.15299	-1.2977e-06	-4.291e-06	-2.561e-06	-2.61e-06	-2.1999e-06
0.14376	-1.2887e-06	-4.153e-06	-2.585e-06	-2.566e-06	-2.1963e-06
0.13776	-1.2942e-06	-4.111e-06	-2.547e-06	-2.493e-06	-2.1874e-06
0.13263	-1.3051e-06	-4.055e-06	-2.513e-06	-2.504e-06	-2.1873e-06
0.12552	-1.2909e-06	-3.935e-06	-2.537e-06	-2.46e-06	-2.1865e-06
0.11952	-1.2915e-06	-3.874e-06	-2.504e-06	-2.363e-06	-2.1724e-06
0.11335	-1.3017e-06	-3.828e-06	-2.46e-06	-2.4773e-06	-2.1747e-06
0.10696	-1.2861e-06	-3.711e-06	-2.478e-06	-2.4498e-06	-2.1744e-06
0.10203	-1.2795e-06	-3.649e-06	-2.437e-06	-2.4151e-06	-2.1689e-06
0.09558	-1.2828e-06	-3.596e-06	-2.403e-06	-2.3898e-06	-2.1705e-06
0.08655	-1.2735e-06	-3.5e-06	-2.4827e-06	-2.3633e-06	-2.1744e-06
0.08366	-1.2628e-06	-3.392e-06	-2.4633e-06	-2.3259e-06	-2.1714e-06
0.07816	-1.2591e-06	-3.396e-06	-2.447e-06	-2.3041e-06	-2.1779e-06
0.07286	-1.2545e-06	-3.283e-06	-2.4325e-06	-2.275e-06	-2.1777e-06
0.06549	-1.2494e-06	-3.181e-06	-2.4113e-06	-2.2481e-06	-2.1762e-06
0.06012	-1.2401e-06	-3.199e-06	-2.3948e-06	-2.2315e-06	-2.1822e-06
0.05661	-1.2396e-06	-3.098e-06	-2.3845e-06	-2.2071e-06	-2.1851e-06
0.04781	-1.2335e-06	-3.017e-06	-2.3649e-06	-2.1807e-06	-2.1862e-06
0.042	-1.2234e-06	-3.049e-06	-2.3525e-06	-2.1647e-06	-2.1902e-06
0.03628	-1.229e-06	-2.949e-06	-2.3466e-06	-2.1523e-06	-2.1987e-06
0.02928	-1.2183e-06	-2.874e-06	-2.3275e-06	-2.1286e-06	-2.1983e-06
0.02383	-1.2119e-06	-2.9e-06	-2.3122e-06	-2.1109e-06	-2.2045e-06
0.017679	-1.2157e-06	-2.816e-06	-2.3003e-06	-2.0963e-06	-2.2111e-06
0.009352	-1.2103e-06	-2.755e-06	-2.2859e-06	-2.0782e-06	-2.2123e-06
0.006015	-1.2007e-06	-2.771e-06	-2.2745e-06	-2.0642e-06	-2.2229e-06
-6.2e-05	-1.2014e-06	-2.708e-06	-2.2681e-06	-2.0537e-06	-2.2313e-06
-0.009504	-1.2036e-06	-2.643e-06	-2.2569e-06	-2.0347e-06	-2.2332e-06
-0.012361	-1.2005e-06	-2.636e-06	-2.245e-06	-2.0251e-06	-2.2503e-06
-0.018405	-1.1946e-06	-2.61e-06	-2.2407e-06	-2.0173e-06	-2.2585e-06
-0.022521	-1.2059e-06	-2.562e-06	-2.2323e-06	-2.0009e-06	-2.2676e-06
-0.030464	-1.1995e-06	-2.54e-06	-2.2229e-06	-1.9919e-06	-2.2825e-06
-0.0359	-1.195e-06	-2.524e-06	-2.2186e-06	-1.9841e-06	-2.2945e-06
-0.04065	-1.2103e-06	-2.473e-06	-2.2089e-06	-1.9697e-06	-2.3074e-06
-0.0485	-1.2037e-06	-2.464e-06	-2.1999e-06	-1.9625e-06	-2.326e-06
-0.05389	-1.2033e-06	-2.45e-06	-2.2e-06	-1.9535e-06	-2.3395e-06
-0.06018	-1.2182e-06	-2.402e-06	-2.1952e-06	-1.9395e-06	-2.3513e-06
-0.06705	-1.2123e-06	-2.4854e-06	-2.1901e-06	-1.9366e-06	-2.3758e-06
-0.07199	-1.2074e-06	-2.4713e-06	-2.1943e-06	-1.9265e-06	-2.3983e-06
-0.07865	-1.2246e-06	-2.4561e-06	-2.1907e-06	-1.9234e-06	-2.4135e-06
-0.0877	-1.2212e-06	-2.4382e-06	-2.1867e-06	-1.9175e-06	-2.4365e-06
-0.09001	-1.2131e-06	-2.4185e-06	-2.1945e-06	-1.9118e-06	-2.4612e-06
-0.09667	-1.2255e-06	-2.3987e-06	-2.1881e-06	-1.9061e-06	-2.4815e-06
-0.10439	-1.2335e-06	-2.3895e-06	-2.1881e-06	-1.9053e-06	-2.5139e-06
-0.10837	-1.2279e-06	-2.3652e-06	-2.1945e-06	-1.9011e-06	-2.5377e-06
-0.11388	-1.2355e-06	-2.3572e-06	-2.1961e-06	-1.9001e-06	-2.5611e-06
-0.11799	-1.2473e-06	-2.3482e-06	-2.2036e-06	-1.901e-06	-2.5953e-06
-0.12655	-1.2431e-06	-2.3314e-06	-2.2111e-06	-1.9008e-06	-2.6299e-06
-0.13195	-1.253e-06	-2.329e-06	-2.2154e-06	-1.8972e-06	-2.6633e-06
-0.13686	-1.2717e-06	-2.3263e-06	-2.2242e-06	-1.9105e-06	-2.634e-06
-0.1447	-1.2662e-06	-2.3135e-06	-2.2323e-06	-1.9114e-06	-2.692e-06
-0.14985	-1.277e-06	-2.3123e-06	-2.2406e-06	-1.9119e-06	-2.659e-06
-0.15637	-1.3015e-06	-2.3147e-06	-2.2457e-06	-1.9191e-06	-2.735e-06
-0.16279	-1.296e-06	-2.3075e-06	-2.2585e-06	-1.9274e-06	-2.796e-06
-0.16826	-1.3046e-06	-2.3107e-06	-2.2669e-06	-1.9293e-06	-2.792e-06
-0.17452	-1.3251e-06	-2.3167e-06	-2.2762e-06	-1.9417e-06	-2.867e-06
-0.18416	-1.3278e-06	-2.3162e-06	-2.2969e-06	-1.9524e-06	-2.925e-06
-0.18633	-1.3405e-06	-2.32e-06	-2.306e-06	-1.9555e-06	-2.937e-06
-0.19246	-1.3557e-06	-2.337e-06	-2.3277e-06	-1.9756e-06	-3.033e-06
-0.19877	-1.3725e-06	-2.3439e-06	-2.3465e-06	-1.9882e-06	-3.078e-06
-0.20451	-1.3796e-06	-2.3499e-06	-2.3561e-06	-2.0007e-06	-3.108e-06
-0.21024	-1.3989e-06	-2.3715e-06	-2.3779e-06	-2.0218e-06	-3.196e-06
-0.2136	-1.4198e-06	-2.3801e-06	-2.4e-06	-2.0375e-06	-3.255e-06
-0.22253	-1.4344e-06	-2.392e-06	-2.4169e-06	-2.0507e-06	-3.3e-06
-0.22809	-1.4505e-06	-2.4176e-06	-2.4437e-06	-2.0804e-06	-3.395e-06
-0.23317	-1.4776e-06	-2.4347e-06	-2.4765e-06	-2.1054e-06	-3.473e-06
-0.24063	-1.4958e-06	-2.4571e-06	-2.5089e-06	-2.1258e-06	-3.531e-06
-0.24614	-1.5144e-06	-2.4857e-06	-2.5443e-06	-2.1586e-06	-3.637e-06
-0.25232	-1.5481e-06	-2.5099e-06	-2.5895e-06	-2.1974e-06	-3.748e-06
-0.25969	-1.5685e-06	-2.5369e-06	-2.6294e-06	-2.2286e-06	-3.809e-06
-0.26414	-1.5885e-06	-2.5711e-06	-2.6769e-06	-2.2694e-06	-3.955e-06
-0.27045	-1.6181e-06	-2.6013e-06	-2.678e-06	-2.3182e-06	-4.073e-06
-0.2796	-1.6516e-06	-2.6347e-06	-2.699e-06	-2.3593e-06	-4.146e-06
-0.2816	-1.6788e-06	-2.6748e-06	-2.739e-06	-2.4131e-06	-4.336e-06
-0.2873	-1.7055e-06	-2.637e-06	-2.857e-06	-2.4732e-06	-4.475e-06
-0.2927	-1.7532e-06	-2.658e-06	-2.895e-06	-2.5345e-06	-4.584e-06
-0.2994	-1.7868e-06	-2.723e-06	-2.957e-06	-2.6041e-06	-4.799e-06
-0.3051	-1.8217e-06	-2.789e-06	-3.098e-06	-2.6841e-06	-4.978e-06
-0.3091	-1.8807e-06	-2.818e-06	-3.16e-06	-2.659e-06	-5.136e-06
-0.3179	-1.9205e-06	-2.895e-06	-3.242e-06	-2.781e-06	-5.405e-06
-0.3233	-1.9644e-06	-2.979e-06	-3.412e-06	-2.888e-06	-5.627e-06
-0.3291	-2.0354e-06	-3.026e-06	-3.499e-06	-2.952e-06	-5.835e-06
-0.3361	-2.0841e-06	-3.136e-06	-3.607e-06	-3.108e-06	-6.162e-06
-0.3412	-2.1387e-06	-3.227e-06	-3.822e-06	-3.242e-06	-6.449e-06
-0.3478	-2.2202e-06	-3.302e-06	-3.934e-06	-3.394e-06	-6.711e-06
-0.3557	-2.2841e-06	-3.444e-06	-4.104e-06	-3.57e-06	-7.087e-06
-0.3592	-2.3475e-06	-3.551e-06	-4.35e-06	-3.775e-06	-7.441e-06
-0.3658	-2.4362e-06	-3.664e-06	-4.529e-06	-3.967e-06	-7.758e-06
-0.3752	-2.5263e-06	-3.843e-06	-4.75e-06	-4.236e-06	-8.167e-06
-0.3773	-2.6042e-06	-3.955e-06	-5.033e-06	-4.499e-06	-8.567e-06
-0.3838	-2.7059e-06	-4.137e-06	-5.273e-06	-4.745e-06	-8.909e-06
-0.388	-2.805e-06	-4.36e-06	-5.536e-06	-5.047e-06	-9.329e-06
-0.3957	-2.806e-06	-4.516e-06	-5.854e-06	-5.352e-06	-9.741e-06
-0.4015	-2.927e-06	-4.781e-06	-6.137e-06	-5.644e-06	-1.0094e-05
-0.4057	-3.164e-06	-5.049e-06	-6.428e-06	-6.005e-06	-1.0518e-05
-0.4137	-3.175e-06	-5.256e-06	-6.766e-06	-6.317e-06	-1.0939e-05
-0.4196	-3.332e-06	-5.564e-06	-7.063e-06	-6.617e-06	-1.1267e-05
-0.4256	-3.607e-06	-5.89e-06	-7.37e-06	-7.023e-06	-1.1702e-05
-0.4321	-3.64e-06	-6.146e-06	-7.728e-06	-7.377e-06	-1.2112e-05
-0.4374	-3.797e-06	-6.484e-06	-8.039e-06	-7.707e-06	-1.2442e-05
-0.444	-4.071e-06	-6.841e-06	-8.342e-06	-8.151e-06	-1.2869e-05
