# Supplementary material for: Voltammetric sensor for electrochemical determination of the floral origin of honey based on a zinc oxide nanoparticle modified carbon paste electrode
Source: Copernicus journal article supplement (doi:10.5194/jsss-7-319-2018), 2018-04-26
Supplement: Supplementary file 1 [file jsss-7-319-2018-supplement.zip › jsss-7-319-2018-supplement-title-page.pdf]

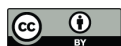

## *Supplement of*

# **Voltammetric sensor for electrochemical determination of the floral origin of honey based on a zinc oxide nanoparticle modified carbon paste electrode**

**Kamalika Tiwari et al.**

*Correspondence to:* Kamalika Tiwari (tiwari.kamalika@gmail.com)

- jsss-7-319-2018-supplement-title-page.pdf
- E-tongue responses for ZnONPs electrode.xls

The copyright of individual parts of the supplement might differ from the CC BY 4.0 License.
